# Supplementary material for: Assessing the importance of multireference correlation in predicting reversed conductance decay
Source: Royal Society of Chemistry journal article supplement (doi:10.1039/d3cp01110k), 2024-01-01
Supplement: d3cp01110k2.pdf [file d3cp01110k2.pdf]

## Supplementary Material

# Assessing the Importance of Multireference Correlation in Predicting Reversed Conductance Decay

*Tanner A Cossaboon, Samir Kazmi, Matthew Tineo, and Erik P Hoy\**

Department of Chemistry and Biochemistry, Rowan University, Glassboro, NJ 08028

Email: hoy@rowan.edu

| <b><u>Table of Contents</u></b> |                       |              |
|---------------------------------|-----------------------|--------------|
| <b>Section S1</b>               | XYZ coordinates       | Pages 1-41   |
| <b>Section S2</b>               | Active space Orbitals | Pages 42-100 |

**Section S1.** XYZ coordinates for all systems in Angstroms.

### **p1 Electrodes (1-layer)**

12

#1 Phenyl ring (p1)

|    |               |              |               |
|----|---------------|--------------|---------------|
| Al | -3.4007400000 | 0.0000000000 | 0.0000000000  |
| C  | -1.4344500000 | 0.0000000000 | 0.0000000000  |
| H  | -1.2268100000 | 0.0000000000 | 2.1606600000  |
| H  | -1.2268100000 | 0.0000000000 | -2.1606600000 |
| C  | -0.6992200000 | 0.0000000000 | 1.2090300000  |
| C  | -0.6992200000 | 0.0000000000 | -1.2090400000 |
| C  | 0.6992200000  | 0.0000000000 | 1.2090300000  |
| C  | 0.6992200000  | 0.0000000000 | -1.2090400000 |
| H  | 1.2268100000  | 0.0000000000 | 2.1606600000  |
| H  | 1.2268100000  | 0.0000000000 | -2.1606600000 |
| C  | 1.4344500000  | 0.0000000000 | 0.0000000000  |
| Al | 3.4007400000  | 0.0000000000 | 0.0000000000  |

22

#2 Phenyl ring (p1)

|    |               |               |               |
|----|---------------|---------------|---------------|
| Al | -5.5659700000 | 0.0000000000  | 0.0000500000  |
| C  | -3.6047800000 | -0.0001000000 | 0.0000000000  |
| H  | -3.3858500000 | 2.0513000000  | 0.6758600000  |
| H  | -3.3857400000 | -2.0514800000 | -0.6758700000 |
| C  | -2.8639300000 | 1.1464600000  | 0.3727700000  |
| C  | -2.8638800000 | -1.1466100000 | -0.3727800000 |
| C  | -1.4679900000 | 1.1496600000  | 0.3732100000  |
| C  | -1.4679300000 | -1.1497400000 | -0.3732300000 |
| H  | -0.9326800000 | 2.0388200000  | 0.6911100000  |
| H  | -0.9325800000 | -2.0388700000 | -0.6911500000 |
| C  | -0.7425500000 | -0.0000200000 | -0.0000100000 |
| C  | 0.7425500000  | 0.0000200000  | -0.0000100000 |
| H  | 0.9325700000  | 2.0388700000  | -0.6911300000 |
| H  | 0.9326900000  | -2.0388200000 | 0.6911200000  |
| C  | 1.4679300000  | 1.1497400000  | -0.3732200000 |
| C  | 1.4679900000  | -1.1496600000 | 0.3732100000  |
| C  | 2.8638700000  | 1.1466200000  | -0.3727800000 |
| C  | 2.8639400000  | -1.1464600000 | 0.3727600000  |
| H  | 3.3857400000  | 2.0514900000  | -0.6758700000 |
| H  | 3.3858500000  | -2.0513000000 | 0.6758600000  |
| C  | 3.6047800000  | 0.0001000000  | -0.0000100000 |
| Al | 5.5659700000  | 0.0000200000  | 0.0000600000  |

32

#3 Phenyl ring (p1)

|    |               |               |               |
|----|---------------|---------------|---------------|
| Al | -7.7345300000 | 0.0000700000  | -0.0001000000 |
| C  | -5.7738600000 | 0.0000100000  | -0.0000500000 |
| H  | -5.5550200000 | -2.1231200000 | -0.3954000000 |
| H  | -5.5549700000 | 2.1231400000  | 0.3953000000  |
| C  | -5.0328100000 | -1.1858600000 | -0.2164400000 |
| C  | -5.0327800000 | 1.1858700000  | 0.2163400000  |
| C  | -3.6370400000 | -1.1885600000 | -0.2187500000 |
| C  | -3.6370100000 | 1.1885500000  | 0.2186400000  |
| H  | -3.1021400000 | -2.1118500000 | -0.4184600000 |
| H  | -3.1020900000 | 2.1118300000  | 0.4183400000  |
| C  | -2.9107600000 | -0.0000100000 | -0.0000500000 |
| C  | -1.4265000000 | -0.0000200000 | -0.0000600000 |
| H  | -1.2281100000 | -1.9490000000 | 0.9113000000  |
| H  | -1.2281000000 | 1.9489700000  | -0.9113700000 |
| C  | -0.6969500000 | 1.1004400000  | -0.4925100000 |
| C  | -0.6969500000 | -1.1004800000 | 0.4924200000  |
| C  | 0.6969500000  | 1.1004400000  | -0.4925200000 |
| C  | 0.6969500000  | -1.1004800000 | 0.4924300000  |
| H  | 1.2280900000  | -1.9490100000 | 0.9113100000  |
| H  | 1.2281000000  | 1.9489800000  | -0.9113700000 |
| C  | 1.4265100000  | -0.0000200000 | -0.0000500000 |
| C  | 2.9107400000  | -0.0000100000 | -0.0000300000 |
| H  | 3.1021000000  | 2.1122400000  | 0.4163800000  |
| H  | 3.1021700000  | -2.1122400000 | -0.4164600000 |
| C  | 3.6370000000  | 1.1887500000  | 0.2175700000  |

|    |              |               |               |
|----|--------------|---------------|---------------|
| C  | 3.6370400000 | -1.1887500000 | -0.2176400000 |
| C  | 5.0327700000 | 1.1860800000  | 0.2152800000  |
| C  | 5.0328000000 | -1.1860400000 | -0.2153200000 |
| H  | 5.5549400000 | 2.1235300000  | 0.3933400000  |
| H  | 5.5550000000 | -2.1234700000 | -0.3933800000 |
| C  | 5.7738700000 | 0.0000300000  | -0.0000200000 |
| Al | 7.7345300000 | 0.0000400000  | -0.0000500000 |

42

#4 Phenyl ring (p1)

|    |               |               |               |
|----|---------------|---------------|---------------|
| Al | -9.9010800000 | -0.0000200000 | 0.0000000000  |
| C  | -7.9404500000 | -0.0000200000 | 0.0000100000  |
| H  | -7.7224900000 | 2.1549700000  | -0.1375000000 |
| H  | -7.7224800000 | -2.1550000000 | 0.1375200000  |
| C  | -7.1996400000 | 1.2028500000  | -0.0814900000 |
| C  | -7.1996400000 | -1.2028800000 | 0.0815000000  |
| C  | -5.8038900000 | 1.2060200000  | -0.0814000000 |
| C  | -5.8038900000 | -1.2060500000 | 0.0814100000  |
| H  | -5.2684500000 | 2.1497400000  | -0.1173100000 |
| H  | -5.2684500000 | -2.1497600000 | 0.1173200000  |
| C  | -5.0778600000 | -0.0000100000 | 0.0000100000  |
| C  | -3.5936800000 | -0.0000100000 | 0.0000000000  |
| H  | -3.3942400000 | 1.6406200000  | -1.3923600000 |
| H  | -3.3942300000 | -1.6406300000 | 1.3923700000  |
| C  | -2.8640600000 | 0.9325700000  | -0.7637800000 |
| C  | -2.8640600000 | -0.9325800000 | 0.7637800000  |
| C  | -1.4698400000 | 0.9330700000  | -0.7632600000 |
| C  | -1.4698300000 | -0.9330700000 | 0.7632700000  |
| H  | -0.9380400000 | 1.6417600000  | -1.3900300000 |
| H  | -0.9380300000 | -1.6417600000 | 1.3900400000  |
| C  | -0.7408000000 | 0.0000000000  | 0.0000000000  |
| C  | 0.7430900000  | 0.0000000000  | 0.0000000000  |
| H  | 0.9376900000  | 2.1512200000  | -0.0104800000 |
| H  | 0.9377000000  | -2.1512200000 | 0.0104800000  |
| C  | 1.4711800000  | 1.2060400000  | -0.0149200000 |
| C  | 1.4711900000  | -1.2060300000 | 0.0149200000  |
| C  | 2.8654800000  | 1.2061600000  | -0.0107200000 |
| C  | 2.8654900000  | -1.2061500000 | 0.0107100000  |
| H  | 3.3988600000  | 2.1510900000  | -0.0347800000 |
| H  | 3.3988700000  | -2.1510800000 | 0.0347600000  |
| C  | 3.5933700000  | 0.0000100000  | -0.0000100000 |
| C  | 5.0776900000  | 0.0000100000  | -0.0000100000 |
| H  | 5.2661400000  | -1.6778100000 | -1.3482800000 |
| H  | 5.2661500000  | 1.6778200000  | 1.3482600000  |
| C  | 5.8028400000  | 0.9519300000  | 0.7450900000  |
| C  | 5.8028400000  | -0.9519100000 | -0.7451100000 |
| C  | 7.1987800000  | 0.9485800000  | 0.7442600000  |
| C  | 7.1987800000  | -0.9485600000 | -0.7442900000 |
| H  | 7.7208000000  | -1.6935900000 | -1.3405800000 |
| H  | 7.7208100000  | 1.6936200000  | 1.3405400000  |
| C  | 7.9398300000  | 0.0000100000  | -0.0000200000 |

Al 9.9000000000 0.0000500000 -0.0000700000

52

#5 Phenyl ring (p1)

|    |                |               |               |
|----|----------------|---------------|---------------|
| Al | -12.0695900000 | 0.0005500000  | -0.0010200000 |
| C  | -10.1090500000 | 0.0002800000  | -0.0007900000 |
| H  | -9.8913300000  | -2.1555500000 | -0.1249100000 |
| H  | -9.8907700000  | 2.1560400000  | 0.1233800000  |
| C  | -9.3683600000  | -1.2031700000 | -0.0748300000 |
| C  | -9.3680500000  | 1.2035300000  | 0.0732000000  |
| C  | -7.9726300000  | -1.2065100000 | -0.0747200000 |
| C  | -7.9723200000  | 1.2065000000  | 0.0729600000  |
| H  | -7.4373700000  | -2.1505200000 | -0.1047000000 |
| H  | -7.4368000000  | 2.1503800000  | 0.1029000000  |
| C  | -7.2463400000  | -0.0001000000 | -0.0009300000 |
| C  | -5.7621600000  | -0.0002400000 | -0.0009100000 |
| H  | -5.5627700000  | -1.6512600000 | -1.3809400000 |
| H  | -5.5626900000  | 1.6507100000  | 1.3792000000  |
| C  | -5.0325600000  | -0.9386100000 | -0.7576200000 |
| C  | -5.0324900000  | 0.9379900000  | 0.7559300000  |
| C  | -3.6383300000  | -0.9392300000 | -0.7569700000 |
| C  | -3.6382700000  | 0.9382800000  | 0.7555600000  |
| H  | -3.1062900000  | -1.6526400000 | -1.3781600000 |
| H  | -3.1061400000  | 1.6515400000  | 1.3768700000  |
| C  | -2.9092700000  | -0.0005800000 | -0.0006000000 |
| C  | -1.4253800000  | -0.0007000000 | -0.0003400000 |
| H  | -1.2307700000  | 2.1504600000  | -0.0111500000 |
| H  | -1.2307600000  | -2.1518700000 | 0.0106700000  |
| C  | -0.6972400000  | -1.2067200000 | -0.0030000000 |
| C  | -0.6972100000  | 1.2053300000  | 0.0027200000  |
| C  | 0.6971500000   | 1.2053300000  | -0.0002300000 |
| C  | 0.6971500000   | -1.2067300000 | 0.0006200000  |
| H  | 1.2305800000   | -2.1518900000 | -0.0150000000 |
| H  | 1.2306700000   | 2.1504400000  | 0.0157300000  |
| C  | 1.4253300000   | -0.0007200000 | 0.0003500000  |
| C  | 2.9092600000   | -0.0005800000 | 0.0007100000  |
| H  | 3.1061300000   | 1.6546600000  | -1.3730100000 |
| H  | 3.1063600000   | -1.6558600000 | 1.3743900000  |
| C  | 3.6382600000   | 0.9400500000  | -0.7532800000 |
| C  | 3.6383400000   | -0.9410000000 | 0.7548400000  |
| C  | 5.0324700000   | 0.9398000000  | -0.7536100000 |
| C  | 5.0325800000   | -0.9403700000 | 0.7554900000  |
| H  | 5.5626800000   | 1.6539200000  | -1.3752600000 |
| H  | 5.5628000000   | -1.6544400000 | 1.3771700000  |
| C  | 5.7621600000   | -0.0001700000 | 0.0010600000  |
| C  | 7.2463700000   | 0.0000000000  | 0.0010800000  |
| H  | 7.4368500000   | 2.1507600000  | -0.0968900000 |
| H  | 7.4374300000   | -2.1507000000 | 0.0991300000  |
| C  | 7.9723600000   | 1.2068000000  | -0.0695300000 |
| C  | 7.9726700000   | -1.2066000000 | 0.0717200000  |
| C  | 9.3680900000   | 1.2038300000  | -0.0696900000 |

|    |              |              |              |
|----|--------------|--------------|--------------|
| C  | 9.368400000  | -1.203250000 | 0.071860000  |
| H  | 9.890810000  | 2.156480000  | -0.117220000 |
| H  | 9.891390000  | -2.155750000 | 0.119350000  |
| C  | 10.109080000 | 0.000390000  | 0.001090000  |
| Al | 12.069630000 | 0.000420000  | 0.001550000  |

### P1 Electrodes (2-layer)

14

#1 Ring (p1-2)

|    |          |         |          |
|----|----------|---------|----------|
| Al | -5.89953 | 0.00000 | 0.00000  |
| Al | -3.40074 | 0.00000 | 0.00000  |
| C  | -1.43445 | 0.00000 | 0.00000  |
| H  | -1.22681 | 0.00000 | -2.16066 |
| H  | -1.22681 | 0.00000 | 2.16066  |
| C  | -0.69922 | 0.00000 | -1.20904 |
| C  | -0.69922 | 0.00000 | 1.20903  |
| C  | 0.69922  | 0.00000 | -1.20904 |
| C  | 0.69922  | 0.00000 | 1.20903  |
| H  | 1.22681  | 0.00000 | -2.16066 |
| H  | 1.22681  | 0.00000 | 2.16066  |
| C  | 1.43445  | 0.00000 | 0.00000  |
| Al | 3.40074  | 0.00000 | 0.00000  |
| Al | 5.89953  | 0.00000 | 0.00000  |

24

#2 Phenyl ring (p1-2)

|    |          |          |          |
|----|----------|----------|----------|
| Al | -8.06476 | 0.00000  | 0.00000  |
| Al | -5.56597 | 0.00000  | 0.00005  |
| C  | -3.60478 | -0.00010 | 0.00000  |
| H  | -3.38585 | 2.05130  | 0.67586  |
| H  | -3.38574 | -2.05148 | -0.67587 |
| C  | -2.86393 | 1.14646  | 0.37277  |
| C  | -2.86388 | -1.14661 | -0.37278 |
| C  | -1.46799 | 1.14966  | 0.37321  |
| C  | -1.46793 | -1.14974 | -0.37323 |
| H  | -0.93268 | 2.03882  | 0.69111  |
| H  | -0.93258 | -2.03887 | -0.69115 |
| C  | -0.74255 | -0.00002 | -0.00001 |
| C  | 0.74255  | 0.00002  | -0.00001 |
| H  | 0.93257  | 2.03887  | -0.69113 |
| H  | 0.93269  | -2.03882 | 0.69112  |
| C  | 1.46793  | 1.14974  | -0.37322 |
| C  | 1.46799  | -1.14966 | 0.37321  |
| C  | 2.86387  | 1.14662  | -0.37278 |
| C  | 2.86394  | -1.14646 | 0.37276  |
| H  | 3.38574  | 2.05149  | -0.67587 |
| H  | 3.38585  | -2.05130 | 0.67586  |
| C  | 3.60478  | 0.00010  | -0.00001 |
| Al | 5.56597  | 0.00002  | 0.00006  |
| Al | 8.06476  | 0.00000  | 0.00000  |

34

#3 Phenyl ring (p1-2)

|    |           |          |          |
|----|-----------|----------|----------|
| Al | -10.23332 | 0.00000  | 0.00000  |
| Al | -7.73453  | 0.00007  | -0.00010 |
| C  | -5.77386  | 0.00001  | -0.00005 |
| H  | -5.55502  | -2.12312 | -0.39540 |
| H  | -5.55497  | 2.12314  | 0.39530  |
| C  | -5.03281  | -1.18586 | -0.21644 |
| C  | -5.03278  | 1.18587  | 0.21634  |
| C  | -3.63704  | -1.18856 | -0.21875 |
| C  | -3.63701  | 1.18855  | 0.21864  |
| H  | -3.10214  | -2.11185 | -0.41846 |
| H  | -3.10209  | 2.11183  | 0.41834  |
| C  | -2.91076  | -0.00001 | -0.00005 |
| C  | -1.42650  | -0.00002 | -0.00006 |
| H  | -1.22811  | -1.94900 | 0.91130  |
| H  | -1.22810  | 1.94897  | -0.91137 |
| C  | -0.69695  | -1.10048 | 0.49242  |
| C  | -0.69695  | 1.10044  | -0.49251 |
| C  | 0.69695   | -1.10048 | 0.49243  |
| C  | 0.69695   | 1.10044  | -0.49252 |
| H  | 1.22809   | -1.94901 | 0.91131  |
| H  | 1.22810   | 1.94898  | -0.91137 |
| C  | 1.42651   | -0.00002 | -0.00005 |
| C  | 2.91074   | -0.00001 | -0.00003 |
| H  | 3.10210   | 2.11224  | 0.41638  |
| H  | 3.10217   | -2.11224 | -0.41646 |
| C  | 3.63700   | 1.18875  | 0.21757  |
| C  | 3.63704   | -1.18875 | -0.21764 |
| C  | 5.03277   | 1.18608  | 0.21528  |
| C  | 5.03280   | -1.18604 | -0.21532 |
| H  | 5.55494   | 2.12353  | 0.39334  |
| H  | 5.55500   | -2.12347 | -0.39338 |
| C  | 5.77387   | 0.00003  | -0.00002 |
| Al | 7.73453   | 0.00004  | -0.00005 |
| Al | 10.23332  | 0.00000  | 0.00000  |

44

#4 Phenyl ring (p1-2)

|    |           |          |          |
|----|-----------|----------|----------|
| Al | -12.39987 | 0.00000  | 0.00000  |
| Al | -9.90108  | -0.00002 | 0.00000  |
| C  | -7.94045  | -0.00002 | 0.00001  |
| H  | -7.72249  | 2.15497  | -0.13750 |
| H  | -7.72248  | -2.15500 | 0.13752  |
| C  | -7.19964  | 1.20285  | -0.08149 |
| C  | -7.19964  | -1.20288 | 0.08150  |
| C  | -5.80389  | 1.20602  | -0.08140 |
| C  | -5.80389  | -1.20605 | 0.08141  |
| H  | -5.26845  | 2.14974  | -0.11731 |
| H  | -5.26845  | -2.14976 | 0.11732  |

|    |          |          |          |
|----|----------|----------|----------|
| C  | -5.07786 | -0.00001 | 0.00001  |
| C  | -3.59368 | -0.00001 | 0.00000  |
| H  | -3.39424 | 1.64062  | -1.39236 |
| H  | -3.39423 | -1.64063 | 1.39237  |
| C  | -2.86406 | 0.93257  | -0.76378 |
| C  | -2.86406 | -0.93258 | 0.76378  |
| C  | -1.46984 | 0.93307  | -0.76326 |
| C  | -1.46983 | -0.93307 | 0.76327  |
| H  | -0.93804 | 1.64176  | -1.39003 |
| H  | -0.93803 | -1.64176 | 1.39004  |
| C  | -0.74080 | 0.00000  | 0.00000  |
| C  | 0.74309  | 0.00000  | 0.00000  |
| H  | 0.93769  | 2.15122  | -0.01048 |
| H  | 0.93770  | -2.15122 | 0.01048  |
| C  | 1.47118  | 1.20604  | -0.01492 |
| C  | 1.47119  | -1.20603 | 0.01492  |
| C  | 2.86548  | 1.20616  | -0.01072 |
| C  | 2.86549  | -1.20615 | 0.01071  |
| H  | 3.39886  | 2.15109  | -0.03478 |
| H  | 3.39887  | -2.15108 | 0.03476  |
| C  | 3.59337  | 0.00001  | -0.00001 |
| C  | 5.07769  | 0.00001  | -0.00001 |
| H  | 5.26614  | -1.67781 | -1.34828 |
| H  | 5.26615  | 1.67782  | 1.34826  |
| C  | 5.80284  | 0.95193  | 0.74509  |
| C  | 5.80284  | -0.95191 | -0.74511 |
| C  | 7.19878  | 0.94858  | 0.74426  |
| C  | 7.19878  | -0.94856 | -0.74429 |
| H  | 7.72080  | -1.69359 | -1.34058 |
| H  | 7.72081  | 1.69362  | 1.34054  |
| C  | 7.93983  | 0.00001  | -0.00002 |
| Al | 9.90000  | 0.00005  | -0.00007 |
| Al | 12.39879 | 0.00000  | 0.00000  |

54

#5 Phenyl ring (p1-6)

|    |           |          |          |
|----|-----------|----------|----------|
| Al | -14.56838 | 0.00000  | 0.00000  |
| Al | -12.06959 | 0.00055  | -0.00102 |
| C  | -10.10905 | 0.00028  | -0.00079 |
| H  | -9.89133  | -2.15555 | -0.12491 |
| H  | -9.89077  | 2.15604  | 0.12338  |
| C  | -9.36836  | -1.20317 | -0.07483 |
| C  | -9.36805  | 1.20353  | 0.07320  |
| C  | -7.97263  | -1.20651 | -0.07472 |
| C  | -7.97232  | 1.20650  | 0.07296  |
| H  | -7.43737  | -2.15052 | -0.10470 |
| H  | -7.43680  | 2.15038  | 0.10290  |
| C  | -7.24634  | -0.00010 | -0.00093 |
| C  | -5.76216  | -0.00024 | -0.00091 |
| H  | -5.56277  | -1.65126 | -1.38094 |
| H  | -5.56269  | 1.65071  | 1.37920  |

|    |          |          |          |
|----|----------|----------|----------|
| C  | -5.03256 | -0.93861 | -0.75762 |
| C  | -5.03249 | 0.93799  | 0.75593  |
| C  | -3.63833 | -0.93923 | -0.75697 |
| C  | -3.63827 | 0.93828  | 0.75556  |
| H  | -3.10629 | -1.65264 | -1.37816 |
| H  | -3.10614 | 1.65154  | 1.37687  |
| C  | -2.90927 | -0.00058 | -0.00060 |
| C  | -1.42538 | -0.00070 | -0.00034 |
| H  | -1.23077 | 2.15046  | -0.01115 |
| H  | -1.23076 | -2.15187 | 0.01067  |
| C  | -0.69724 | -1.20672 | -0.00300 |
| C  | -0.69721 | 1.20533  | 0.00272  |
| C  | 0.69715  | 1.20533  | -0.00023 |
| C  | 0.69715  | -1.20673 | 0.00062  |
| H  | 1.23058  | -2.15189 | -0.01500 |
| H  | 1.23067  | 2.15044  | 0.01573  |
| C  | 1.42533  | -0.00072 | 0.00035  |
| C  | 2.90926  | -0.00058 | 0.00071  |
| H  | 3.10613  | 1.65466  | -1.37301 |
| H  | 3.10636  | -1.65586 | 1.37439  |
| C  | 3.63826  | 0.94005  | -0.75328 |
| C  | 3.63834  | -0.94100 | 0.75484  |
| C  | 5.03247  | 0.93980  | -0.75361 |
| C  | 5.03258  | -0.94037 | 0.75549  |
| H  | 5.56268  | 1.65392  | -1.37526 |
| H  | 5.56280  | -1.65444 | 1.37717  |
| C  | 5.76216  | -0.00017 | 0.00106  |
| C  | 7.24637  | 0.00000  | 0.00108  |
| H  | 7.43685  | 2.15076  | -0.09689 |
| H  | 7.43743  | -2.15070 | 0.09913  |
| C  | 7.97236  | 1.20680  | -0.06953 |
| C  | 7.97267  | -1.20660 | 0.07172  |
| C  | 9.36809  | 1.20383  | -0.06969 |
| C  | 9.36840  | -1.20325 | 0.07186  |
| H  | 9.89081  | 2.15648  | -0.11722 |
| H  | 9.89139  | -2.15575 | 0.11935  |
| C  | 10.10908 | 0.00039  | 0.00109  |
| Al | 12.06963 | 0.00042  | 0.00155  |
| Al | 14.56842 | 0.00000  | 0.00000  |

### **P1 Electrodes (4-layer)**

18

#1 Phenyl ring (p1-4)

|    |           |         |          |
|----|-----------|---------|----------|
| Al | -10.89711 | 0.00000 | 0.00000  |
| Al | -8.39832  | 0.00000 | 0.00000  |
| Al | -5.89953  | 0.00000 | 0.00000  |
| Al | -3.40074  | 0.00000 | 0.00000  |
| C  | -1.43445  | 0.00000 | 0.00000  |
| H  | -1.22681  | 0.00000 | -2.16066 |
| H  | -1.22681  | 0.00000 | 2.16066  |



|    |          |         |          |
|----|----------|---------|----------|
| C  | -0.69922 | 0.00000 | -1.20904 |
| C  | -0.69922 | 0.00000 | 1.20903  |
| C  | 0.69922  | 0.00000 | -1.20904 |
| C  | 0.69922  | 0.00000 | 1.20903  |
| H  | 1.22681  | 0.00000 | -2.16066 |
| H  | 1.22681  | 0.00000 | 2.16066  |
| C  | 1.43445  | 0.00000 | 0.00000  |
| Al | 3.40074  | 0.00000 | 0.00000  |
| Al | 5.89953  | 0.00000 | 0.00000  |
| Al | 8.39832  | 0.00000 | 0.00000  |
| Al | 10.89711 | 0.00000 | 0.00000  |

28

#2 Phenyl ring (p1-4)

|    |           |          |          |
|----|-----------|----------|----------|
| Al | -13.06234 | 0.00000  | 0.00000  |
| Al | -10.56355 | 0.00000  | 0.00000  |
| Al | -8.06476  | 0.00000  | 0.00000  |
| Al | -5.56597  | 0.00000  | 0.00005  |
| C  | -3.60478  | -0.00010 | 0.00000  |
| H  | -3.38585  | 2.05130  | 0.67586  |
| H  | -3.38574  | -2.05148 | -0.67587 |
| C  | -2.86393  | 1.14646  | 0.37277  |
| C  | -2.86388  | -1.14661 | -0.37278 |
| C  | -1.46799  | 1.14966  | 0.37321  |
| C  | -1.46793  | -1.14974 | -0.37323 |
| H  | -0.93268  | 2.03882  | 0.69111  |
| H  | -0.93258  | -2.03887 | -0.69115 |
| C  | -0.74255  | -0.00002 | -0.00001 |
| C  | 0.74255   | 0.00002  | -0.00001 |
| H  | 0.93257   | 2.03887  | -0.69113 |
| H  | 0.93269   | -2.03882 | 0.69112  |
| C  | 1.46793   | 1.14974  | -0.37322 |
| C  | 1.46799   | -1.14966 | 0.37321  |
| C  | 2.86387   | 1.14662  | -0.37278 |
| C  | 2.86394   | -1.14646 | 0.37276  |
| H  | 3.38574   | 2.05149  | -0.67587 |
| H  | 3.38585   | -2.05130 | 0.67586  |
| C  | 3.60478   | 0.00010  | -0.00001 |
| Al | 5.56597   | 0.00002  | 0.00006  |
| Al | 8.06476   | 0.00000  | 0.00000  |
| Al | 10.56355  | 0.00000  | 0.00000  |
| Al | 13.06234  | 0.00000  | 0.00000  |

38

#3 Phenyl ring (p1-4)

|    |           |          |          |
|----|-----------|----------|----------|
| Al | -15.23090 | 0.00000  | 0.00000  |
| Al | -12.73211 | 0.00000  | 0.00000  |
| Al | -10.23332 | 0.00000  | 0.00000  |
| Al | -7.73453  | 0.00007  | -0.00010 |
| C  | -5.77386  | 0.00001  | -0.00005 |
| H  | -5.55502  | -2.12312 | -0.39540 |

|    |          |          |          |
|----|----------|----------|----------|
| H  | -5.55497 | 2.12314  | 0.39530  |
| C  | -5.03281 | -1.18586 | -0.21644 |
| C  | -5.03278 | 1.18587  | 0.21634  |
| C  | -3.63704 | -1.18856 | -0.21875 |
| C  | -3.63701 | 1.18855  | 0.21864  |
| H  | -3.10214 | -2.11185 | -0.41846 |
| H  | -3.10209 | 2.11183  | 0.41834  |
| C  | -2.91076 | -0.00001 | -0.00005 |
| C  | -1.42650 | -0.00002 | -0.00006 |
| H  | -1.22811 | -1.94900 | 0.91130  |
| H  | -1.22810 | 1.94897  | -0.91137 |
| C  | -0.69695 | 1.10044  | -0.49251 |
| C  | -0.69695 | -1.10048 | 0.49242  |
| C  | 0.69695  | 1.10044  | -0.49252 |
| C  | 0.69695  | -1.10048 | 0.49243  |
| H  | 1.22809  | -1.94901 | 0.91131  |
| H  | 1.22810  | 1.94898  | -0.91137 |
| C  | 1.42651  | -0.00002 | -0.00005 |
| C  | 2.91074  | -0.00001 | -0.00003 |
| H  | 3.10210  | 2.11224  | 0.41638  |
| H  | 3.10217  | -2.11224 | -0.41646 |
| C  | 3.63700  | 1.18875  | 0.21757  |
| C  | 3.63704  | -1.18875 | -0.21764 |
| C  | 5.03277  | 1.18608  | 0.21528  |
| C  | 5.03280  | -1.18604 | -0.21532 |
| H  | 5.55494  | 2.12353  | 0.39334  |
| H  | 5.55500  | -2.12347 | -0.39338 |
| C  | 5.77387  | 0.00003  | -0.00002 |
| Al | 7.73453  | 0.00004  | -0.00005 |
| Al | 10.23332 | 0.00000  | 0.00000  |
| Al | 12.73211 | 0.00000  | 0.00000  |
| Al | 15.23090 | 0.00000  | 0.00000  |

48

#4 Phenyl ring (p1-4)

|    |           |          |          |
|----|-----------|----------|----------|
| Al | -17.39745 | 0.00000  | 0.00000  |
| Al | -14.89866 | 0.00000  | 0.00000  |
| Al | -12.39987 | 0.00000  | 0.00000  |
| Al | -9.90108  | -0.00002 | 0.00000  |
| C  | -7.94045  | -0.00002 | 0.00001  |
| H  | -7.72249  | 2.15497  | -0.13750 |
| H  | -7.72248  | -2.15500 | 0.13752  |
| C  | -7.19964  | -1.20288 | 0.08150  |
| C  | -7.19964  | 1.20285  | -0.08149 |
| C  | -5.80389  | -1.20605 | 0.08141  |
| C  | -5.80389  | 1.20602  | -0.08140 |
| H  | -5.26845  | -2.14976 | 0.11732  |
| H  | -5.26845  | 2.14974  | -0.11731 |
| C  | -5.07786  | -0.00001 | 0.00001  |
| C  | -3.59368  | -0.00001 | 0.00000  |
| H  | -3.39424  | 1.64062  | -1.39236 |

|    |          |          |          |
|----|----------|----------|----------|
| H  | -3.39423 | -1.64063 | 1.39237  |
| C  | -2.86406 | -0.93258 | 0.76378  |
| C  | -2.86406 | 0.93257  | -0.76378 |
| C  | -1.46984 | 0.93307  | -0.76326 |
| C  | -1.46983 | -0.93307 | 0.76327  |
| H  | -0.93804 | 1.64176  | -1.39003 |
| H  | -0.93803 | -1.64176 | 1.39004  |
| C  | -0.74080 | 0.00000  | 0.00000  |
| C  | 0.74309  | 0.00000  | 0.00000  |
| H  | 0.93769  | 2.15122  | -0.01048 |
| H  | 0.93770  | -2.15122 | 0.01048  |
| C  | 1.47118  | 1.20604  | -0.01492 |
| C  | 1.47119  | -1.20603 | 0.01492  |
| C  | 2.86548  | 1.20616  | -0.01072 |
| C  | 2.86549  | -1.20615 | 0.01071  |
| H  | 3.39886  | 2.15109  | -0.03478 |
| H  | 3.39887  | -2.15108 | 0.03476  |
| C  | 3.59337  | 0.00001  | -0.00001 |
| C  | 5.07769  | 0.00001  | -0.00001 |
| H  | 5.26614  | -1.67781 | -1.34828 |
| H  | 5.26615  | 1.67782  | 1.34826  |
| C  | 5.80284  | -0.95191 | -0.74511 |
| C  | 5.80284  | 0.95193  | 0.74509  |
| C  | 7.19878  | -0.94856 | -0.74429 |
| C  | 7.19878  | 0.94858  | 0.74426  |
| H  | 7.72080  | -1.69359 | -1.34058 |
| H  | 7.72081  | 1.69362  | 1.34054  |
| C  | 7.93983  | 0.00001  | -0.00002 |
| Al | 9.90000  | 0.00005  | -0.00007 |
| Al | 12.39879 | 0.00000  | 0.00000  |
| Al | 14.89758 | 0.00000  | 0.00000  |
| Al | 17.39637 | 0.00000  | 0.00000  |

58

#5 Phenyl ring (p1-4)

|    |           |          |          |
|----|-----------|----------|----------|
| Al | -19.56596 | 0.00000  | 0.00000  |
| Al | -17.06717 | 0.00000  | 0.00000  |
| Al | -14.56838 | 0.00000  | 0.00000  |
| Al | -12.06959 | 0.00055  | -0.00102 |
| C  | -10.10905 | 0.00028  | -0.00079 |
| H  | -9.89133  | -2.15555 | -0.12491 |
| H  | -9.89077  | 2.15604  | 0.12338  |
| C  | -9.36836  | -1.20317 | -0.07483 |
| C  | -9.36805  | 1.20353  | 0.07320  |
| C  | -7.97263  | -1.20651 | -0.07472 |
| C  | -7.97232  | 1.20650  | 0.07296  |
| H  | -7.43737  | -2.15052 | -0.10470 |
| H  | -7.43680  | 2.15038  | 0.10290  |
| C  | -7.24634  | -0.00010 | -0.00093 |
| C  | -5.76216  | -0.00024 | -0.00091 |
| H  | -5.56277  | -1.65126 | -1.38094 |

|    |          |          |          |
|----|----------|----------|----------|
| H  | -5.56269 | 1.65071  | 1.37920  |
| C  | -5.03256 | -0.93861 | -0.75762 |
| C  | -5.03249 | 0.93799  | 0.75593  |
| C  | -3.63833 | -0.93923 | -0.75697 |
| C  | -3.63827 | 0.93828  | 0.75556  |
| H  | -3.10629 | -1.65264 | -1.37816 |
| H  | -3.10614 | 1.65154  | 1.37687  |
| C  | -2.90927 | -0.00058 | -0.00060 |
| C  | -1.42538 | -0.00070 | -0.00034 |
| H  | -1.23077 | 2.15046  | -0.01115 |
| H  | -1.23076 | -2.15187 | 0.01067  |
| C  | -0.69724 | -1.20672 | -0.00300 |
| C  | -0.69721 | 1.20533  | 0.00272  |
| C  | 0.69715  | -1.20673 | 0.00062  |
| C  | 0.69715  | 1.20533  | -0.00023 |
| H  | 1.23058  | -2.15189 | -0.01500 |
| H  | 1.23067  | 2.15044  | 0.01573  |
| C  | 1.42533  | -0.00072 | 0.00035  |
| C  | 2.90926  | -0.00058 | 0.00071  |
| H  | 3.10613  | 1.65466  | -1.37301 |
| H  | 3.10636  | -1.65586 | 1.37439  |
| C  | 3.63826  | 0.94005  | -0.75328 |
| C  | 3.63834  | -0.94100 | 0.75484  |
| C  | 5.03247  | 0.93980  | -0.75361 |
| C  | 5.03258  | -0.94037 | 0.75549  |
| H  | 5.56268  | 1.65392  | -1.37526 |
| H  | 5.56280  | -1.65444 | 1.37717  |
| C  | 5.76216  | -0.00017 | 0.00106  |
| C  | 7.24637  | 0.00000  | 0.00108  |
| H  | 7.43685  | 2.15076  | -0.09689 |
| H  | 7.43743  | -2.15070 | 0.09913  |
| C  | 7.97236  | 1.20680  | -0.06953 |
| C  | 7.97267  | -1.20660 | 0.07172  |
| C  | 9.36809  | 1.20383  | -0.06969 |
| C  | 9.36840  | -1.20325 | 0.07186  |
| H  | 9.89081  | 2.15648  | -0.11722 |
| H  | 9.89139  | -2.15575 | 0.11935  |
| C  | 10.10908 | 0.00039  | 0.00109  |
| Al | 12.06963 | 0.00042  | 0.00155  |
| Al | 14.56842 | 0.00000  | 0.00000  |
| Al | 17.06721 | 0.00000  | 0.00000  |
| Al | 19.56600 | 0.00000  | 0.00000  |

### **P1 Electrodes (6-layer)**

22

#1 Phenyl ring (p1-6)

|    |           |         |         |
|----|-----------|---------|---------|
| Al | -15.89469 | 0.00000 | 0.00000 |
| Al | -13.39590 | 0.00000 | 0.00000 |
| Al | -10.89711 | 0.00000 | 0.00000 |
| Al | -8.39832  | 0.00000 | 0.00000 |
| Al | -5.89953  | 0.00000 | 0.00000 |

|    |          |         |          |
|----|----------|---------|----------|
| Al | -3.40074 | 0.00000 | 0.00000  |
| C  | -1.43445 | 0.00000 | 0.00000  |
| H  | -1.22681 | 0.00000 | 2.16066  |
| H  | -1.22681 | 0.00000 | -2.16066 |
| C  | -0.69922 | 0.00000 | 1.20903  |
| C  | -0.69922 | 0.00000 | -1.20904 |
| C  | 0.69922  | 0.00000 | 1.20903  |
| C  | 0.69922  | 0.00000 | -1.20904 |
| H  | 1.22681  | 0.00000 | 2.16066  |
| H  | 1.22681  | 0.00000 | -2.16066 |
| C  | 1.43445  | 0.00000 | 0.00000  |
| Al | 3.40074  | 0.00000 | 0.00000  |
| Al | 5.89953  | 0.00000 | 0.00000  |
| Al | 8.39832  | 0.00000 | 0.00000  |
| Al | 10.89711 | 0.00000 | 0.00000  |
| Al | 13.39590 | 0.00000 | 0.00000  |
| Al | 15.89469 | 0.00000 | 0.00000  |

32

#2 Phenyl ring (p1-6)

|    |           |          |          |
|----|-----------|----------|----------|
| Al | -18.05992 | 0.00000  | 0.00000  |
| Al | -15.56113 | 0.00000  | 0.00000  |
| Al | -13.06234 | 0.00000  | 0.00000  |
| Al | -10.56355 | 0.00000  | 0.00000  |
| Al | -8.06476  | 0.00000  | 0.00000  |
| Al | -5.56597  | 0.00000  | 0.00005  |
| C  | -3.60478  | -0.00010 | 0.00000  |
| H  | -3.38585  | 2.05130  | 0.67586  |
| H  | -3.38574  | -2.05148 | -0.67587 |
| C  | -2.86393  | 1.14646  | 0.37277  |
| C  | -2.86388  | -1.14661 | -0.37278 |
| C  | -1.46799  | 1.14966  | 0.37321  |
| C  | -1.46793  | -1.14974 | -0.37323 |
| H  | -0.93268  | 2.03882  | 0.69111  |
| H  | -0.93258  | -2.03887 | -0.69115 |
| C  | -0.74255  | -0.00002 | -0.00001 |
| C  | 0.74255   | 0.00002  | -0.00001 |
| H  | 0.93257   | 2.03887  | -0.69113 |
| H  | 0.93269   | -2.03882 | 0.69112  |
| C  | 1.46793   | 1.14974  | -0.37322 |
| C  | 1.46799   | -1.14966 | 0.37321  |
| C  | 2.86387   | 1.14662  | -0.37278 |
| C  | 2.86394   | -1.14646 | 0.37276  |
| H  | 3.38574   | 2.05149  | -0.67587 |
| H  | 3.38585   | -2.05130 | 0.67586  |
| C  | 3.60478   | 0.00010  | -0.00001 |
| Al | 5.56597   | 0.00002  | 0.00006  |
| Al | 8.06476   | 0.00000  | 0.00000  |
| Al | 10.56355  | 0.00000  | 0.00000  |
| Al | 13.06234  | 0.00000  | 0.00000  |
| Al | 15.56113  | 0.00000  | 0.00000  |

|    |          |         |         |
|----|----------|---------|---------|
| Al | 18.05992 | 0.00000 | 0.00000 |
|----|----------|---------|---------|

42

#3 Phenyl ring (p1-6)

|    |           |          |          |
|----|-----------|----------|----------|
| Al | -20.22848 | 0.00000  | 0.00000  |
| Al | -17.72969 | 0.00000  | 0.00000  |
| Al | -15.23090 | 0.00000  | 0.00000  |
| Al | -12.73211 | 0.00000  | 0.00000  |
| Al | -10.23332 | 0.00000  | 0.00000  |
| Al | -7.73453  | 0.00007  | -0.00010 |
| C  | -5.77386  | 0.00001  | -0.00005 |
| H  | -5.55502  | -2.12312 | -0.39540 |
| H  | -5.55497  | 2.12314  | 0.39530  |
| C  | -5.03281  | -1.18586 | -0.21644 |
| C  | -5.03278  | 1.18587  | 0.21634  |
| C  | -3.63704  | -1.18856 | -0.21875 |
| C  | -3.63701  | 1.18855  | 0.21864  |
| H  | -3.10214  | -2.11185 | -0.41846 |
| H  | -3.10209  | 2.11183  | 0.41834  |
| C  | -2.91076  | -0.00001 | -0.00005 |
| C  | -1.42650  | -0.00002 | -0.00006 |
| H  | -1.22811  | -1.94900 | 0.91130  |
| H  | -1.22810  | 1.94897  | -0.91137 |
| C  | -0.69695  | -1.10048 | 0.49242  |
| C  | -0.69695  | 1.10044  | -0.49251 |
| C  | 0.69695   | -1.10048 | 0.49243  |
| C  | 0.69695   | 1.10044  | -0.49252 |
| H  | 1.22809   | -1.94901 | 0.91131  |
| H  | 1.22810   | 1.94898  | -0.91137 |
| C  | 1.42651   | -0.00002 | -0.00005 |
| C  | 2.91074   | -0.00001 | -0.00003 |
| H  | 3.10210   | 2.11224  | 0.41638  |
| H  | 3.10217   | -2.11224 | -0.41646 |
| C  | 3.63700   | 1.18875  | 0.21757  |
| C  | 3.63704   | -1.18875 | -0.21764 |
| C  | 5.03277   | 1.18608  | 0.21528  |
| C  | 5.03280   | -1.18604 | -0.21532 |
| H  | 5.55494   | 2.12353  | 0.39334  |
| H  | 5.55500   | -2.12347 | -0.39338 |
| C  | 5.77387   | 0.00003  | -0.00002 |
| Al | 7.73453   | 0.00004  | -0.00005 |
| Al | 10.23332  | 0.00000  | 0.00000  |
| Al | 12.73211  | 0.00000  | 0.00000  |
| Al | 15.23090  | 0.00000  | 0.00000  |
| Al | 17.72969  | 0.00000  | 0.00000  |
| Al | 20.22848  | 0.00000  | 0.00000  |

52

#4 Phenyl ring (p1-6)

|    |           |         |         |
|----|-----------|---------|---------|
| Al | -22.39503 | 0.00000 | 0.00000 |
| Al | -19.89624 | 0.00000 | 0.00000 |

|    |           |          |          |
|----|-----------|----------|----------|
| Al | -17.39745 | 0.00000  | 0.00000  |
| Al | -14.89866 | 0.00000  | 0.00000  |
| Al | -12.39987 | 0.00000  | 0.00000  |
| Al | -9.90108  | -0.00002 | 0.00000  |
| C  | -7.94045  | -0.00002 | 0.00001  |
| H  | -7.72249  | 2.15497  | -0.13750 |
| H  | -7.72248  | -2.15500 | 0.13752  |
| C  | -7.19964  | 1.20285  | -0.08149 |
| C  | -7.19964  | -1.20288 | 0.08150  |
| C  | -5.80389  | 1.20602  | -0.08140 |
| C  | -5.80389  | -1.20605 | 0.08141  |
| H  | -5.26845  | 2.14974  | -0.11731 |
| H  | -5.26845  | -2.14976 | 0.11732  |
| C  | -5.07786  | -0.00001 | 0.00001  |
| C  | -3.59368  | -0.00001 | 0.00000  |
| H  | -3.39424  | 1.64062  | -1.39236 |
| H  | -3.39423  | -1.64063 | 1.39237  |
| C  | -2.86406  | 0.93257  | -0.76378 |
| C  | -2.86406  | -0.93258 | 0.76378  |
| C  | -1.46984  | 0.93307  | -0.76326 |
| C  | -1.46983  | -0.93307 | 0.76327  |
| H  | -0.93804  | 1.64176  | -1.39003 |
| H  | -0.93803  | -1.64176 | 1.39004  |
| C  | -0.74080  | 0.00000  | 0.00000  |
| C  | 0.74309   | 0.00000  | 0.00000  |
| H  | 0.93769   | 2.15122  | -0.01048 |
| H  | 0.93770   | -2.15122 | 0.01048  |
| C  | 1.47118   | 1.20604  | -0.01492 |
| C  | 1.47119   | -1.20603 | 0.01492  |
| C  | 2.86548   | 1.20616  | -0.01072 |
| C  | 2.86549   | -1.20615 | 0.01071  |
| H  | 3.39886   | 2.15109  | -0.03478 |
| H  | 3.39887   | -2.15108 | 0.03476  |
| C  | 3.59337   | 0.00001  | -0.00001 |
| C  | 5.07769   | 0.00001  | -0.00001 |
| H  | 5.26614   | -1.67781 | -1.34828 |
| H  | 5.26615   | 1.67782  | 1.34826  |
| C  | 5.80284   | 0.95193  | 0.74509  |
| C  | 5.80284   | -0.95191 | -0.74511 |
| C  | 7.19878   | 0.94858  | 0.74426  |
| C  | 7.19878   | -0.94856 | -0.74429 |
| H  | 7.72080   | -1.69359 | -1.34058 |
| H  | 7.72081   | 1.69362  | 1.34054  |
| C  | 7.93983   | 0.00001  | -0.00002 |
| Al | 9.90000   | 0.00005  | -0.00007 |
| Al | 12.39879  | 0.00000  | 0.00000  |
| Al | 14.89758  | 0.00000  | 0.00000  |
| Al | 17.39637  | 0.00000  | 0.00000  |
| Al | 19.89516  | 0.00000  | 0.00000  |

|    |          |         |         |
|----|----------|---------|---------|
| Al | 22.39395 | 0.00000 | 0.00000 |
|----|----------|---------|---------|

62

#5 Phenyl ring (p1-6)

|    |           |          |          |
|----|-----------|----------|----------|
| Al | -24.56354 | 0.00000  | 0.00000  |
| Al | -22.06475 | 0.00000  | 0.00000  |
| Al | -19.56596 | 0.00000  | 0.00000  |
| Al | -17.06717 | 0.00000  | 0.00000  |
| Al | -14.56838 | 0.00000  | 0.00000  |
| Al | -12.06959 | 0.00055  | -0.00102 |
| C  | -10.10905 | 0.00028  | -0.00079 |
| H  | -9.89133  | -2.15555 | -0.12491 |
| H  | -9.89077  | 2.15604  | 0.12338  |
| C  | -9.36836  | -1.20317 | -0.07483 |
| C  | -9.36805  | 1.20353  | 0.07320  |
| C  | -7.97263  | -1.20651 | -0.07472 |
| C  | -7.97232  | 1.20650  | 0.07296  |
| H  | -7.43737  | -2.15052 | -0.10470 |
| H  | -7.43680  | 2.15038  | 0.10290  |
| C  | -7.24634  | -0.00010 | -0.00093 |
| C  | -5.76216  | -0.00024 | -0.00091 |
| H  | -5.56277  | -1.65126 | -1.38094 |
| H  | -5.56269  | 1.65071  | 1.37920  |
| C  | -5.03256  | -0.93861 | -0.75762 |
| C  | -5.03249  | 0.93799  | 0.75593  |
| C  | -3.63833  | -0.93923 | -0.75697 |
| C  | -3.63827  | 0.93828  | 0.75556  |
| H  | -3.10629  | -1.65264 | -1.37816 |
| H  | -3.10614  | 1.65154  | 1.37687  |
| C  | -2.90927  | -0.00058 | -0.00060 |
| C  | -1.42538  | -0.00070 | -0.00034 |
| H  | -1.23077  | 2.15046  | -0.01115 |
| H  | -1.23076  | -2.15187 | 0.01067  |
| C  | -0.69724  | -1.20672 | -0.00300 |
| C  | -0.69721  | 1.20533  | 0.00272  |
| C  | 0.69715   | 1.20533  | -0.00023 |
| C  | 0.69715   | -1.20673 | 0.00062  |
| H  | 1.23058   | -2.15189 | -0.01500 |
| H  | 1.23067   | 2.15044  | 0.01573  |
| C  | 1.42533   | -0.00072 | 0.00035  |
| C  | 2.90926   | -0.00058 | 0.00071  |
| H  | 3.10613   | 1.65466  | -1.37301 |
| H  | 3.10636   | -1.65586 | 1.37439  |
| C  | 3.63826   | 0.94005  | -0.75328 |
| C  | 3.63834   | -0.94100 | 0.75484  |
| C  | 5.03247   | 0.93980  | -0.75361 |
| C  | 5.03258   | -0.94037 | 0.75549  |
| H  | 5.56268   | 1.65392  | -1.37526 |
| H  | 5.56280   | -1.65444 | 1.37717  |
| C  | 5.76216   | -0.00017 | 0.00106  |
| C  | 7.24637   | 0.00000  | 0.00108  |



|    |          |          |          |
|----|----------|----------|----------|
| H  | 7.43685  | 2.15076  | -0.09689 |
| H  | 7.43743  | -2.15070 | 0.09913  |
| C  | 7.97236  | 1.20680  | -0.06953 |
| C  | 7.97267  | -1.20660 | 0.07172  |
| C  | 9.36809  | 1.20383  | -0.06969 |
| C  | 9.36840  | -1.20325 | 0.07186  |
| H  | 9.89081  | 2.15648  | -0.11722 |
| H  | 9.89139  | -2.15575 | 0.11935  |
| C  | 10.10908 | 0.00039  | 0.00109  |
| Al | 12.06963 | 0.00042  | 0.00155  |
| Al | 14.56842 | 0.00000  | 0.00000  |
| Al | 17.06721 | 0.00000  | 0.00000  |
| Al | 19.56600 | 0.00000  | 0.00000  |
| Al | 22.06479 | 0.00000  | 0.00000  |
| Al | 24.56358 | 0.00000  | 0.00000  |

**pX2 Electrodes (1-layer)**

16

#1 Phenyl ring (pX2)

|    |               |              |               |
|----|---------------|--------------|---------------|
| Al | -3.9631700000 | 0.0000000000 | 1.6494700000  |
| Al | -3.9631600000 | 0.0000000000 | -1.6494700000 |
| C  | -2.8741900000 | 0.0000000000 | 0.0000000000  |
| C  | -1.4749400000 | 0.0000000000 | 0.0000000000  |
| H  | -1.2100400000 | 0.0000000000 | -2.1746500000 |
| H  | -1.2100400000 | 0.0000000000 | 2.1746500000  |
| C  | -0.6795700000 | 0.0000000000 | -1.2285700000 |
| C  | -0.6795700000 | 0.0000000000 | 1.2285700000  |
| C  | 0.6795700000  | 0.0000000000 | -1.2285700000 |
| C  | 0.6795700000  | 0.0000000000 | 1.2285700000  |
| H  | 1.2100400000  | 0.0000000000 | -2.1746500000 |
| H  | 1.2100400000  | 0.0000000000 | 2.1746500000  |
| C  | 1.4749400000  | 0.0000000000 | 0.0000000000  |
| C  | 2.8741900000  | 0.0000000000 | 0.0000000000  |
| Al | 3.9631600000  | 0.0000000000 | -1.6494700000 |
| Al | 3.9631700000  | 0.0000000000 | 1.6494700000  |

26

#2 Phenyl ring (pX2)

|    |               |               |               |
|----|---------------|---------------|---------------|
| Al | -6.1382800000 | 1.6418100000  | -0.0000200000 |
| Al | -6.1377300000 | -1.6425700000 | -0.0000100000 |
| C  | -5.0488800000 | -0.0002000000 | -0.0000100000 |
| C  | -3.6398800000 | 0.0000400000  | -0.0000100000 |
| H  | -3.3740700000 | 2.1689800000  | -0.0000100000 |
| H  | -3.3733500000 | -2.1688200000 | -0.0000100000 |
| C  | -2.8482500000 | 1.2207300000  | -0.0000100000 |
| C  | -2.8478500000 | -1.2203900000 | -0.0000100000 |
| C  | -1.4822800000 | 1.2199000000  | -0.0000100000 |
| C  | -1.4818800000 | -1.2191100000 | -0.0000100000 |
| H  | -0.9734900000 | 2.1754900000  | -0.0000100000 |
| H  | -0.9727000000 | -2.1745100000 | -0.0000100000 |

|    |               |               |               |
|----|---------------|---------------|---------------|
| C  | -0.7103400000 | 0.0005100000  | -0.0000100000 |
| C  | 0.7103400000  | 0.0005100000  | -0.0000100000 |
| H  | 0.9727000000  | -2.1745100000 | -0.0000100000 |
| H  | 0.9734900000  | 2.1754900000  | -0.0000100000 |
| C  | 1.4818800000  | -1.2191100000 | -0.0000100000 |
| C  | 1.4822800000  | 1.2199000000  | -0.0000100000 |
| C  | 2.8478500000  | -1.2203900000 | -0.0000100000 |
| C  | 2.8482500000  | 1.2207300000  | -0.0000100000 |
| H  | 3.3733500000  | -2.1688200000 | -0.0000100000 |
| H  | 3.3740700000  | 2.1689800000  | -0.0000100000 |
| C  | 3.6398800000  | 0.0000400000  | -0.0000100000 |
| C  | 5.0488800000  | -0.0002000000 | -0.0000100000 |
| Al | 6.1377300000  | -1.6425700000 | -0.0000200000 |
| Al | 6.1382800000  | 1.6418100000  | -0.0000200000 |

36

#3 Phenyl ring (pX2)

|    |               |               |               |
|----|---------------|---------------|---------------|
| Al | -8.3196900000 | -1.6374400000 | 0.0000000000  |
| Al | -8.3187200000 | 1.6393300000  | 0.0000000000  |
| C  | -7.2293200000 | 0.0006200000  | -0.0000100000 |
| C  | -5.8132300000 | 0.0002000000  | -0.0000100000 |
| H  | -5.5504900000 | -2.1660900000 | -0.0000100000 |
| H  | -5.5492000000 | 2.1663300000  | -0.0000100000 |
| C  | -5.0256700000 | -1.2172500000 | -0.0000100000 |
| C  | -5.0249500000 | 1.2171800000  | -0.0000100000 |
| C  | -3.6551600000 | -1.2154800000 | -0.0000200000 |
| C  | -3.6544300000 | 1.2145900000  | -0.0000200000 |
| H  | -3.1468400000 | -2.1717000000 | -0.0000200000 |
| H  | -3.1454800000 | 2.1704900000  | -0.0000200000 |
| C  | -2.8899900000 | -0.0006600000 | -0.0000200000 |
| C  | -1.4529000000 | -0.0008800000 | -0.0000200000 |
| H  | -1.1924500000 | 2.1666700000  | -0.0000200000 |
| H  | -1.1924000000 | -2.1684800000 | -0.0000200000 |
| C  | -0.6874100000 | -1.2111800000 | -0.0000200000 |
| C  | -0.6874100000 | 1.2093800000  | -0.0000200000 |
| C  | 0.6874100000  | -1.2111800000 | -0.0000200000 |
| C  | 0.6874100000  | 1.2093800000  | -0.0000200000 |
| H  | 1.1923900000  | -2.1684800000 | -0.0000200000 |
| H  | 1.1924500000  | 2.1666700000  | -0.0000200000 |
| C  | 1.4529000000  | -0.0008800000 | -0.0000200000 |
| C  | 2.8899900000  | -0.0006700000 | -0.0000200000 |
| H  | 3.1454800000  | 2.1704800000  | -0.0000200000 |
| H  | 3.1468400000  | -2.1717000000 | -0.0000100000 |
| C  | 3.6544300000  | 1.2145900000  | -0.0000200000 |
| C  | 3.6551600000  | -1.2154800000 | -0.0000100000 |
| C  | 5.0249500000  | 1.2171800000  | -0.0000200000 |
| C  | 5.0256700000  | -1.2172500000 | -0.0000100000 |
| H  | 5.5492000000  | 2.1663300000  | -0.0000100000 |
| H  | 5.5504900000  | -2.1660900000 | -0.0000100000 |
| C  | 5.8132300000  | 0.0002000000  | -0.0000100000 |
| C  | 7.2293200000  | 0.0006200000  | -0.0000100000 |

|    |             |              |             |
|----|-------------|--------------|-------------|
| Al | 8.318720000 | 1.639330000  | 0.000000000 |
| Al | 8.319690000 | -1.637440000 | 0.000010000 |

46

#4 Phenyl ring (pX2)

|    |           |          |         |
|----|-----------|----------|---------|
| Al | 10.52941  | -1.71596 | 0.00000 |
| Al | 10.52555  | 1.72723  | 0.00000 |
| C  | 9.44798   | 0.00443  | 0.00000 |
| C  | 8.02552   | 0.00279  | 0.00000 |
| H  | 7.75423   | -2.16464 | 0.00000 |
| H  | 7.74909   | 2.16962  | 0.00000 |
| C  | 7.23355   | -1.21015 | 0.00000 |
| C  | 7.23071   | 1.21388  | 0.00000 |
| C  | 5.85925   | -1.21138 | 0.00000 |
| C  | 5.85642   | 1.21184  | 0.00000 |
| H  | 5.35126   | -2.16802 | 0.00000 |
| H  | 5.34618   | 2.16727  | 0.00000 |
| C  | 5.09792   | -0.00066 | 0.00000 |
| C  | 3.64661   | -0.00233 | 0.00000 |
| H  | 3.39243   | -2.16636 | 0.00000 |
| H  | 3.38754   | 2.16112  | 0.00000 |
| C  | 2.88814   | -1.20834 | 0.00000 |
| C  | 2.88541   | 1.20196  | 0.00000 |
| C  | 1.50676   | -1.20899 | 0.00000 |
| C  | 1.50404   | 1.19945  | 0.00000 |
| H  | 1.00365   | -2.16782 | 0.00000 |
| H  | 0.99876   | 2.15713  | 0.00000 |
| C  | 0.74822   | -0.00563 | 0.00000 |
| C  | -0.71062  | -0.00733 | 0.00000 |
| H  | -0.96104  | -2.17010 | 0.00000 |
| H  | -0.96618  | 2.15485  | 0.00000 |
| C  | -1.46638  | -1.21244 | 0.00000 |
| C  | -1.46923  | 1.19599  | 0.00000 |
| C  | -2.84776  | -1.21503 | 0.00000 |
| C  | -2.85061  | 1.19526  | 0.00000 |
| H  | -3.34979  | -2.17423 | 0.00000 |
| H  | -3.35495  | 2.15325  | 0.00000 |
| C  | -3.60904  | -0.01078 | 0.00000 |
| C  | -5.06037  | -0.01246 | 0.00000 |
| H  | -5.30877  | -2.18039 | 0.00000 |
| H  | -5.31360  | 2.15489  | 0.00000 |
| C  | -5.81894  | -1.22492 | 0.00000 |
| C  | -5.82166  | 1.19829  | 0.00000 |
| C  | -7.19323  | -1.22687 | 0.00000 |
| C  | -7.19595  | 1.19716  | 0.00000 |
| H  | -7.71170  | -2.18257 | 0.00000 |
| H  | -7.71659  | 2.15167  | 0.00000 |
| C  | -7.98797  | -0.01574 | 0.00000 |
| C  | -9.41045  | -0.01735 | 0.00000 |
| Al | -10.49191 | 1.70260  | 0.00000 |

Al -10.48827 -1.73974 0.00000

56

#5 Phenyl ring (pX2)

|    |                |               |               |
|----|----------------|---------------|---------------|
| Al | -12.7010800000 | -1.6302000000 | -0.0000600000 |
| Al | -12.7002700000 | 1.6399900000  | -0.0004200000 |
| C  | -11.6088400000 | 0.0046500000  | -0.0001600000 |
| C  | -10.1826200000 | 0.0043300000  | -0.0000600000 |
| H  | -9.9243700000  | -2.1586400000 | 0.0001600000  |
| H  | -9.9236900000  | 2.1672300000  | -0.0002200000 |
| C  | -9.4010500000  | -1.2088800000 | 0.0001000000  |
| C  | -9.4006600000  | 1.2173000000  | -0.0001100000 |
| C  | -8.0242700000  | -1.2060000000 | 0.0001700000  |
| C  | -8.0238800000  | 1.2139800000  | -0.0000300000 |
| H  | -7.5158500000  | -2.1623600000 | 0.0002900000  |
| H  | -7.5151200000  | 2.1701600000  | -0.0000800000 |
| C  | -7.2676300000  | 0.0038700000  | 0.0001100000  |
| C  | -5.8082800000  | 0.0037600000  | 0.0001700000  |
| H  | -5.5556900000  | 2.1655900000  | 0.0001200000  |
| H  | -5.5556200000  | -2.1580900000 | 0.0002500000  |
| C  | -5.0523500000  | 1.2071400000  | 0.0001600000  |
| C  | -5.0523400000  | -1.1996200000 | 0.0002400000  |
| C  | -3.6677700000  | 1.2059300000  | 0.0002000000  |
| C  | -3.6677600000  | -1.1983900000 | 0.0002800000  |
| H  | -3.1635700000  | 2.1642200000  | 0.0001900000  |
| H  | -3.1635500000  | -2.1566700000 | 0.0003200000  |
| C  | -2.9152500000  | 0.0037700000  | 0.0002600000  |
| C  | -1.4451300000  | 0.0037800000  | 0.0002800000  |
| H  | -1.1965700000  | -2.1562000000 | 0.0003400000  |
| H  | -1.1965600000  | 2.1637500000  | 0.0002200000  |
| C  | -0.6931400000  | -1.1975100000 | 0.0003200000  |
| C  | -0.6931300000  | 1.2050600000  | 0.0002500000  |
| C  | 0.6931300000   | -1.1975100000 | 0.0003200000  |
| C  | 0.6931400000   | 1.2050600000  | 0.0002500000  |
| H  | 1.1965600000   | -2.1562100000 | 0.0003500000  |
| H  | 1.1965800000   | 2.1637500000  | 0.0002300000  |
| C  | 1.4451300000   | 0.0037700000  | 0.0002800000  |
| C  | 2.9152500000   | 0.0037500000  | 0.0002600000  |
| H  | 3.1635300000   | -2.1566900000 | 0.0003400000  |
| H  | 3.1635900000   | 2.1642000000  | 0.0001900000  |
| C  | 3.6677500000   | -1.1984100000 | 0.0002900000  |
| C  | 3.6677800000   | 1.2059100000  | 0.0002000000  |
| C  | 5.0523300000   | -1.1996500000 | 0.0002500000  |
| C  | 5.0523600000   | 1.2071100000  | 0.0001600000  |
| H  | 5.5556100000   | -2.1581200000 | 0.0002600000  |
| H  | 5.5557100000   | 2.1655500000  | 0.0001200000  |
| C  | 5.8082800000   | 0.0037200000  | 0.0001800000  |
| C  | 7.2676300000   | 0.0038200000  | 0.0001200000  |
| H  | 7.5151400000   | 2.1701100000  | -0.0000600000 |
| H  | 7.5158400000   | -2.1624100000 | 0.0002800000  |
| C  | 8.0238900000   | 1.2139300000  | -0.0000100000 |

|    |               |               |               |
|----|---------------|---------------|---------------|
| C  | 8.0242600000  | -1.2060600000 | 0.0001700000  |
| C  | 9.4006700000  | 1.2172400000  | -0.0001000000 |
| C  | 9.4010400000  | -1.2089500000 | 0.0000900000  |
| H  | 9.9237100000  | 2.1671600000  | -0.0002000000 |
| H  | 9.9243500000  | -2.1587100000 | 0.0001400000  |
| C  | 10.1826200000 | 0.0042700000  | -0.0000600000 |
| C  | 11.6088400000 | 0.0045700000  | -0.0001600000 |
| Al | 12.7002700000 | 1.6399100000  | -0.0004200000 |
| Al | 12.7010700000 | -1.6302900000 | -0.0000700000 |

### pX2 Electrodes (2-layer)

20

#1 Phenyl ring (pX2-2)

|    |          |         |          |
|----|----------|---------|----------|
| Al | -6.46196 | 0.00000 | 1.64947  |
| Al | -6.46196 | 0.00000 | -1.64947 |
| Al | -3.96317 | 0.00000 | 1.64947  |
| Al | -3.96316 | 0.00000 | -1.64947 |
| C  | -2.87419 | 0.00000 | 0.00000  |
| C  | -1.47494 | 0.00000 | 0.00000  |
| H  | -1.21004 | 0.00000 | 2.17465  |
| H  | -1.21004 | 0.00000 | -2.17465 |
| C  | -0.67957 | 0.00000 | 1.22857  |
| C  | -0.67957 | 0.00000 | -1.22857 |
| C  | 0.67957  | 0.00000 | 1.22857  |
| C  | 0.67957  | 0.00000 | -1.22857 |
| H  | 1.21004  | 0.00000 | 2.17465  |
| H  | 1.21004  | 0.00000 | -2.17465 |
| C  | 1.47494  | 0.00000 | 0.00000  |
| C  | 2.87419  | 0.00000 | 0.00000  |
| Al | 3.96316  | 0.00000 | -1.64947 |
| Al | 3.96317  | 0.00000 | 1.64947  |
| Al | 6.46195  | 0.00000 | -1.64947 |
| Al | 6.46195  | 0.00000 | 1.64947  |

30

#2 Phenyl rings (pX2-2)

|    |          |          |          |
|----|----------|----------|----------|
| Al | -8.63707 | 1.64181  | -0.00002 |
| Al | -8.63707 | -1.64257 | -0.00001 |
| Al | -6.13828 | 1.64181  | -0.00002 |
| Al | -6.13773 | -1.64257 | -0.00001 |
| C  | -5.04888 | -0.00020 | -0.00001 |
| C  | -3.63988 | 0.00004  | -0.00001 |
| H  | -3.37407 | 2.16898  | -0.00001 |
| H  | -3.37335 | -2.16882 | -0.00001 |
| C  | -2.84825 | 1.22073  | -0.00001 |
| C  | -2.84785 | -1.22039 | -0.00001 |
| C  | -1.48228 | 1.21990  | -0.00001 |
| C  | -1.48188 | -1.21911 | -0.00001 |

|    |          |          |          |
|----|----------|----------|----------|
| H  | -0.97349 | 2.17549  | -0.00001 |
| H  | -0.97270 | -2.17451 | -0.00001 |
| C  | -0.71034 | 0.00051  | -0.00001 |
| C  | 0.71034  | 0.00051  | -0.00001 |
| H  | 0.97270  | -2.17451 | -0.00001 |
| H  | 0.97349  | 2.17549  | -0.00001 |
| C  | 1.48188  | -1.21911 | -0.00001 |
| C  | 1.48228  | 1.21990  | -0.00001 |
| C  | 2.84785  | -1.22039 | -0.00001 |
| C  | 2.84825  | 1.22073  | -0.00001 |
| H  | 3.37335  | -2.16882 | -0.00001 |
| H  | 3.37407  | 2.16898  | -0.00001 |
| C  | 3.63988  | 0.00004  | -0.00001 |
| C  | 5.04888  | -0.00020 | -0.00001 |
| Al | 6.13773  | -1.64257 | -0.00002 |
| Al | 6.13828  | 1.64181  | -0.00002 |
| Al | 8.63707  | 1.64181  | -0.00002 |
| Al | 8.63707  | -1.64257 | -0.00002 |

40

#3 Phenyl rings (pX2-2)

|    |          |          |         |
|----|----------|----------|---------|
| Al | 13.02820 | -1.71596 | 0.00000 |
| Al | 13.02434 | 1.72723  | 0.00000 |
| Al | 10.52941 | -1.71596 | 0.00000 |
| Al | 10.52555 | 1.72723  | 0.00000 |
| C  | 9.44798  | 0.00443  | 0.00000 |
| C  | 8.02552  | 0.00279  | 0.00000 |
| H  | 7.75423  | -2.16464 | 0.00000 |
| H  | 7.74909  | 2.16962  | 0.00000 |
| C  | 7.23355  | -1.21015 | 0.00000 |
| C  | 7.23071  | 1.21388  | 0.00000 |
| C  | 5.85925  | -1.21138 | 0.00000 |
| C  | 5.85642  | 1.21184  | 0.00000 |
| H  | 5.35126  | -2.16802 | 0.00000 |
| H  | 5.34618  | 2.16727  | 0.00000 |
| C  | 5.09792  | -0.00066 | 0.00000 |
| C  | 3.64661  | -0.00233 | 0.00000 |
| H  | 3.39243  | -2.16636 | 0.00000 |
| H  | 3.38754  | 2.16112  | 0.00000 |
| C  | 2.88814  | -1.20834 | 0.00000 |
| C  | 2.88541  | 1.20196  | 0.00000 |
| C  | 1.50676  | -1.20899 | 0.00000 |
| C  | 1.50404  | 1.19945  | 0.00000 |
| H  | 1.00365  | -2.16782 | 0.00000 |
| H  | 0.99876  | 2.15713  | 0.00000 |
| C  | 0.74822  | -0.00563 | 0.00000 |
| C  | -0.71062 | -0.00733 | 0.00000 |
| H  | -0.96104 | -2.17010 | 0.00000 |
| H  | -0.96618 | 2.15485  | 0.00000 |
| C  | -1.46638 | -1.21244 | 0.00000 |
| C  | -1.46923 | 1.19599  | 0.00000 |

|    |           |          |         |
|----|-----------|----------|---------|
| C  | -2.84776  | -1.21503 | 0.00000 |
| C  | -2.85061  | 1.19526  | 0.00000 |
| H  | -3.34979  | -2.17423 | 0.00000 |
| H  | -3.35495  | 2.15325  | 0.00000 |
| C  | -3.60904  | -0.01078 | 0.00000 |
| C  | -5.06037  | -0.01246 | 0.00000 |
| H  | -5.30877  | -2.18039 | 0.00000 |
| H  | -5.31360  | 2.15489  | 0.00000 |
| C  | -5.81894  | -1.22492 | 0.00000 |
| C  | -5.82166  | 1.19829  | 0.00000 |
| C  | -7.19323  | -1.22687 | 0.00000 |
| C  | -7.19595  | 1.19716  | 0.00000 |
| H  | -7.71170  | -2.18257 | 0.00000 |
| H  | -7.71659  | 2.15167  | 0.00000 |
| C  | -7.98797  | -0.01574 | 0.00000 |
| C  | -9.41045  | -0.01735 | 0.00000 |
| Al | -10.49191 | 1.70260  | 0.00000 |
| Al | -10.48827 | -1.73974 | 0.00000 |
| Al | -12.99070 | 1.70260  | 0.00000 |
| Al | -12.98710 | -1.73974 | 0.00000 |

50

#4 Phenyl ring (pX2-2)

|    |           |          |          |
|----|-----------|----------|----------|
| Al | -12.99025 | -1.61944 | 0.23980  |
| Al | -12.98898 | 1.61808  | -0.24469 |
| Al | -10.49146 | -1.61944 | 0.23980  |
| Al | -10.49019 | 1.61808  | -0.24469 |
| C  | -9.39923  | -0.00059 | -0.00018 |
| C  | -7.97466  | -0.00088 | -0.00056 |
| H  | -7.71859  | 2.14291  | -0.29610 |
| H  | -7.71856  | -2.14471 | 0.29464  |
| C  | -7.19343  | -1.20602 | 0.15723  |
| C  | -7.19339  | 1.20433  | -0.15789 |
| C  | -5.81741  | -1.20392 | 0.15158  |
| C  | -5.81741  | 1.20238  | -0.15169 |
| H  | -5.29900  | -2.14343 | 0.30514  |
| H  | -5.29897  | 2.14190  | -0.30514 |
| C  | -5.06500  | -0.00076 | 0.00013  |
| C  | -3.61139  | -0.00063 | 0.00036  |
| H  | -3.37686  | 2.11567  | 0.43733  |
| H  | -3.37607  | -2.11688 | -0.43656 |
| C  | -2.86140  | 1.18821  | 0.21868  |
| C  | -2.86098  | -1.18924 | -0.21785 |
| C  | -1.47794  | 1.18777  | 0.21801  |
| C  | -1.47751  | -1.18832 | -0.21705 |
| H  | -0.95865  | 2.11377  | 0.43672  |
| H  | -0.95783  | -2.11415 | -0.43558 |
| C  | -0.73187  | -0.00014 | 0.00042  |
| C  | 0.72850   | -0.00005 | 0.00045  |
| H  | 0.95459   | -2.10037 | 0.49819  |
| H  | 0.95484   | 2.10017  | -0.49774 |

|    |          |          |          |
|----|----------|----------|----------|
| C  | 1.47425  | -1.18130 | 0.25273  |
| C  | 1.47436  | 1.18108  | -0.25214 |
| C  | 2.85773  | -1.18206 | 0.25328  |
| C  | 2.85784  | 1.18166  | -0.25299 |
| H  | 3.37337  | -2.10273 | 0.49874  |
| H  | 3.37352  | 2.10221  | -0.49876 |
| C  | 3.60782  | -0.00025 | 0.00012  |
| C  | 5.06137  | -0.00052 | -0.00016 |
| H  | 5.29421  | -2.15035 | -0.24981 |
| H  | 5.29559  | 2.14918  | 0.24964  |
| C  | 5.81326  | -1.20749 | -0.12068 |
| C  | 5.81400  | 1.20601  | 0.12022  |
| C  | 7.18926  | -1.21001 | -0.12719 |
| C  | 7.19001  | 1.20773  | 0.12627  |
| H  | 7.71414  | -2.15193 | -0.24182 |
| H  | 7.71548  | 2.14933  | 0.24078  |
| C  | 7.97082  | -0.00136 | -0.00062 |
| C  | 9.39540  | -0.00175 | -0.00087 |
| Al | 10.48652 | -1.62223 | -0.23053 |
| Al | 10.48744 | 1.61815  | 0.22837  |
| Al | 12.98531 | -1.62223 | -0.23053 |
| Al | 12.98623 | 1.61815  | 0.22837  |

60

#5 Phenyl ring (pX2-2)

|    |           |          |          |
|----|-----------|----------|----------|
| Al | -15.19987 | -1.63020 | -0.00006 |
| Al | -15.19906 | 1.63999  | -0.00042 |
| Al | -12.70108 | -1.63020 | -0.00006 |
| Al | -12.70027 | 1.63999  | -0.00042 |
| C  | -11.60884 | 0.00465  | -0.00016 |
| C  | -10.18262 | 0.00433  | -0.00006 |
| H  | -9.92437  | -2.15864 | 0.00016  |
| H  | -9.92369  | 2.16723  | -0.00022 |
| C  | -9.40105  | -1.20888 | 0.00010  |
| C  | -9.40066  | 1.21730  | -0.00011 |
| C  | -8.02427  | -1.20600 | 0.00017  |
| C  | -8.02388  | 1.21398  | -0.00003 |
| H  | -7.51585  | -2.16236 | 0.00029  |
| H  | -7.51512  | 2.17016  | -0.00008 |
| C  | -7.26763  | 0.00387  | 0.00011  |
| C  | -5.80828  | 0.00376  | 0.00017  |
| H  | -5.55569  | 2.16559  | 0.00012  |
| H  | -5.55562  | -2.15809 | 0.00025  |
| C  | -5.05235  | 1.20714  | 0.00016  |
| C  | -5.05234  | -1.19962 | 0.00024  |
| C  | -3.66777  | 1.20593  | 0.00020  |
| C  | -3.66776  | -1.19839 | 0.00028  |
| H  | -3.16357  | 2.16422  | 0.00019  |
| H  | -3.16355  | -2.15667 | 0.00032  |
| C  | -2.91525  | 0.00377  | 0.00026  |
| C  | -1.44513  | 0.00378  | 0.00028  |



|    |          |          |          |
|----|----------|----------|----------|
| H  | -1.19657 | -2.15620 | 0.00034  |
| H  | -1.19656 | 2.16375  | 0.00022  |
| C  | -0.69314 | -1.19751 | 0.00032  |
| C  | -0.69313 | 1.20506  | 0.00025  |
| C  | 0.69313  | -1.19751 | 0.00032  |
| C  | 0.69314  | 1.20506  | 0.00025  |
| H  | 1.19656  | -2.15621 | 0.00035  |
| H  | 1.19658  | 2.16375  | 0.00023  |
| C  | 1.44513  | 0.00377  | 0.00028  |
| C  | 2.91525  | 0.00375  | 0.00026  |
| H  | 3.16353  | -2.15669 | 0.00034  |
| H  | 3.16359  | 2.16420  | 0.00019  |
| C  | 3.66775  | -1.19841 | 0.00029  |
| C  | 3.66778  | 1.20591  | 0.00020  |
| C  | 5.05233  | -1.19965 | 0.00025  |
| C  | 5.05236  | 1.20711  | 0.00016  |
| H  | 5.55561  | -2.15812 | 0.00026  |
| H  | 5.55571  | 2.16555  | 0.00012  |
| C  | 5.80828  | 0.00372  | 0.00018  |
| C  | 7.26763  | 0.00382  | 0.00012  |
| H  | 7.51514  | 2.17011  | -0.00006 |
| H  | 7.51584  | -2.16241 | 0.00028  |
| C  | 8.02389  | 1.21393  | -0.00001 |
| C  | 8.02426  | -1.20606 | 0.00017  |
| C  | 9.40067  | 1.21724  | -0.00010 |
| C  | 9.40104  | -1.20895 | 0.00009  |
| H  | 9.92371  | 2.16716  | -0.00020 |
| H  | 9.92435  | -2.15871 | 0.00014  |
| C  | 10.18262 | 0.00427  | -0.00006 |
| C  | 11.60884 | 0.00457  | -0.00016 |
| Al | 12.70027 | 1.63991  | -0.00042 |
| Al | 12.70107 | -1.63029 | -0.00007 |
| Al | 15.19906 | 1.63991  | -0.00042 |
| Al | 15.19986 | -1.63029 | -0.00007 |

### **pX2 Electrodes (4-layer)**

28

#1 Phenyl ring (pX2-4)

|    |           |         |          |
|----|-----------|---------|----------|
| Al | -11.45954 | 0.00000 | -1.64947 |
| Al | -11.45954 | 0.00000 | 1.64947  |
| Al | -8.96075  | 0.00000 | -1.64947 |
| Al | -8.96075  | 0.00000 | 1.64947  |
| Al | -6.46196  | 0.00000 | -1.64947 |
| Al | -6.46196  | 0.00000 | 1.64947  |
| Al | -3.96317  | 0.00000 | 1.64947  |
| Al | -3.96316  | 0.00000 | -1.64947 |
| C  | -2.87419  | 0.00000 | 0.00000  |
| C  | -1.47494  | 0.00000 | 0.00000  |
| H  | -1.21004  | 0.00000 | -2.17465 |
| H  | -1.21004  | 0.00000 | 2.17465  |

|    |          |         |          |
|----|----------|---------|----------|
| C  | -0.67957 | 0.00000 | -1.22857 |
| C  | -0.67957 | 0.00000 | 1.22857  |
| C  | 0.67957  | 0.00000 | -1.22857 |
| C  | 0.67957  | 0.00000 | 1.22857  |
| H  | 1.21004  | 0.00000 | -2.17465 |
| H  | 1.21004  | 0.00000 | 2.17465  |
| C  | 1.47494  | 0.00000 | 0.00000  |
| C  | 2.87419  | 0.00000 | 0.00000  |
| Al | 3.96316  | 0.00000 | -1.64947 |
| Al | 3.96317  | 0.00000 | 1.64947  |
| Al | 6.46195  | 0.00000 | 1.64947  |
| Al | 6.46195  | 0.00000 | -1.64947 |
| Al | 8.96074  | 0.00000 | 1.64947  |
| Al | 8.96074  | 0.00000 | -1.64947 |
| Al | 11.45953 | 0.00000 | 1.64947  |
| Al | 11.45953 | 0.00000 | -1.64947 |

38

#2 Phenyl ring (pX2-4)

|    |           |          |          |
|----|-----------|----------|----------|
| Al | -13.63465 | 1.64181  | -0.00002 |
| Al | -13.63465 | -1.64257 | -0.00001 |
| Al | -11.13586 | 1.64181  | -0.00002 |
| Al | -11.13586 | -1.64257 | -0.00001 |
| Al | -8.63707  | 1.64181  | -0.00002 |
| Al | -8.63707  | -1.64257 | -0.00001 |
| Al | -6.13828  | 1.64181  | -0.00002 |
| Al | -6.13773  | -1.64257 | -0.00001 |
| C  | -5.04888  | -0.00020 | -0.00001 |
| C  | -3.63988  | 0.00004  | -0.00001 |
| H  | -3.37407  | 2.16898  | -0.00001 |
| H  | -3.37335  | -2.16882 | -0.00001 |
| C  | -2.84825  | 1.22073  | -0.00001 |
| C  | -2.84785  | -1.22039 | -0.00001 |
| C  | -1.48228  | 1.21990  | -0.00001 |
| C  | -1.48188  | -1.21911 | -0.00001 |
| H  | -0.97349  | 2.17549  | -0.00001 |
| H  | -0.97270  | -2.17451 | -0.00001 |
| C  | -0.71034  | 0.00051  | -0.00001 |
| C  | 0.71034   | 0.00051  | -0.00001 |
| H  | 0.97270   | -2.17451 | -0.00001 |
| H  | 0.97349   | 2.17549  | -0.00001 |
| C  | 1.48188   | -1.21911 | -0.00001 |
| C  | 1.48228   | 1.21990  | -0.00001 |
| C  | 2.84785   | -1.22039 | -0.00001 |
| C  | 2.84825   | 1.22073  | -0.00001 |
| H  | 3.37335   | -2.16882 | -0.00001 |
| H  | 3.37407   | 2.16898  | -0.00001 |
| C  | 3.63988   | 0.00004  | -0.00001 |
| C  | 5.04888   | -0.00020 | -0.00001 |
| Al | 6.13773   | -1.64257 | -0.00002 |
| Al | 6.13828   | 1.64181  | -0.00002 |

|    |          |          |          |
|----|----------|----------|----------|
| Al | 8.63707  | 1.64181  | -0.00002 |
| Al | 8.63707  | -1.64257 | -0.00002 |
| Al | 11.13586 | 1.64181  | -0.00002 |
| Al | 11.13586 | -1.64257 | -0.00002 |
| Al | 13.63465 | 1.64181  | -0.00002 |
| Al | 13.63465 | -1.64257 | -0.00002 |

48

#3 Phenyl ring (pX2-4)

|    |           |          |          |
|----|-----------|----------|----------|
| Al | -15.81606 | -1.63744 | 0.00000  |
| Al | -15.81606 | 1.63933  | 0.00000  |
| Al | -13.31727 | -1.63744 | 0.00000  |
| Al | -13.31727 | 1.63933  | 0.00000  |
| Al | -10.81848 | -1.63744 | 0.00000  |
| Al | -10.81848 | 1.63933  | 0.00000  |
| Al | -8.31969  | -1.63744 | 0.00000  |
| Al | -8.31872  | 1.63933  | 0.00000  |
| C  | -7.22932  | 0.00062  | -0.00001 |
| C  | -5.81323  | 0.00020  | -0.00001 |
| H  | -5.55049  | -2.16609 | -0.00001 |
| H  | -5.54920  | 2.16633  | -0.00001 |
| C  | -5.02567  | -1.21725 | -0.00001 |
| C  | -5.02495  | 1.21718  | -0.00001 |
| C  | -3.65516  | -1.21548 | -0.00002 |
| C  | -3.65443  | 1.21459  | -0.00002 |
| H  | -3.14684  | -2.17170 | -0.00002 |
| H  | -3.14548  | 2.17049  | -0.00002 |
| C  | -2.88999  | -0.00066 | -0.00002 |
| C  | -1.45290  | -0.00088 | -0.00002 |
| H  | -1.19245  | 2.16667  | -0.00002 |
| H  | -1.19240  | -2.16848 | -0.00002 |
| C  | -0.68741  | 1.20938  | -0.00002 |
| C  | -0.68741  | -1.21118 | -0.00002 |
| C  | 0.68741   | 1.20938  | -0.00002 |
| C  | 0.68741   | -1.21118 | -0.00002 |
| H  | 1.19239   | -2.16848 | -0.00002 |
| H  | 1.19245   | 2.16667  | -0.00002 |
| C  | 1.45290   | -0.00088 | -0.00002 |
| C  | 2.88999   | -0.00067 | -0.00002 |
| H  | 3.14548   | 2.17048  | -0.00002 |
| H  | 3.14684   | -2.17170 | -0.00001 |
| C  | 3.65443   | 1.21459  | -0.00002 |
| C  | 3.65516   | -1.21548 | -0.00001 |
| C  | 5.02495   | 1.21718  | -0.00002 |
| C  | 5.02567   | -1.21725 | -0.00001 |
| H  | 5.54920   | 2.16633  | -0.00001 |
| H  | 5.55049   | -2.16609 | -0.00001 |
| C  | 5.81323   | 0.00020  | -0.00001 |
| C  | 7.22932   | 0.00062  | -0.00001 |
| Al | 8.31872   | 1.63933  | 0.00000  |
| Al | 8.31969   | -1.63744 | 0.00001  |

|    |          |          |         |
|----|----------|----------|---------|
| Al | 10.81751 | -1.63744 | 0.00001 |
| Al | 10.81751 | 1.63933  | 0.00000 |
| Al | 13.31630 | -1.63744 | 0.00001 |
| Al | 13.31630 | 1.63933  | 0.00000 |
| Al | 15.81509 | -1.63744 | 0.00001 |
| Al | 15.81509 | 1.63933  | 0.00000 |

58

#4 Phenyl ring (pX2-4)

|    |          |          |         |
|----|----------|----------|---------|
| Al | 18.02578 | -1.71596 | 0.00000 |
| Al | 18.02192 | 1.72723  | 0.00000 |
| Al | 15.52699 | -1.71596 | 0.00000 |
| Al | 15.52313 | 1.72723  | 0.00000 |
| Al | 13.02820 | -1.71596 | 0.00000 |
| Al | 13.02434 | 1.72723  | 0.00000 |
| Al | 10.52941 | -1.71596 | 0.00000 |
| Al | 10.52555 | 1.72723  | 0.00000 |
| C  | 9.44798  | 0.00443  | 0.00000 |
| C  | 8.02552  | 0.00279  | 0.00000 |
| H  | 7.75423  | -2.16464 | 0.00000 |
| H  | 7.74909  | 2.16962  | 0.00000 |
| C  | 7.23355  | -1.21015 | 0.00000 |
| C  | 7.23071  | 1.21388  | 0.00000 |
| C  | 5.85925  | -1.21138 | 0.00000 |
| C  | 5.85642  | 1.21184  | 0.00000 |
| H  | 5.35126  | -2.16802 | 0.00000 |
| H  | 5.34618  | 2.16727  | 0.00000 |
| C  | 5.09792  | -0.00066 | 0.00000 |
| C  | 3.64661  | -0.00233 | 0.00000 |
| H  | 3.39243  | -2.16636 | 0.00000 |
| H  | 3.38754  | 2.16112  | 0.00000 |
| C  | 2.88814  | -1.20834 | 0.00000 |
| C  | 2.88541  | 1.20196  | 0.00000 |
| C  | 1.50676  | -1.20899 | 0.00000 |
| C  | 1.50404  | 1.19945  | 0.00000 |
| H  | 1.00365  | -2.16782 | 0.00000 |
| H  | 0.99876  | 2.15713  | 0.00000 |
| C  | 0.74822  | -0.00563 | 0.00000 |
| C  | -0.71062 | -0.00733 | 0.00000 |
| H  | -0.96104 | -2.17010 | 0.00000 |
| H  | -0.96618 | 2.15485  | 0.00000 |
| C  | -1.46638 | -1.21244 | 0.00000 |
| C  | -1.46923 | 1.19599  | 0.00000 |
| C  | -2.84776 | -1.21503 | 0.00000 |
| C  | -2.85061 | 1.19526  | 0.00000 |
| H  | -3.34979 | -2.17423 | 0.00000 |
| H  | -3.35495 | 2.15325  | 0.00000 |
| C  | -3.60904 | -0.01078 | 0.00000 |
| C  | -5.06037 | -0.01246 | 0.00000 |
| H  | -5.30877 | -2.18039 | 0.00000 |
| H  | -5.31360 | 2.15489  | 0.00000 |

|    |           |          |         |
|----|-----------|----------|---------|
| C  | -5.81894  | -1.22492 | 0.00000 |
| C  | -5.82166  | 1.19829  | 0.00000 |
| C  | -7.19323  | -1.22687 | 0.00000 |
| C  | -7.19595  | 1.19716  | 0.00000 |
| H  | -7.71170  | -2.18257 | 0.00000 |
| H  | -7.71659  | 2.15167  | 0.00000 |
| C  | -7.98797  | -0.01574 | 0.00000 |
| C  | -9.41045  | -0.01735 | 0.00000 |
| Al | -10.49191 | 1.70260  | 0.00000 |
| Al | -10.48827 | -1.73974 | 0.00000 |
| Al | -12.99070 | 1.70260  | 0.00000 |
| Al | -12.98710 | -1.73974 | 0.00000 |
| Al | -15.48950 | 1.70260  | 0.00000 |
| Al | -15.48590 | -1.73974 | 0.00000 |
| Al | -17.98830 | 1.70260  | 0.00000 |
| Al | -17.98460 | -1.73974 | 0.00000 |

68

#5 Phenyl ring (pX2-4)

|    |           |          |          |
|----|-----------|----------|----------|
| Al | -20.19745 | -1.63020 | -0.00006 |
| Al | -20.19664 | 1.63999  | -0.00042 |
| Al | -17.69866 | -1.63020 | -0.00006 |
| Al | -17.69785 | 1.63999  | -0.00042 |
| Al | -15.19987 | -1.63020 | -0.00006 |
| Al | -15.19906 | 1.63999  | -0.00042 |
| Al | -12.70108 | -1.63020 | -0.00006 |
| Al | -12.70027 | 1.63999  | -0.00042 |
| C  | -11.60884 | 0.00465  | -0.00016 |
| C  | -10.18262 | 0.00433  | -0.00006 |
| H  | -9.92437  | -2.15864 | 0.00016  |
| H  | -9.92369  | 2.16723  | -0.00022 |
| C  | -9.40105  | -1.20888 | 0.00010  |
| C  | -9.40066  | 1.21730  | -0.00011 |
| C  | -8.02427  | -1.20600 | 0.00017  |
| C  | -8.02388  | 1.21398  | -0.00003 |
| H  | -7.51585  | -2.16236 | 0.00029  |
| H  | -7.51512  | 2.17016  | -0.00008 |
| C  | -7.26763  | 0.00387  | 0.00011  |
| C  | -5.80828  | 0.00376  | 0.00017  |
| H  | -5.55569  | 2.16559  | 0.00012  |
| H  | -5.55562  | -2.15809 | 0.00025  |
| C  | -5.05235  | 1.20714  | 0.00016  |
| C  | -5.05234  | -1.19962 | 0.00024  |
| C  | -3.66777  | 1.20593  | 0.00020  |
| C  | -3.66776  | -1.19839 | 0.00028  |
| H  | -3.16357  | 2.16422  | 0.00019  |
| H  | -3.16355  | -2.15667 | 0.00032  |
| C  | -2.91525  | 0.00377  | 0.00026  |
| C  | -1.44513  | 0.00378  | 0.00028  |
| H  | -1.19657  | -2.15620 | 0.00034  |
| H  | -1.19656  | 2.16375  | 0.00022  |

|    |          |          |          |
|----|----------|----------|----------|
| C  | -0.69314 | -1.19751 | 0.00032  |
| C  | -0.69313 | 1.20506  | 0.00025  |
| C  | 0.69313  | -1.19751 | 0.00032  |
| C  | 0.69314  | 1.20506  | 0.00025  |
| H  | 1.19656  | -2.15621 | 0.00035  |
| H  | 1.19658  | 2.16375  | 0.00023  |
| C  | 1.44513  | 0.00377  | 0.00028  |
| C  | 2.91525  | 0.00375  | 0.00026  |
| H  | 3.16353  | -2.15669 | 0.00034  |
| H  | 3.16359  | 2.16420  | 0.00019  |
| C  | 3.66775  | -1.19841 | 0.00029  |
| C  | 3.66778  | 1.20591  | 0.00020  |
| C  | 5.05233  | -1.19965 | 0.00025  |
| C  | 5.05236  | 1.20711  | 0.00016  |
| H  | 5.55561  | -2.15812 | 0.00026  |
| H  | 5.55571  | 2.16555  | 0.00012  |
| C  | 5.80828  | 0.00372  | 0.00018  |
| C  | 7.26763  | 0.00382  | 0.00012  |
| H  | 7.51514  | 2.17011  | -0.00006 |
| H  | 7.51584  | -2.16241 | 0.00028  |
| C  | 8.02389  | 1.21393  | -0.00001 |
| C  | 8.02426  | -1.20606 | 0.00017  |
| C  | 9.40067  | 1.21724  | -0.00010 |
| C  | 9.40104  | -1.20895 | 0.00009  |
| H  | 9.92371  | 2.16716  | -0.00020 |
| H  | 9.92435  | -2.15871 | 0.00014  |
| C  | 10.18262 | 0.00427  | -0.00006 |
| C  | 11.60884 | 0.00457  | -0.00016 |
| Al | 12.70027 | 1.63991  | -0.00042 |
| Al | 12.70107 | -1.63029 | -0.00007 |
| Al | 15.19906 | 1.63991  | -0.00042 |
| Al | 15.19986 | -1.63029 | -0.00007 |
| Al | 17.69785 | 1.63991  | -0.00042 |
| Al | 17.69865 | -1.63029 | -0.00007 |
| Al | 20.19664 | 1.63991  | -0.00042 |
| Al | 20.19744 | -1.63029 | -0.00007 |

### **pX2 Electrodes (6-layer)**

36

#1 Phenyl ring (pX2-6)

|    |           |         |          |
|----|-----------|---------|----------|
| Al | -16.45712 | 0.00000 | 1.64947  |
| Al | -16.45712 | 0.00000 | -1.64947 |
| Al | -13.95833 | 0.00000 | 1.64947  |
| Al | -13.95833 | 0.00000 | -1.64947 |
| Al | -11.45954 | 0.00000 | 1.64947  |
| Al | -11.45954 | 0.00000 | -1.64947 |
| Al | -8.96075  | 0.00000 | 1.64947  |
| Al | -8.96075  | 0.00000 | -1.64947 |
| Al | -6.46196  | 0.00000 | 1.64947  |
| Al | -6.46196  | 0.00000 | -1.64947 |

|    |          |         |          |
|----|----------|---------|----------|
| Al | -3.96317 | 0.00000 | 1.64947  |
| Al | -3.96316 | 0.00000 | -1.64947 |
| C  | -2.87419 | 0.00000 | 0.00000  |
| C  | -1.47494 | 0.00000 | 0.00000  |
| H  | -1.21004 | 0.00000 | 2.17465  |
| H  | -1.21004 | 0.00000 | -2.17465 |
| C  | -0.67957 | 0.00000 | 1.22857  |
| C  | -0.67957 | 0.00000 | -1.22857 |
| C  | 0.67957  | 0.00000 | 1.22857  |
| C  | 0.67957  | 0.00000 | -1.22857 |
| H  | 1.21004  | 0.00000 | 2.17465  |
| H  | 1.21004  | 0.00000 | -2.17465 |
| C  | 1.47494  | 0.00000 | 0.00000  |
| C  | 2.87419  | 0.00000 | 0.00000  |
| Al | 3.96316  | 0.00000 | -1.64947 |
| Al | 3.96317  | 0.00000 | 1.64947  |
| Al | 6.46195  | 0.00000 | -1.64947 |
| Al | 6.46195  | 0.00000 | 1.64947  |
| Al | 8.96074  | 0.00000 | -1.64947 |
| Al | 8.96074  | 0.00000 | 1.64947  |
| Al | 11.45953 | 0.00000 | -1.64947 |
| Al | 11.45953 | 0.00000 | 1.64947  |
| Al | 13.95832 | 0.00000 | -1.64947 |
| Al | 13.95832 | 0.00000 | 1.64947  |
| Al | 16.45711 | 0.00000 | -1.64947 |
| Al | 16.45711 | 0.00000 | 1.64947  |

46

#2 Phenyl ring (pX2-6)

|    |           |          |          |
|----|-----------|----------|----------|
| Al | -18.63223 | -1.64257 | -0.00001 |
| Al | -18.63223 | 1.64181  | -0.00002 |
| Al | -16.13344 | -1.64257 | -0.00001 |
| Al | -16.13344 | 1.64181  | -0.00002 |
| Al | -13.63465 | -1.64257 | -0.00001 |
| Al | -13.63465 | 1.64181  | -0.00002 |
| Al | -11.13586 | -1.64257 | -0.00001 |
| Al | -11.13586 | 1.64181  | -0.00002 |
| Al | -8.63707  | -1.64257 | -0.00001 |
| Al | -8.63707  | 1.64181  | -0.00002 |
| Al | -6.13828  | 1.64181  | -0.00002 |
| Al | -6.13773  | -1.64257 | -0.00001 |
| C  | -5.04888  | -0.00020 | -0.00001 |
| C  | -3.63988  | 0.00004  | -0.00001 |
| H  | -3.37407  | 2.16898  | -0.00001 |
| H  | -3.37335  | -2.16882 | -0.00001 |
| C  | -2.84825  | 1.22073  | -0.00001 |
| C  | -2.84785  | -1.22039 | -0.00001 |
| C  | -1.48228  | 1.21990  | -0.00001 |
| C  | -1.48188  | -1.21911 | -0.00001 |
| H  | -0.97349  | 2.17549  | -0.00001 |
| H  | -0.97270  | -2.17451 | -0.00001 |

|    |          |          |          |
|----|----------|----------|----------|
| C  | -0.71034 | 0.00051  | -0.00001 |
| C  | 0.71034  | 0.00051  | -0.00001 |
| H  | 0.97270  | -2.17451 | -0.00001 |
| H  | 0.97349  | 2.17549  | -0.00001 |
| C  | 1.48188  | -1.21911 | -0.00001 |
| C  | 1.48228  | 1.21990  | -0.00001 |
| C  | 2.84785  | -1.22039 | -0.00001 |
| C  | 2.84825  | 1.22073  | -0.00001 |
| H  | 3.37335  | -2.16882 | -0.00001 |
| H  | 3.37407  | 2.16898  | -0.00001 |
| C  | 3.63988  | 0.00004  | -0.00001 |
| C  | 5.04888  | -0.00020 | -0.00001 |
| Al | 6.13773  | -1.64257 | -0.00002 |
| Al | 6.13828  | 1.64181  | -0.00002 |
| Al | 8.63707  | -1.64257 | -0.00002 |
| Al | 8.63707  | 1.64181  | -0.00002 |
| Al | 11.13586 | -1.64257 | -0.00002 |
| Al | 11.13586 | 1.64181  | -0.00002 |
| Al | 13.63465 | -1.64257 | -0.00002 |
| Al | 13.63465 | 1.64181  | -0.00002 |
| Al | 16.13344 | -1.64257 | -0.00002 |
| Al | 16.13344 | 1.64181  | -0.00002 |
| Al | 18.63223 | -1.64257 | -0.00002 |
| Al | 18.63223 | 1.64181  | -0.00002 |

56

#3 Phenyl ring (pX2-6)

|    |           |          |          |
|----|-----------|----------|----------|
| Al | -20.81364 | 1.63933  | 0.00000  |
| Al | -20.81364 | -1.63744 | 0.00000  |
| Al | -18.31485 | 1.63933  | 0.00000  |
| Al | -18.31485 | -1.63744 | 0.00000  |
| Al | -15.81606 | 1.63933  | 0.00000  |
| Al | -15.81606 | -1.63744 | 0.00000  |
| Al | -13.31727 | 1.63933  | 0.00000  |
| Al | -13.31727 | -1.63744 | 0.00000  |
| Al | -10.81848 | 1.63933  | 0.00000  |
| Al | -10.81848 | -1.63744 | 0.00000  |
| Al | -8.31969  | -1.63744 | 0.00000  |
| Al | -8.31872  | 1.63933  | 0.00000  |
| C  | -7.22932  | 0.00062  | -0.00001 |
| C  | -5.81323  | 0.00020  | -0.00001 |
| H  | -5.55049  | -2.16609 | -0.00001 |
| H  | -5.54920  | 2.16633  | -0.00001 |
| C  | -5.02567  | -1.21725 | -0.00001 |
| C  | -5.02495  | 1.21718  | -0.00001 |
| C  | -3.65516  | -1.21548 | -0.00002 |
| C  | -3.65443  | 1.21459  | -0.00002 |
| H  | -3.14684  | -2.17170 | -0.00002 |
| H  | -3.14548  | 2.17049  | -0.00002 |
| C  | -2.88999  | -0.00066 | -0.00002 |
| C  | -1.45290  | -0.00088 | -0.00002 |



|    |          |          |          |
|----|----------|----------|----------|
| H  | -1.19245 | 2.16667  | -0.00002 |
| H  | -1.19240 | -2.16848 | -0.00002 |
| C  | -0.68741 | -1.21118 | -0.00002 |
| C  | -0.68741 | 1.20938  | -0.00002 |
| C  | 0.68741  | -1.21118 | -0.00002 |
| C  | 0.68741  | 1.20938  | -0.00002 |
| H  | 1.19239  | -2.16848 | -0.00002 |
| H  | 1.19245  | 2.16667  | -0.00002 |
| C  | 1.45290  | -0.00088 | -0.00002 |
| C  | 2.88999  | -0.00067 | -0.00002 |
| H  | 3.14548  | 2.17048  | -0.00002 |
| H  | 3.14684  | -2.17170 | -0.00001 |
| C  | 3.65443  | 1.21459  | -0.00002 |
| C  | 3.65516  | -1.21548 | -0.00001 |
| C  | 5.02495  | 1.21718  | -0.00002 |
| C  | 5.02567  | -1.21725 | -0.00001 |
| H  | 5.54920  | 2.16633  | -0.00001 |
| H  | 5.55049  | -2.16609 | -0.00001 |
| C  | 5.81323  | 0.00020  | -0.00001 |
| C  | 7.22932  | 0.00062  | -0.00001 |
| Al | 8.31872  | 1.63933  | 0.00000  |
| Al | 8.31969  | -1.63744 | 0.00001  |
| Al | 10.81751 | 1.63933  | 0.00000  |
| Al | 10.81751 | -1.63744 | 0.00001  |
| Al | 13.31630 | 1.63933  | 0.00000  |
| Al | 13.31630 | -1.63744 | 0.00001  |
| Al | 15.81509 | 1.63933  | 0.00000  |
| Al | 15.81509 | -1.63744 | 0.00001  |
| Al | 18.31388 | 1.63933  | 0.00000  |
| Al | 18.31388 | -1.63744 | 0.00001  |
| Al | 20.81267 | 1.63933  | 0.00000  |
| Al | 20.81267 | -1.63744 | 0.00001  |

66

#4 Phenyl ring (pX2-6)

|    |          |          |         |
|----|----------|----------|---------|
| Al | 23.02336 | -1.71596 | 0.00000 |
| Al | 23.01950 | 1.72723  | 0.00000 |
| Al | 20.52457 | -1.71596 | 0.00000 |
| Al | 20.52071 | 1.72723  | 0.00000 |
| Al | 18.02578 | -1.71596 | 0.00000 |
| Al | 18.02192 | 1.72723  | 0.00000 |
| Al | 15.52699 | -1.71596 | 0.00000 |
| Al | 15.52313 | 1.72723  | 0.00000 |
| Al | 13.02820 | -1.71596 | 0.00000 |
| Al | 13.02434 | 1.72723  | 0.00000 |
| Al | 10.52941 | -1.71596 | 0.00000 |
| Al | 10.52555 | 1.72723  | 0.00000 |
| C  | 9.44798  | 0.00443  | 0.00000 |
| C  | 8.02552  | 0.00279  | 0.00000 |
| H  | 7.75423  | -2.16464 | 0.00000 |
| H  | 7.74909  | 2.16962  | 0.00000 |

|    |           |          |         |
|----|-----------|----------|---------|
| C  | 7.23355   | -1.21015 | 0.00000 |
| C  | 7.23071   | 1.21388  | 0.00000 |
| C  | 5.85925   | -1.21138 | 0.00000 |
| C  | 5.85642   | 1.21184  | 0.00000 |
| H  | 5.35126   | -2.16802 | 0.00000 |
| H  | 5.34618   | 2.16727  | 0.00000 |
| C  | 5.09792   | -0.00066 | 0.00000 |
| C  | 3.64661   | -0.00233 | 0.00000 |
| H  | 3.39243   | -2.16636 | 0.00000 |
| H  | 3.38754   | 2.16112  | 0.00000 |
| C  | 2.88814   | -1.20834 | 0.00000 |
| C  | 2.88541   | 1.20196  | 0.00000 |
| C  | 1.50676   | -1.20899 | 0.00000 |
| C  | 1.50404   | 1.19945  | 0.00000 |
| H  | 1.00365   | -2.16782 | 0.00000 |
| H  | 0.99876   | 2.15713  | 0.00000 |
| C  | 0.74822   | -0.00563 | 0.00000 |
| C  | -0.71062  | -0.00733 | 0.00000 |
| H  | -0.96104  | -2.17010 | 0.00000 |
| H  | -0.96618  | 2.15485  | 0.00000 |
| C  | -1.46638  | -1.21244 | 0.00000 |
| C  | -1.46923  | 1.19599  | 0.00000 |
| C  | -2.84776  | -1.21503 | 0.00000 |
| C  | -2.85061  | 1.19526  | 0.00000 |
| H  | -3.34979  | -2.17423 | 0.00000 |
| H  | -3.35495  | 2.15325  | 0.00000 |
| C  | -3.60904  | -0.01078 | 0.00000 |
| C  | -5.06037  | -0.01246 | 0.00000 |
| H  | -5.30877  | -2.18039 | 0.00000 |
| H  | -5.31360  | 2.15489  | 0.00000 |
| C  | -5.81894  | -1.22492 | 0.00000 |
| C  | -5.82166  | 1.19829  | 0.00000 |
| C  | -7.19323  | -1.22687 | 0.00000 |
| C  | -7.19595  | 1.19716  | 0.00000 |
| H  | -7.71170  | -2.18257 | 0.00000 |
| H  | -7.71659  | 2.15167  | 0.00000 |
| C  | -7.98797  | -0.01574 | 0.00000 |
| C  | -9.41045  | -0.01735 | 0.00000 |
| Al | -10.49191 | 1.70260  | 0.00000 |
| Al | -10.48827 | -1.73974 | 0.00000 |
| Al | -12.99070 | 1.70260  | 0.00000 |
| Al | -12.98710 | -1.73974 | 0.00000 |
| Al | -15.48950 | 1.70260  | 0.00000 |
| Al | -15.48590 | -1.73974 | 0.00000 |
| Al | -17.98830 | 1.70260  | 0.00000 |
| Al | -17.98460 | -1.73974 | 0.00000 |
| Al | -20.48710 | 1.70260  | 0.00000 |
| Al | -20.48340 | -1.73974 | 0.00000 |
| Al | -22.98590 | 1.70260  | 0.00000 |

|    |           |          |         |
|----|-----------|----------|---------|
| Al | -22.98220 | -1.73974 | 0.00000 |
|----|-----------|----------|---------|

76

#5 Phenyl ring (pX2-6)

|    |           |          |          |
|----|-----------|----------|----------|
| Al | -25.19503 | -1.63020 | -0.00006 |
| Al | -25.19422 | 1.63999  | -0.00042 |
| Al | -22.69624 | -1.63020 | -0.00006 |
| Al | -22.69543 | 1.63999  | -0.00042 |
| Al | -20.19745 | -1.63020 | -0.00006 |
| Al | -20.19664 | 1.63999  | -0.00042 |
| Al | -17.69866 | -1.63020 | -0.00006 |
| Al | -17.69785 | 1.63999  | -0.00042 |
| Al | -15.19987 | -1.63020 | -0.00006 |
| Al | -15.19906 | 1.63999  | -0.00042 |
| Al | -12.70108 | -1.63020 | -0.00006 |
| Al | -12.70027 | 1.63999  | -0.00042 |
| C  | -11.60884 | 0.00465  | -0.00016 |
| C  | -10.18262 | 0.00433  | -0.00006 |
| H  | -9.92437  | -2.15864 | 0.00016  |
| H  | -9.92369  | 2.16723  | -0.00022 |
| C  | -9.40105  | -1.20888 | 0.00010  |
| C  | -9.40066  | 1.21730  | -0.00011 |
| C  | -8.02427  | -1.20600 | 0.00017  |
| C  | -8.02388  | 1.21398  | -0.00003 |
| H  | -7.51585  | -2.16236 | 0.00029  |
| H  | -7.51512  | 2.17016  | -0.00008 |
| C  | -7.26763  | 0.00387  | 0.00011  |
| C  | -5.80828  | 0.00376  | 0.00017  |
| H  | -5.55569  | 2.16559  | 0.00012  |
| H  | -5.55562  | -2.15809 | 0.00025  |
| C  | -5.05235  | 1.20714  | 0.00016  |
| C  | -5.05234  | -1.19962 | 0.00024  |
| C  | -3.66777  | 1.20593  | 0.00020  |
| C  | -3.66776  | -1.19839 | 0.00028  |
| H  | -3.16357  | 2.16422  | 0.00019  |
| H  | -3.16355  | -2.15667 | 0.00032  |
| C  | -2.91525  | 0.00377  | 0.00026  |
| C  | -1.44513  | 0.00378  | 0.00028  |
| H  | -1.19657  | -2.15620 | 0.00034  |
| H  | -1.19656  | 2.16375  | 0.00022  |
| C  | -0.69314  | -1.19751 | 0.00032  |
| C  | -0.69313  | 1.20506  | 0.00025  |
| C  | 0.69313   | -1.19751 | 0.00032  |
| C  | 0.69314   | 1.20506  | 0.00025  |
| H  | 1.19656   | -2.15621 | 0.00035  |
| H  | 1.19658   | 2.16375  | 0.00023  |
| C  | 1.44513   | 0.00377  | 0.00028  |
| C  | 2.91525   | 0.00375  | 0.00026  |
| H  | 3.16353   | -2.15669 | 0.00034  |
| H  | 3.16359   | 2.16420  | 0.00019  |
| C  | 3.66775   | -1.19841 | 0.00029  |

|    |          |          |          |
|----|----------|----------|----------|
| C  | 3.66778  | 1.20591  | 0.00020  |
| C  | 5.05233  | -1.19965 | 0.00025  |
| C  | 5.05236  | 1.20711  | 0.00016  |
| H  | 5.55561  | -2.15812 | 0.00026  |
| H  | 5.55571  | 2.16555  | 0.00012  |
| C  | 5.80828  | 0.00372  | 0.00018  |
| C  | 7.26763  | 0.00382  | 0.00012  |
| H  | 7.51514  | 2.17011  | -0.00006 |
| H  | 7.51584  | -2.16241 | 0.00028  |
| C  | 8.02389  | 1.21393  | -0.00001 |
| C  | 8.02426  | -1.20606 | 0.00017  |
| C  | 9.40067  | 1.21724  | -0.00010 |
| C  | 9.40104  | -1.20895 | 0.00009  |
| H  | 9.92371  | 2.16716  | -0.00020 |
| H  | 9.92435  | -2.15871 | 0.00014  |
| C  | 10.18262 | 0.00427  | -0.00006 |
| C  | 11.60884 | 0.00457  | -0.00016 |
| Al | 12.70027 | 1.63991  | -0.00042 |
| Al | 15.19906 | 1.63991  | -0.00042 |
| Al | 17.69785 | 1.63991  | -0.00042 |
| Al | 20.19664 | 1.63991  | -0.00042 |
| Al | 22.69543 | 1.63991  | -0.00042 |
| Al | 25.19422 | 1.63991  | -0.00042 |
| Al | 12.70107 | -1.63029 | -0.00007 |
| Al | 15.19986 | -1.63029 | -0.00007 |
| Al | 17.69865 | -1.63029 | -0.00007 |
| Al | 20.19744 | -1.63029 | -0.00007 |
| Al | 22.69623 | -1.63029 | -0.00007 |
| Al | 25.19502 | -1.63029 | -0.00007 |

### **pX2 Electrodes (Twisted)**

56

#5 Phenyl ring twisted (pX2)

|    |                |               |               |
|----|----------------|---------------|---------------|
| Al | -12.7010800000 | -1.6302000000 | -0.0000600000 |
| Al | -12.7002700000 | 1.6399900000  | -0.0004200000 |
| C  | -11.6088400000 | 0.0046500000  | -0.0001600000 |
| C  | -10.1826200000 | 0.0043300000  | -0.0000600000 |
| H  | -9.9243700000  | -2.1586400000 | 0.0001600000  |
| H  | -9.9236900000  | 2.1672300000  | -0.0002200000 |
| C  | -9.4010500000  | -1.2088800000 | 0.0001000000  |
| C  | -9.4006600000  | 1.2173000000  | -0.0001100000 |
| C  | -8.0242700000  | -1.2060000000 | 0.0001700000  |
| C  | -8.0238800000  | 1.2139800000  | -0.0000300000 |
| H  | -7.5158500000  | -2.1623600000 | 0.0002900000  |
| H  | -7.5151200000  | 2.1701600000  | -0.0000800000 |
| C  | -7.2676300000  | 0.0038700000  | 0.0001100000  |
| C  | -5.8082072974  | 0.0041386208  | 0.0147246038  |
| H  | -5.5662505078  | -1.9034350115 | -1.0051049181 |
| H  | -5.5449394469  | 1.9115565918  | 1.0294942241  |
| C  | -5.0582560311  | -1.0578629304 | -0.5591172876 |

|    |               |               |               |
|----|---------------|---------------|---------------|
| C  | -5.0463644132 | 1.0657411981  | 0.5734275454  |
| C  | -3.6737395425 | -1.0571360070 | -0.5724159864 |
| C  | -3.6618599914 | 1.0643152262  | 0.5589805887  |
| H  | -3.1742937121 | -1.9028016172 | -1.0284114057 |
| H  | -3.1529464512 | 1.9097282616  | 1.0048742670  |
| C  | -2.9153226064 | 0.0033956676  | -0.0142616312 |
| C  | -1.4451300000 | 0.0037800000  | 0.0002800000  |
| H  | -1.1965700000 | -2.1562000000 | 0.0003400000  |
| H  | -1.1965600000 | 2.1637500000  | 0.0002200000  |
| C  | -0.6931400000 | -1.1975100000 | 0.0003200000  |
| C  | -0.6931300000 | 1.2050600000  | 0.0002500000  |
| C  | 0.6931300000  | -1.1975100000 | 0.0003200000  |
| C  | 0.6931400000  | 1.2050600000  | 0.0002500000  |
| H  | 1.1965600000  | -2.1562100000 | 0.0003500000  |
| H  | 1.1965800000  | 2.1637500000  | 0.0002300000  |
| C  | 1.4451300000  | 0.0037700000  | 0.0002800000  |
| C  | 2.9153548282  | 0.0210125588  | 0.0023445570  |
| H  | 3.1460162830  | -1.6273819490 | 1.4018926263  |
| H  | 3.1812776577  | 1.6634949383  | -1.3979245761 |
| C  | 3.6580066053  | -0.9035641900 | 0.7802077134  |
| C  | 3.6776240330  | 0.9276101748  | -0.7777301139 |
| C  | 5.0424761001  | -0.9210568951 | 0.7789671972  |
| C  | 5.0621134067  | 0.9119758782  | -0.7805516180 |
| H  | 5.5379110747  | -1.6570678951 | 1.3992796129  |
| H  | 5.5732351838  | 1.6359323607  | -1.4023313203 |
| C  | 5.8081748274  | -0.0135849814 | -0.0019040785 |
| C  | 7.2676300000  | 0.0038200000  | 0.0001200000  |
| H  | 7.5151400000  | 2.1701100000  | -0.0000600000 |
| H  | 7.5158400000  | -2.1624100000 | 0.0002800000  |
| C  | 8.0238900000  | 1.2139300000  | -0.0000100000 |
| C  | 8.0242600000  | -1.2060600000 | 0.0001700000  |
| C  | 9.4006700000  | 1.2172400000  | -0.0001000000 |
| C  | 9.4010400000  | -1.2089500000 | 0.0000900000  |
| H  | 9.9237100000  | 2.1671600000  | -0.0002000000 |
| H  | 9.9243500000  | -2.1587100000 | 0.0001400000  |
| C  | 10.1826200000 | 0.0042700000  | -0.0000600000 |
| C  | 11.6088400000 | 0.0045700000  | -0.0001600000 |
| Al | 12.7002700000 | 1.6399100000  | -0.0004200000 |
| Al | 12.7010700000 | -1.6302900000 | -0.0000700000 |

60

#5 Phenyl ring twisted (pX2-2)

|    |                |               |               |
|----|----------------|---------------|---------------|
| Al | -15.1998700000 | -1.6302000000 | -0.0000600000 |
| Al | -15.1990600000 | 1.6399900000  | -0.0004200000 |
| Al | -12.7010800000 | -1.6302000000 | -0.0000600000 |
| Al | -12.7002700000 | 1.6399900000  | -0.0004200000 |
| C  | -11.6088400000 | 0.0046500000  | -0.0001600000 |
| C  | -10.1826200000 | 0.0043300000  | -0.0000600000 |
| H  | -9.9243700000  | -2.1586400000 | 0.0001600000  |
| H  | -9.9236900000  | 2.1672300000  | -0.0002200000 |
| C  | -9.4010500000  | -1.2088800000 | 0.0001000000  |

|    |               |               |               |
|----|---------------|---------------|---------------|
| C  | -9.4006600000 | 1.2173000000  | -0.0001100000 |
| C  | -8.0242700000 | -1.2060000000 | 0.0001700000  |
| C  | -8.0238800000 | 1.2139800000  | -0.0000300000 |
| H  | -7.5158500000 | -2.1623600000 | 0.0002900000  |
| H  | -7.5151200000 | 2.1701600000  | -0.0000800000 |
| C  | -7.2676300000 | 0.0038700000  | 0.0001100000  |
| C  | -5.8082072974 | 0.0041386208  | 0.0147246038  |
| H  | -5.5662505078 | -1.9034350115 | -1.0051049181 |
| H  | -5.5449394469 | 1.9115565918  | 1.0294942241  |
| C  | -5.0582560311 | -1.0578629304 | -0.5591172876 |
| C  | -5.0463644132 | 1.0657411981  | 0.5734275454  |
| C  | -3.6737395425 | -1.0571360070 | -0.5724159864 |
| C  | -3.6618599914 | 1.0643152262  | 0.5589805887  |
| H  | -3.1742937121 | -1.9028016172 | -1.0284114057 |
| H  | -3.1529464512 | 1.9097282616  | 1.0048742670  |
| C  | -2.9153226064 | 0.0033956676  | -0.0142616312 |
| C  | -1.4451300000 | 0.0037800000  | 0.0002800000  |
| H  | -1.1965700000 | -2.1562000000 | 0.0003400000  |
| H  | -1.1965600000 | 2.1637500000  | 0.0002200000  |
| C  | -0.6931400000 | -1.1975100000 | 0.0003200000  |
| C  | -0.6931300000 | 1.2050600000  | 0.0002500000  |
| C  | 0.6931300000  | -1.1975100000 | 0.0003200000  |
| C  | 0.6931400000  | 1.2050600000  | 0.0002500000  |
| H  | 1.1965600000  | -2.1562100000 | 0.0003500000  |
| H  | 1.1965800000  | 2.1637500000  | 0.0002300000  |
| C  | 1.4451300000  | 0.0037700000  | 0.0002800000  |
| C  | 2.9153548282  | 0.0210125588  | 0.0023445570  |
| H  | 3.1460162830  | -1.6273819490 | 1.4018926263  |
| H  | 3.1812776577  | 1.6634949383  | -1.3979245761 |
| C  | 3.6580066053  | -0.9035641900 | 0.7802077134  |
| C  | 3.6776240330  | 0.9276101748  | -0.7777301139 |
| C  | 5.0424761001  | -0.9210568951 | 0.7789671972  |
| C  | 5.0621134067  | 0.9119758782  | -0.7805516180 |
| H  | 5.5379110747  | -1.6570678951 | 1.3992796129  |
| H  | 5.5732351838  | 1.6359323607  | -1.4023313203 |
| C  | 5.8081748274  | -0.0135849814 | -0.0019040785 |
| C  | 7.2676300000  | 0.0038200000  | 0.0001200000  |
| H  | 7.5151400000  | 2.1701100000  | -0.0000600000 |
| H  | 7.5158400000  | -2.1624100000 | 0.0002800000  |
| C  | 8.0238900000  | 1.2139300000  | -0.0000100000 |
| C  | 8.0242600000  | -1.2060600000 | 0.0001700000  |
| C  | 9.4006700000  | 1.2172400000  | -0.0001000000 |
| C  | 9.4010400000  | -1.2089500000 | 0.0000900000  |
| H  | 9.9237100000  | 2.1671600000  | -0.0002000000 |
| H  | 9.9243500000  | -2.1587100000 | 0.0001400000  |
| C  | 10.1826200000 | 0.0042700000  | -0.0000600000 |
| C  | 11.6088400000 | 0.0045700000  | -0.0001600000 |
| Al | 12.7002700000 | 1.6399100000  | -0.0004200000 |
| Al | 12.7010700000 | -1.6302900000 | -0.0000700000 |
| Al | 15.1990600000 | 1.6399100000  | -0.0004200000 |
| Al | 15.1998600000 | -1.6302900000 | -0.0000700000 |

68

#5 Phenyl ring twisted (pX2-4)

|    |                |               |               |
|----|----------------|---------------|---------------|
| Al | -20.1974500000 | -1.6302000000 | -0.0000600000 |
| Al | -20.1966400000 | 1.6399900000  | -0.0004200000 |
| Al | -17.6986600000 | -1.6302000000 | -0.0000600000 |
| Al | -17.6978500000 | 1.6399900000  | -0.0004200000 |
| Al | -15.1998700000 | -1.6302000000 | -0.0000600000 |
| Al | -15.1990600000 | 1.6399900000  | -0.0004200000 |
| Al | -12.7010800000 | -1.6302000000 | -0.0000600000 |
| Al | -12.7002700000 | 1.6399900000  | -0.0004200000 |
| C  | -11.6088400000 | 0.0046500000  | -0.0001600000 |
| C  | -10.1826200000 | 0.0043300000  | -0.0000600000 |
| H  | -9.9243700000  | -2.1586400000 | 0.0001600000  |
| H  | -9.9236900000  | 2.1672300000  | -0.0002200000 |
| C  | -9.4010500000  | -1.2088800000 | 0.0001000000  |
| C  | -9.4006600000  | 1.2173000000  | -0.0001100000 |
| C  | -8.0242700000  | -1.2060000000 | 0.0001700000  |
| C  | -8.0238800000  | 1.2139800000  | -0.0000300000 |
| H  | -7.5158500000  | -2.1623600000 | 0.0002900000  |
| H  | -7.5151200000  | 2.1701600000  | -0.0000800000 |
| C  | -7.2676300000  | 0.0038700000  | 0.0001100000  |
| C  | -5.8082072974  | 0.0041386208  | 0.0147246038  |
| H  | -5.5662505078  | -1.9034350115 | -1.0051049181 |
| H  | -5.5449394469  | 1.9115565918  | 1.0294942241  |
| C  | -5.0582560311  | -1.0578629304 | -0.5591172876 |
| C  | -5.0463644132  | 1.0657411981  | 0.5734275454  |
| C  | -3.6737395425  | -1.0571360070 | -0.5724159864 |
| C  | -3.6618599914  | 1.0643152262  | 0.5589805887  |
| H  | -3.1742937121  | -1.9028016172 | -1.0284114057 |
| H  | -3.1529464512  | 1.9097282616  | 1.0048742670  |
| C  | -2.9153226064  | 0.0033956676  | -0.0142616312 |
| C  | -1.4451300000  | 0.0037800000  | 0.0002800000  |
| H  | -1.1965700000  | -2.1562000000 | 0.0003400000  |
| H  | -1.1965600000  | 2.1637500000  | 0.0002200000  |
| C  | -0.6931400000  | -1.1975100000 | 0.0003200000  |
| C  | -0.6931300000  | 1.2050600000  | 0.0002500000  |
| C  | 0.6931300000   | -1.1975100000 | 0.0003200000  |
| C  | 0.6931400000   | 1.2050600000  | 0.0002500000  |
| H  | 1.1965600000   | -2.1562100000 | 0.0003500000  |
| H  | 1.1965800000   | 2.1637500000  | 0.0002300000  |
| C  | 1.4451300000   | 0.0037700000  | 0.0002800000  |
| C  | 2.9153548282   | 0.0210125588  | 0.0023445570  |
| H  | 3.1460162830   | -1.6273819490 | 1.4018926263  |
| H  | 3.1812776577   | 1.6634949383  | -1.3979245761 |
| C  | 3.6580066053   | -0.9035641900 | 0.7802077134  |
| C  | 3.6776240330   | 0.9276101748  | -0.7777301139 |
| C  | 5.0424761001   | -0.9210568951 | 0.7789671972  |
| C  | 5.0621134067   | 0.9119758782  | -0.7805516180 |
| H  | 5.5379110747   | -1.6570678951 | 1.3992796129  |
| H  | 5.5732351838   | 1.6359323607  | -1.4023313203 |

|    |               |               |               |
|----|---------------|---------------|---------------|
| C  | 5.8081748274  | -0.0135849814 | -0.0019040785 |
| C  | 7.2676300000  | 0.0038200000  | 0.0001200000  |
| H  | 7.5151400000  | 2.1701100000  | -0.0000600000 |
| H  | 7.5158400000  | -2.1624100000 | 0.0002800000  |
| C  | 8.0238900000  | 1.2139300000  | -0.0000100000 |
| C  | 8.0242600000  | -1.2060600000 | 0.0001700000  |
| C  | 9.4006700000  | 1.2172400000  | -0.0001000000 |
| C  | 9.4010400000  | -1.2089500000 | 0.0000900000  |
| H  | 9.9237100000  | 2.1671600000  | -0.0002000000 |
| H  | 9.9243500000  | -2.1587100000 | 0.0001400000  |
| C  | 10.1826200000 | 0.0042700000  | -0.0000600000 |
| C  | 11.6088400000 | 0.0045700000  | -0.0001600000 |
| Al | 12.7002700000 | 1.6399100000  | -0.0004200000 |
| Al | 12.7010700000 | -1.6302900000 | -0.0000700000 |
| Al | 15.1990600000 | 1.6399100000  | -0.0004200000 |
| Al | 15.1998600000 | -1.6302900000 | -0.0000700000 |
| Al | 17.6978500000 | 1.6399100000  | -0.0004200000 |
| Al | 17.6986500000 | -1.6302900000 | -0.0000700000 |
| Al | 20.1966400000 | 1.6399100000  | -0.0004200000 |
| Al | 20.1974400000 | -1.6302900000 | -0.0000700000 |

76

#5 Phenyl ring twisted (pX2-6)

|    |                |               |               |
|----|----------------|---------------|---------------|
| Al | -25.1950300000 | -1.6302000000 | -0.0000600000 |
| Al | -25.1942200000 | 1.6399900000  | -0.0004200000 |
| Al | -22.6962400000 | -1.6302000000 | -0.0000600000 |
| Al | -22.6954300000 | 1.6399900000  | -0.0004200000 |
| Al | -20.1974500000 | -1.6302000000 | -0.0000600000 |
| Al | -20.1966400000 | 1.6399900000  | -0.0004200000 |
| Al | -17.6986600000 | -1.6302000000 | -0.0000600000 |
| Al | -17.6978500000 | 1.6399900000  | -0.0004200000 |
| Al | -15.1998700000 | -1.6302000000 | -0.0000600000 |
| Al | -15.1990600000 | 1.6399900000  | -0.0004200000 |
| Al | -12.7010800000 | -1.6302000000 | -0.0000600000 |
| Al | -12.7002700000 | 1.6399900000  | -0.0004200000 |
| C  | -11.6088400000 | 0.0046500000  | -0.0001600000 |
| C  | -10.1826200000 | 0.0043300000  | -0.0000600000 |
| H  | -9.9243700000  | -2.1586400000 | 0.0001600000  |
| H  | -9.9236900000  | 2.1672300000  | -0.0002200000 |
| C  | -9.4010500000  | -1.2088800000 | 0.0001000000  |
| C  | -9.4006600000  | 1.2173000000  | -0.0001100000 |
| C  | -8.0242700000  | -1.2060000000 | 0.0001700000  |
| C  | -8.0238800000  | 1.2139800000  | -0.0000300000 |
| H  | -7.5158500000  | -2.1623600000 | 0.0002900000  |
| H  | -7.5151200000  | 2.1701600000  | -0.0000800000 |
| C  | -7.2676300000  | 0.0038700000  | 0.0001100000  |
| C  | -5.8082072974  | 0.0041386208  | 0.0147246038  |
| H  | -5.5662505078  | -1.9034350115 | -1.0051049181 |
| H  | -5.5449394469  | 1.9115565918  | 1.0294942241  |
| C  | -5.0582560311  | -1.0578629304 | -0.5591172876 |
| C  | -5.0463644132  | 1.0657411981  | 0.5734275454  |



|    |               |               |               |
|----|---------------|---------------|---------------|
| C  | -3.6737395425 | -1.0571360070 | -0.5724159864 |
| C  | -3.6618599914 | 1.0643152262  | 0.5589805887  |
| H  | -3.1742937121 | -1.9028016172 | -1.0284114057 |
| H  | -3.1529464512 | 1.9097282616  | 1.0048742670  |
| C  | -2.9153226064 | 0.0033956676  | -0.0142616312 |
| C  | -1.4451300000 | 0.0037800000  | 0.0002800000  |
| H  | -1.1965700000 | -2.1562000000 | 0.0003400000  |
| H  | -1.1965600000 | 2.1637500000  | 0.0002200000  |
| C  | -0.6931400000 | -1.1975100000 | 0.0003200000  |
| C  | -0.6931300000 | 1.2050600000  | 0.0002500000  |
| C  | 0.6931300000  | -1.1975100000 | 0.0003200000  |
| C  | 0.6931400000  | 1.2050600000  | 0.0002500000  |
| H  | 1.1965600000  | -2.1562100000 | 0.0003500000  |
| H  | 1.1965800000  | 2.1637500000  | 0.0002300000  |
| C  | 1.4451300000  | 0.0037700000  | 0.0002800000  |
| C  | 2.9153548282  | 0.0210125588  | 0.0023445570  |
| H  | 3.1460162830  | -1.6273819490 | 1.4018926263  |
| H  | 3.1812776577  | 1.6634949383  | -1.3979245761 |
| C  | 3.6580066053  | -0.9035641900 | 0.7802077134  |
| C  | 3.6776240330  | 0.9276101748  | -0.7777301139 |
| C  | 5.0424761001  | -0.9210568951 | 0.7789671972  |
| C  | 5.0621134067  | 0.9119758782  | -0.7805516180 |
| H  | 5.5379110747  | -1.6570678951 | 1.3992796129  |
| H  | 5.5732351838  | 1.6359323607  | -1.4023313203 |
| C  | 5.8081748274  | -0.0135849814 | -0.0019040785 |
| C  | 7.2676300000  | 0.0038200000  | 0.0001200000  |
| H  | 7.5151400000  | 2.1701100000  | -0.0000600000 |
| H  | 7.5158400000  | -2.1624100000 | 0.0002800000  |
| C  | 8.0238900000  | 1.2139300000  | -0.0000100000 |
| C  | 8.0242600000  | -1.2060600000 | 0.0001700000  |
| C  | 9.4006700000  | 1.2172400000  | -0.0001000000 |
| C  | 9.4010400000  | -1.2089500000 | 0.0000900000  |
| H  | 9.9237100000  | 2.1671600000  | -0.0002000000 |
| H  | 9.9243500000  | -2.1587100000 | 0.0001400000  |
| C  | 10.1826200000 | 0.0042700000  | -0.0000600000 |
| C  | 11.6088400000 | 0.0045700000  | -0.0001600000 |
| Al | 12.7002700000 | 1.6399100000  | -0.0004200000 |
| Al | 12.7010700000 | -1.6302900000 | -0.0000700000 |
| Al | 15.1990600000 | 1.6399100000  | -0.0004200000 |
| Al | 15.1998600000 | -1.6302900000 | -0.0000700000 |
| Al | 17.6978500000 | 1.6399100000  | -0.0004200000 |
| Al | 17.6986500000 | -1.6302900000 | -0.0000700000 |
| Al | 20.1966400000 | 1.6399100000  | -0.0004200000 |
| Al | 20.1974400000 | -1.6302900000 | -0.0000700000 |
| Al | 22.6954300000 | 1.6399100000  | -0.0004200000 |
| Al | 22.6962300000 | -1.6302900000 | -0.0000700000 |
| Al | 25.1942200000 | 1.6399100000  | -0.0004200000 |
| Al | 25.1950200000 | -1.6302900000 | -0.0000700000 |

## Section S2. Active Space Orbitals for All Systems Studied

### pP 1-Ring

(12e, 12o) CAS

12

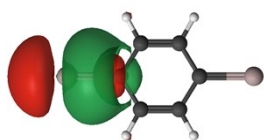

11

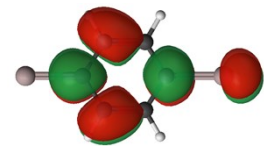

10

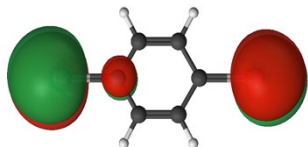

9

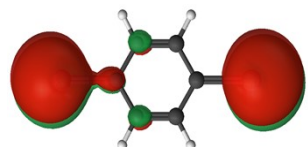

8

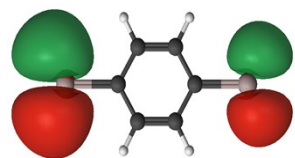

7

6

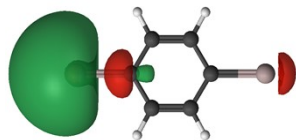

5

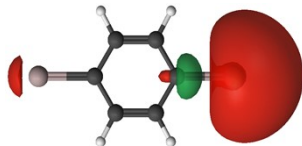

4

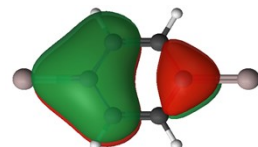

3

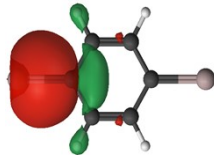

2

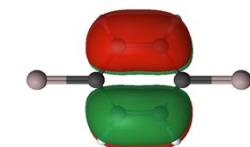

1

| Orb. | Occ. |
|------|------|
| 12   | 0.02 |
| 11   | 0.04 |
| 10   | 0.06 |
| 9    | 0.06 |
| 8    | 0.07 |
| 7    | 0.07 |
| 6    | 1.87 |
| 5    | 1.87 |
| 4    | 1.97 |
| 3    | 1.98 |
| 2    | 2.0  |
| 1    | 2.0  |

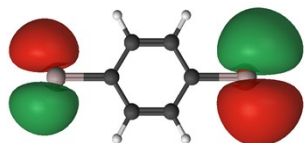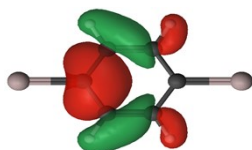

## pP 1-Ring

(8e, 8o) CAS

1-layer electrode

8

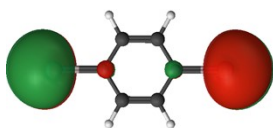

7

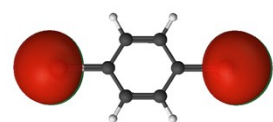

6

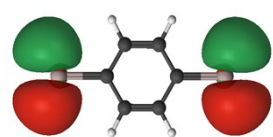

5

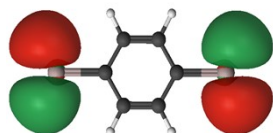

4

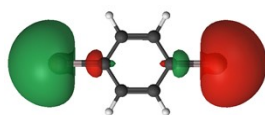

3

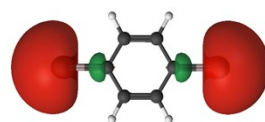

2

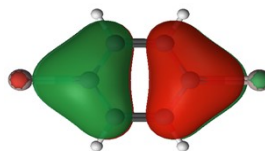

1

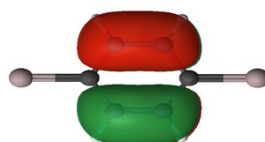

| Orb. | Occ. |
|------|------|
| 8    | 0.06 |
| 7    | 0.06 |
| 6    | 0.07 |
| 5    | 0.07 |
| 4    | 1.87 |
| 3    | 1.87 |

|   |     |
|---|-----|
| 2 | 2.0 |
| 1 | 2.0 |

## pP 1-Ring

(8e, 8o) CAS

2-layer electrode

8

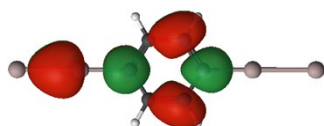

7

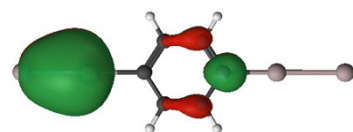

6

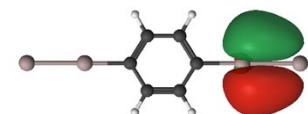

4

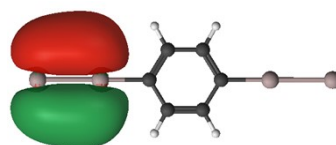

3

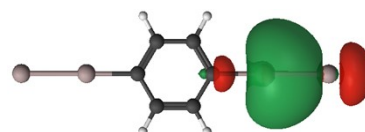

2

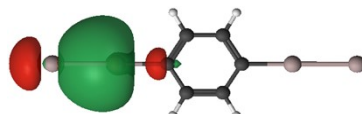

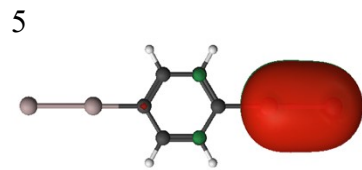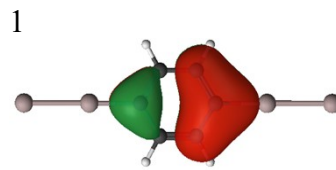

| Orb. | Occ. |
|------|------|
| 8    | 0.04 |
| 7    | 0.05 |
| 6    | 0.05 |
| 5    | 1.0  |
| 4    | 1.0  |
| 3    | 1.95 |
| 2    | 1.95 |
| 1    | 1.96 |

## pP 1-Ring

(8e, 8o) CAS

4-layer electrode

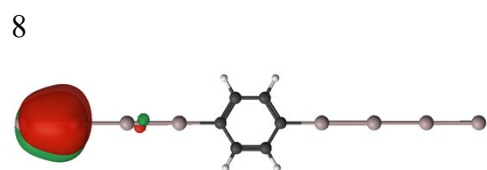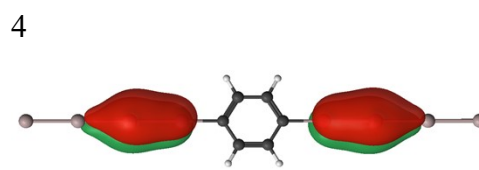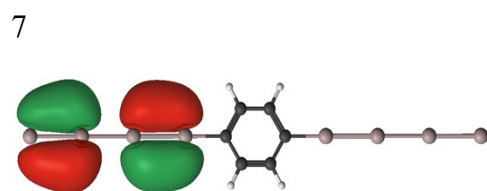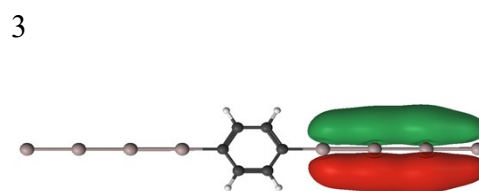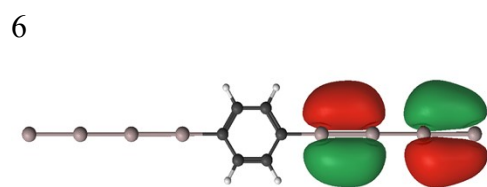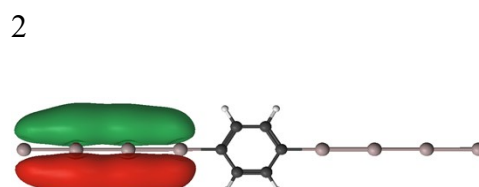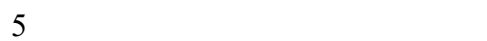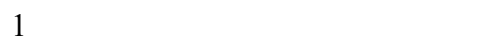

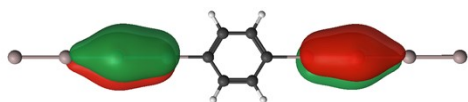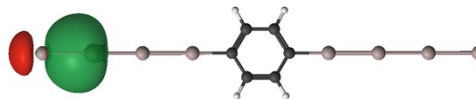

| Orb. | Occ. |
|------|------|
| 8    | 0.05 |
| 7    | 0.47 |
| 6    | 0.5  |
| 5    | 0.95 |
| 4    | 1.04 |
| 3    | 1.5  |
| 2    | 1.53 |
| 1    | 1.96 |

## pP 1-Ring

(8e, 8o) CAS

6-layer electrode

8

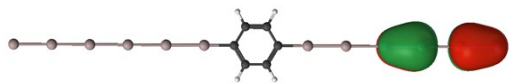

7

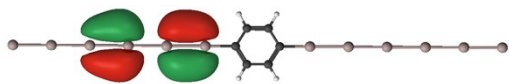

6

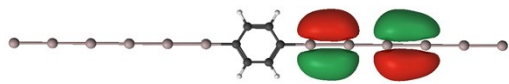

5

4

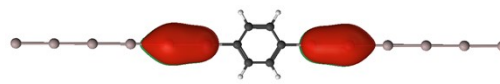

3

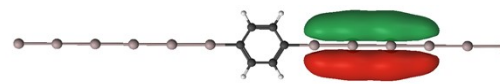

2

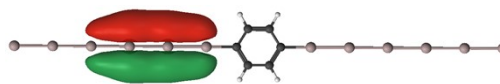

1

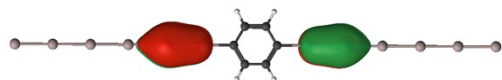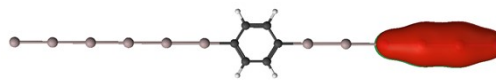

| Orb. | Occ. |
|------|------|
| 8    | 0.34 |
| 7    | 0.46 |
| 6    | 0.52 |
| 5    | 0.95 |
| 4    | 1.05 |
| 3    | 1.48 |
| 2    | 1.54 |
| 1    | 1.66 |

## pP 2-Ring (12e, 12o) CAS

12

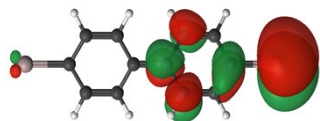

11

6

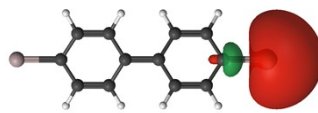

5

| Orb. | Occ. |
|------|------|
| 12   | 0.06 |
| 11   | 0.06 |
| 10   | 0.07 |

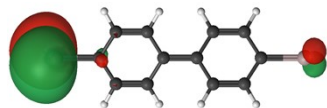

10

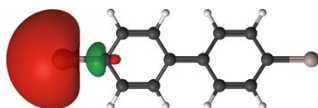

4

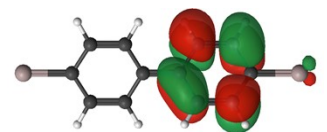

9

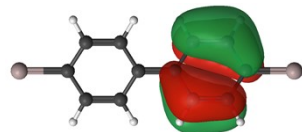

3

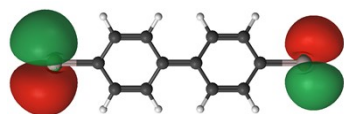

8

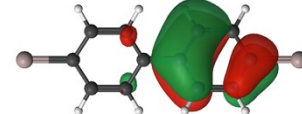

2

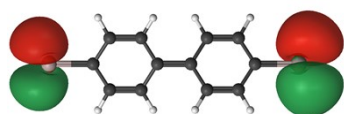

7

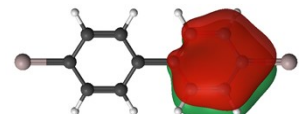

1

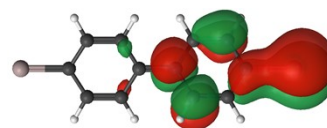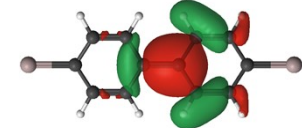

|   |      |
|---|------|
| 9 | 0.07 |
| 8 | 0.07 |
| 7 | 0.07 |
| 6 | 1.87 |
| 5 | 1.87 |
| 4 | 1.94 |
| 3 | 1.94 |
| 2 | 1.99 |
| 1 | 2.0  |

## pP 2-Ring

(8e, 8o) CAS

1-layer electrode

8

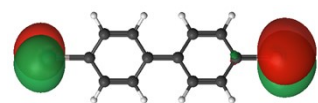

7

4

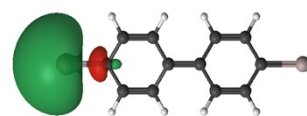

3



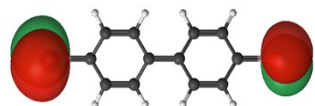

6

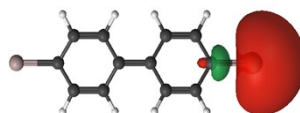

2

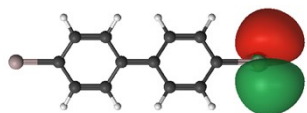

5

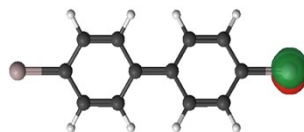

1

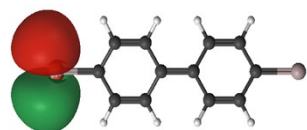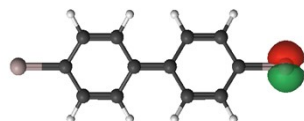

| Orb. | Occ. |
|------|------|
| 8    | 0.06 |
| 7    | 0.06 |
| 6    | 0.07 |
| 5    | 0.07 |
| 4    | 1.87 |
| 3    | 1.87 |
| 2    | 2.0  |
| 1    | 2.0  |

### pP 2-Ring

(8e, 8o) CAS

2-layer electrode

8

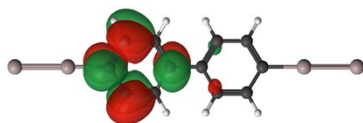

4

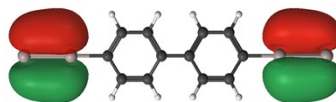

7

3

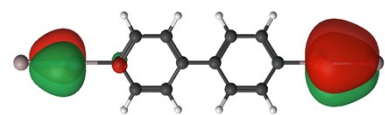

6

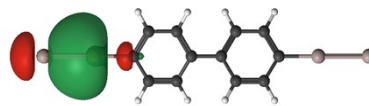

2

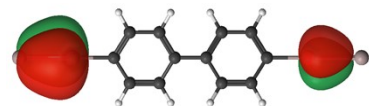

5

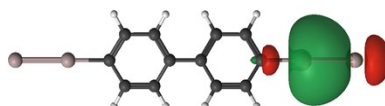

1

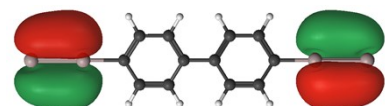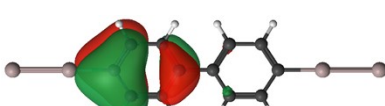

| Orb. | Occ. |
|------|------|
| 8    | 0.04 |
| 7    | 0.05 |
| 6    | 0.05 |
| 5    | 1.0  |
| 4    | 1.0  |
| 3    | 1.95 |
| 2    | 1.95 |
| 1    | 1.96 |

## pP 2-Ring

(8e, 8o) CAS

4-layer electrode

8

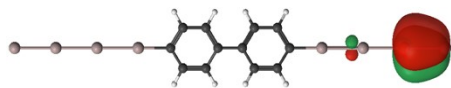

4

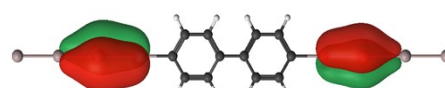

7

3

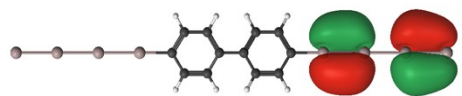

6

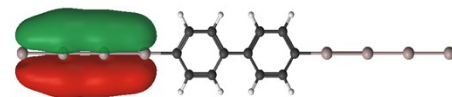

2

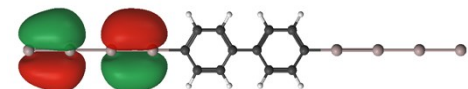

5

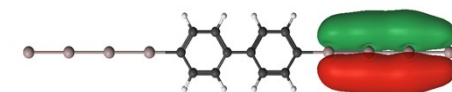

1

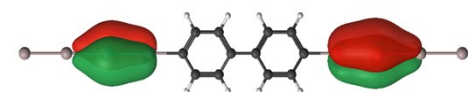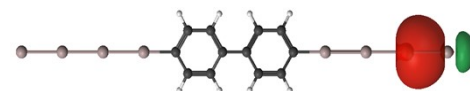

| Orb. | Occ. |
|------|------|
| 8    | 0.05 |
| 7    | 0.47 |
| 6    | 0.5  |
| 5    | 0.99 |
| 4    | 1.01 |
| 3    | 1.50 |
| 2    | 1.53 |
| 1    | 1.96 |

## **pP 2-Ring**

**(8e, 8o) CAS**

**6-layer electrode**

8

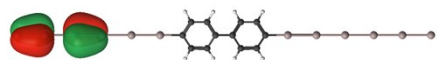

7

4

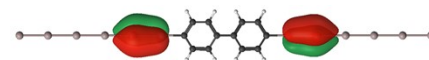

3

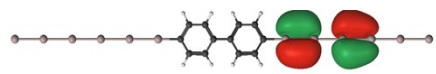

6

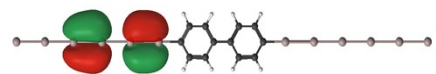

5

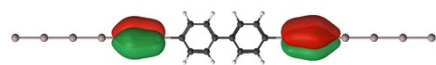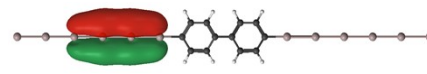

2

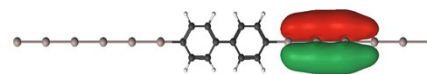

1

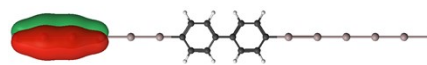

| Orb. | Occ. |
|------|------|
| 8    | 0.34 |
| 7    | 0.47 |
| 6    | 0.53 |
| 5    | 0.99 |
| 4    | 1.01 |
| 3    | 1.47 |
| 2    | 1.53 |
| 1    | 1.66 |

## **pP 3-Ring**

(12e, 12o) CAS

12

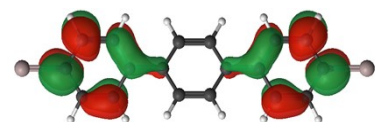

11

6

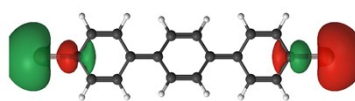

5

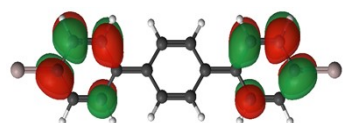

10

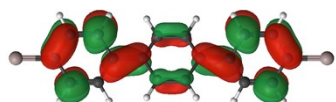

9

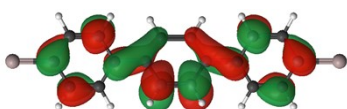

8

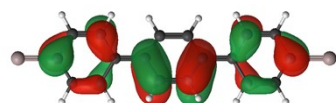

7

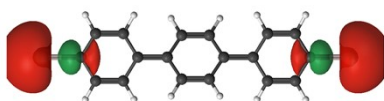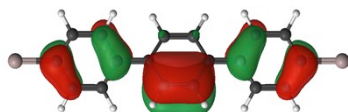

4

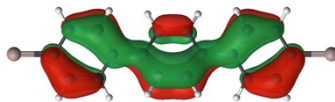

3

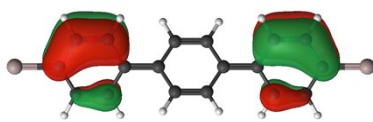

2

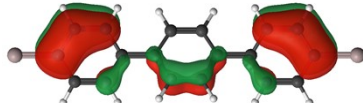

1

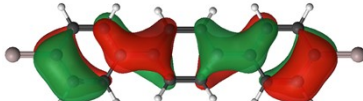

| Orb. | Occ. |
|------|------|
| 12   | 0.07 |
| 11   | 0.07 |
| 10   | 0.07 |
| 9    | 0.07 |
| 8    | 0.17 |
| 7    | 1.0  |
| 6    | 1.0  |
| 5    | 1.86 |
| 4    | 1.92 |
| 3    | 1.92 |
| 2    | 1.92 |
| 1    | 1.94 |

## pP 3-Ring

(8e, 8o) CAS

1-layer electrode

8

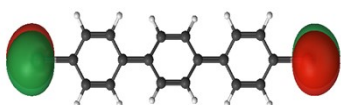

7

4

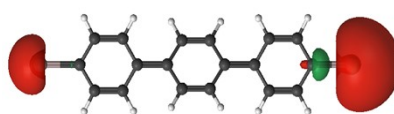

3

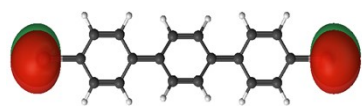

6

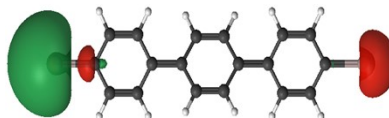

2

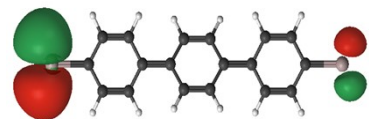

5

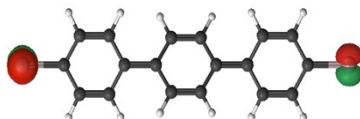

1

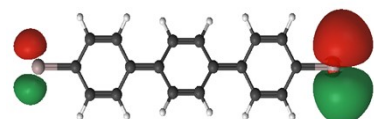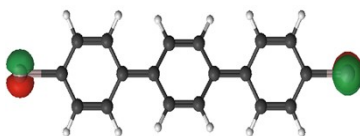

| Orb. | Occ. |
|------|------|
| 8    | 0.06 |
| 7    | 0.06 |
| 6    | 0.07 |
| 5    | 0.07 |
| 4    | 1.87 |
| 3    | 1.87 |
| 2    | 2.0  |
| 1    | 2.0  |

### pP 3-Ring

(8e, 8o) CAS

2-layer electrode

8

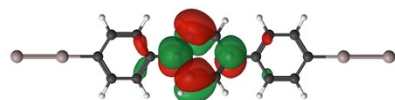

4

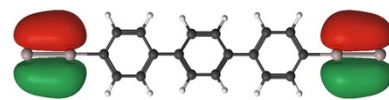

7

3

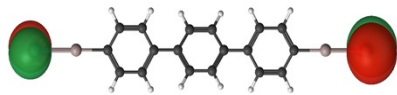

6

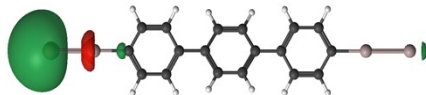

2

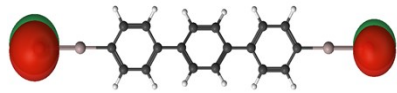

5

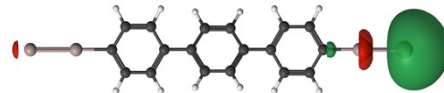

1

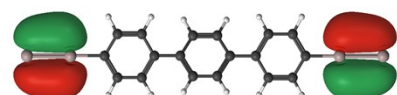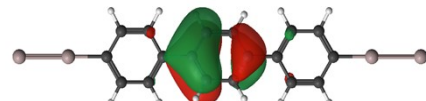

| Orb. | Occ. |
|------|------|
| 8    | 0.04 |
| 7    | 0.08 |
| 6    | 0.08 |
| 5    | 1.0  |
| 4    | 1.0  |
| 3    | 1.92 |
| 2    | 1.92 |
| 1    | 1.96 |

## **pP 3-Ring**

**(8e, 8o) CAS**

**4-layer electrode**

8

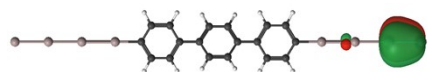

4

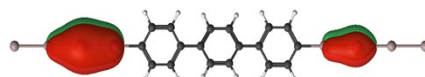

7

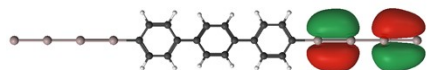

6

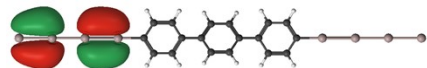

5

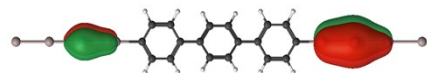

3

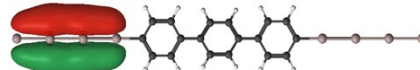

2

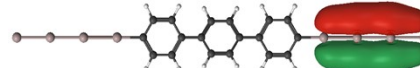

1

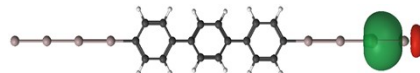

| Orb. | Occ. |
|------|------|
| 8    | 0.05 |
| 7    | 0.47 |
| 6    | 0.5  |
| 5    | 0.99 |
| 4    | 1.0  |
| 3    | 1.50 |
| 2    | 1.53 |
| 1    | 1.96 |

## **pP 3-Ring**

**(8e, 8o) CAS**

**6-layer electrode**

8

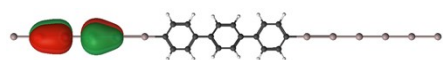

4

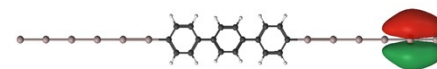



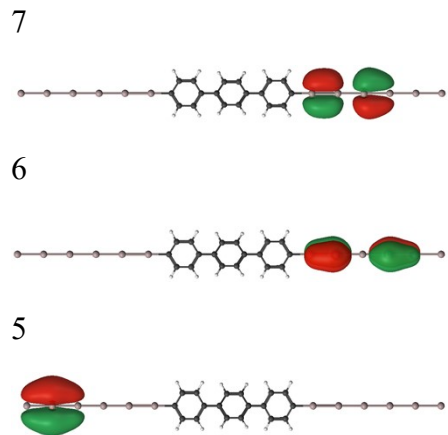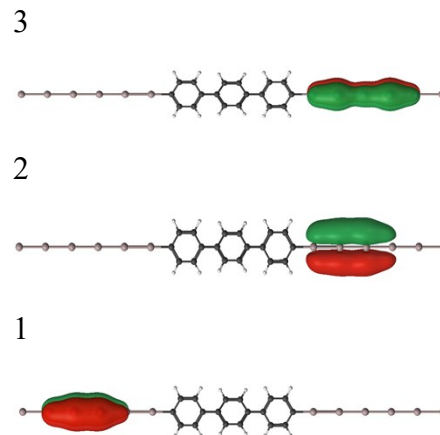

| Orb. | Occ. |
|------|------|
| 8    | 0.35 |
| 7    | 0.47 |
| 6    | 0.75 |
| 5    | 1.0  |
| 4    | 1.0  |
| 3    | 1.25 |
| 2    | 1.53 |
| 1    | 1.65 |

**pP 4-Ring**  
**(12e, 12o) CAS**

12

6

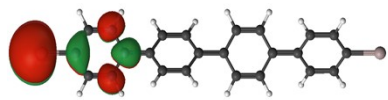

11

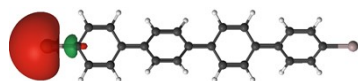

5

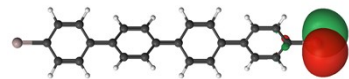

10

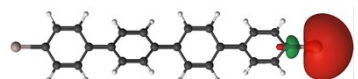

4

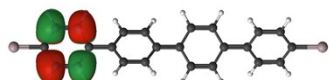

9

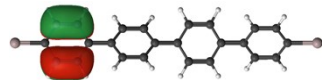

3

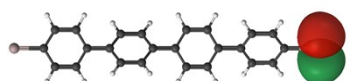

8

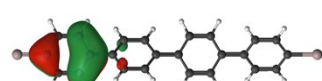

2

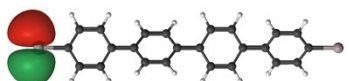

7

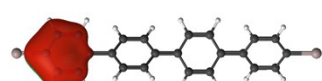

1

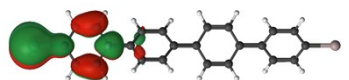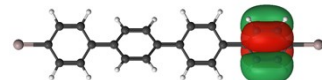

| Orb. | Occ. |
|------|------|
| 12   | 0.06 |
| 11   | 0.06 |
| 10   | 0.07 |
| 9    | 0.07 |
| 8    | 0.07 |
| 7    | 0.07 |
| 6    | 1.87 |
| 5    | 1.87 |
| 4    | 1.94 |
| 3    | 1.94 |
| 2    | 1.99 |
| 1    | 2.0  |

## pP 4-Ring

(8e, 8o) CAS

1-layer electrode

8

4

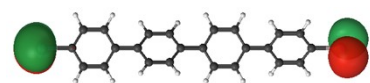

7

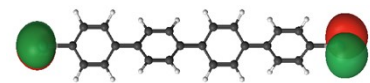

6

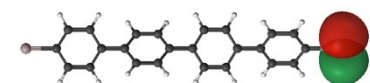

5

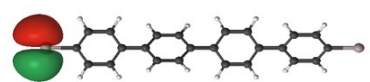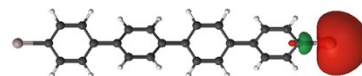

3

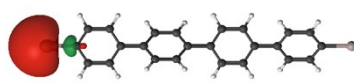

2

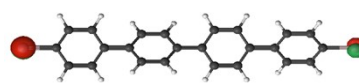

1

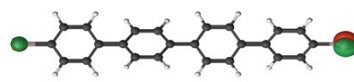

| Orb. | Occ. |
|------|------|
| 8    | 0.06 |
| 7    | 0.06 |
| 6    | 0.07 |
| 5    | 0.07 |
| 4    | 1.87 |
| 3    | 1.87 |
| 2    | 2.0  |
| 1    | 2.0  |

## **pP 4-Ring**

**(8e, 8o) CAS**

**2-layer electrode**

8

4

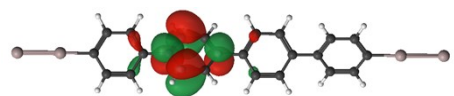

7

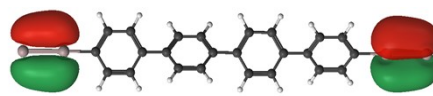

3

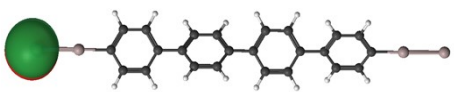

6

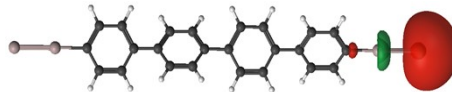

2

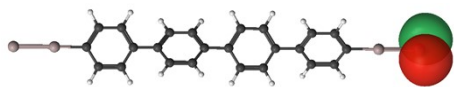

5

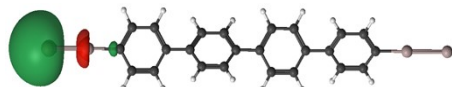

1

| Orb. | Occ. |
|------|------|
| 8    | 0.04 |
| 7    | 0.08 |
| 6    | 0.08 |
| 5    | 1.0  |
| 4    | 1.0  |
| 3    | 1.92 |
| 2    | 1.92 |
| 1    | 1.96 |

## **pP 4-Ring**

**(8e, 8o) CAS**

**4-layer electrode**

8

4

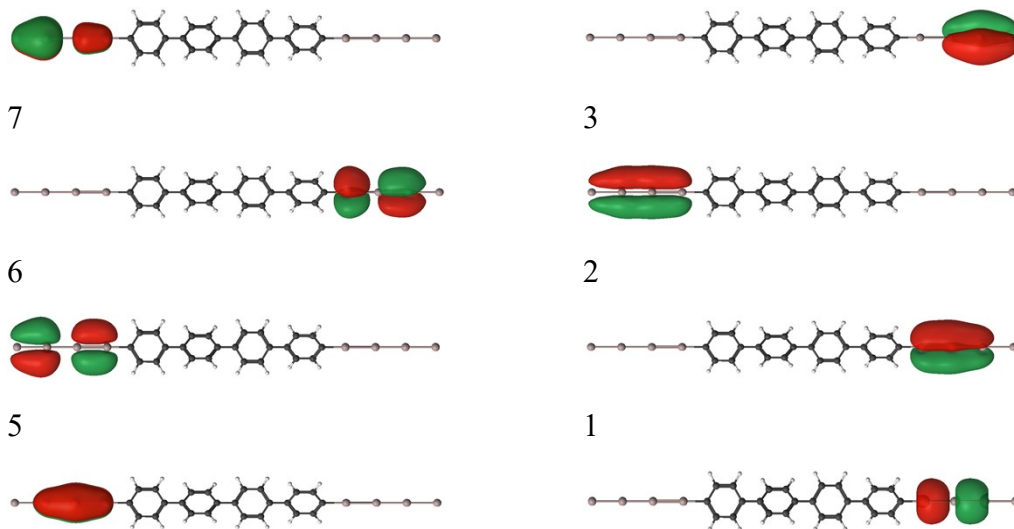

| Orb. | Occ. |
|------|------|
| 8    | 0.04 |
| 7    | 0.23 |
| 6    | 0.36 |
| 5    | 0.96 |
| 4    | 1.0  |
| 3    | 1.64 |
| 2    | 1.77 |
| 1    | 2.0  |

**pP 4-Ring**  
**(8e, 8o) CAS**  
**6-layer electrode**

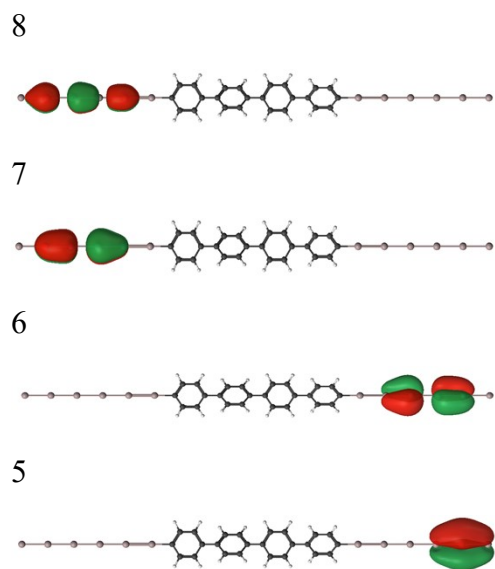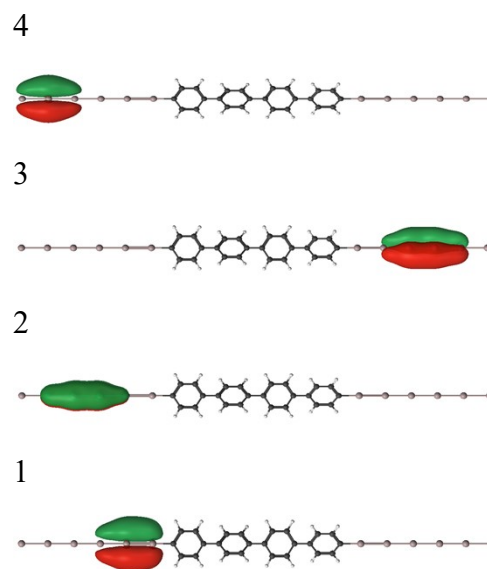

| Orb. | Occ. |
|------|------|
| 8    | 0.02 |
| 7    | 0.31 |
| 6    | 0.35 |
| 5    | 1.0  |
| 4    | 1.0  |
| 3    | 1.65 |
| 2    | 1.67 |
| 1    | 2.0  |

**pP 5-Ring**  
**(12e, 12o) CAS**

12

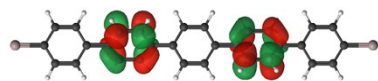

11

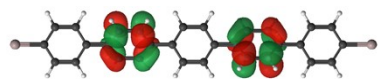

10

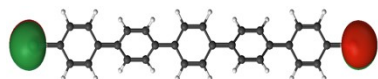

9

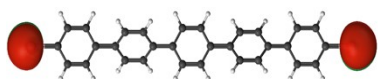

8

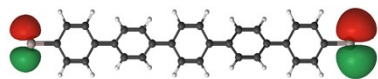

7

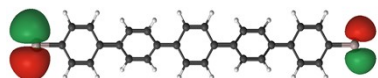

6

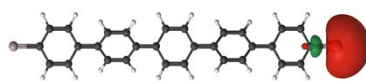

5

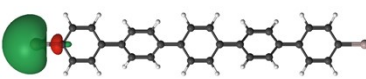

4

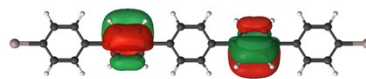

3

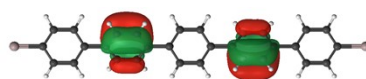

2

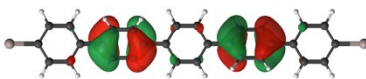

1

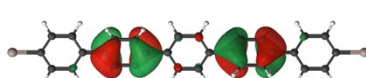

| Orb. | Occ. |
|------|------|
| 12   | 0.05 |
| 11   | 0.05 |
| 10   | 0.06 |
| 9    | 0.06 |
| 8    | 0.07 |
| 7    | 0.07 |
| 6    | 1.87 |
| 5    | 1.87 |
| 4    | 1.96 |
| 3    | 1.96 |
| 2    | 1.99 |
| 1    | 2.0  |

## pP 5-Ring

(8e, 8o) CAS

1-layer electrode

8

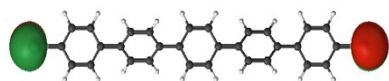

7

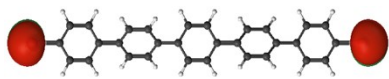

6

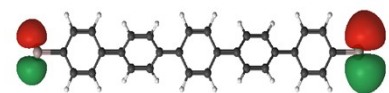

5

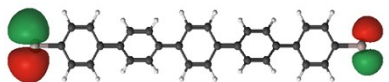

4

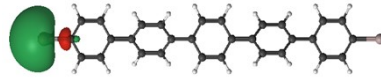

3

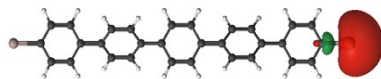

2

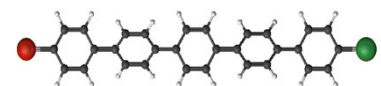

1

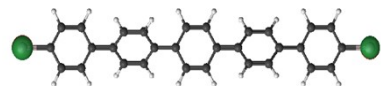

| Orb. | Occ. |
|------|------|
| 8    | 0.06 |
| 7    | 0.06 |
| 6    | 0.07 |
| 5    | 0.07 |
| 4    | 1.87 |
| 3    | 1.87 |
| 2    | 2.0  |
| 1    | 2.0  |

## **pP 5-Ring**

**(8e, 8o) CAS**

**2-layer electrode**



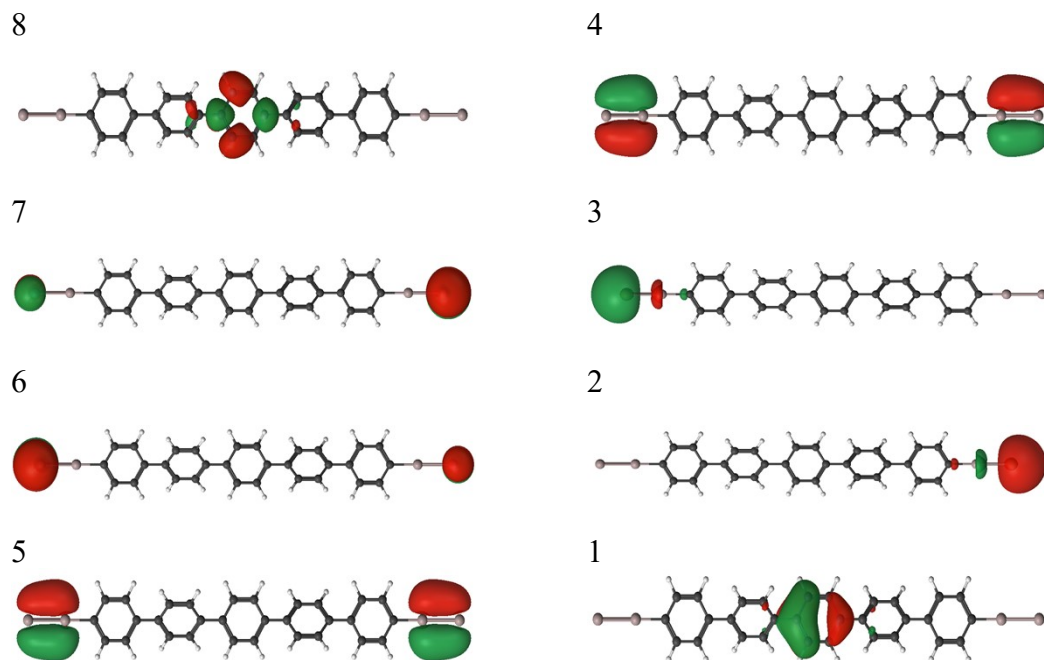

| Orb. | Occ. |
|------|------|
| 8    | 0.04 |
| 7    | 0.08 |
| 6    | 0.08 |
| 5    | 1.0  |
| 4    | 1.0  |
| 3    | 1.92 |
| 2    | 1.92 |
| 1    | 1.96 |

## **pP 5-Ring**

**(8e, 8o) CAS**

**4-layer electrode**

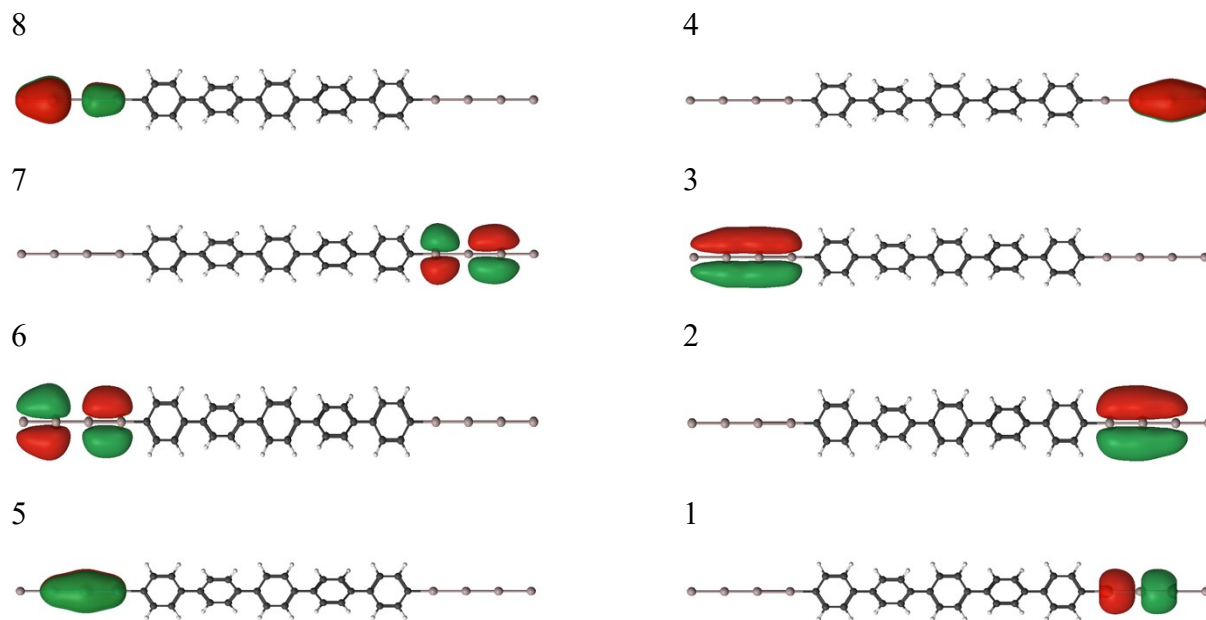

| Orb. | Occ. |
|------|------|
| 8    | 0.04 |
| 7    | 0.23 |
| 6    | 0.36 |
| 5    | 0.96 |
| 4    | 1.00 |
| 3    | 1.64 |
| 2    | 1.77 |
| 1    | 2.0  |

**pP 5-Ring**  
**(8e, 8o) CAS**  
**6-layer electrode**

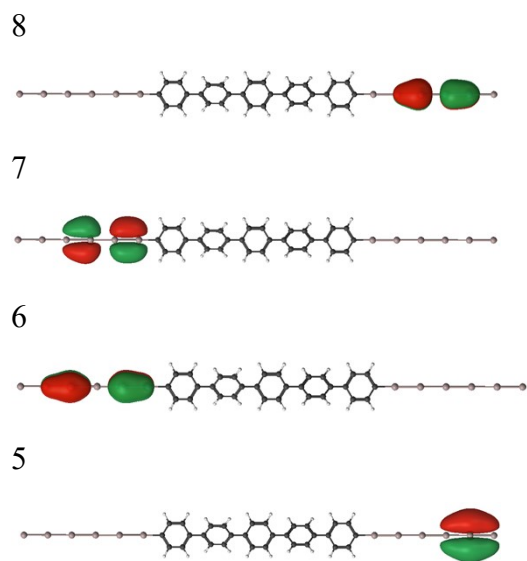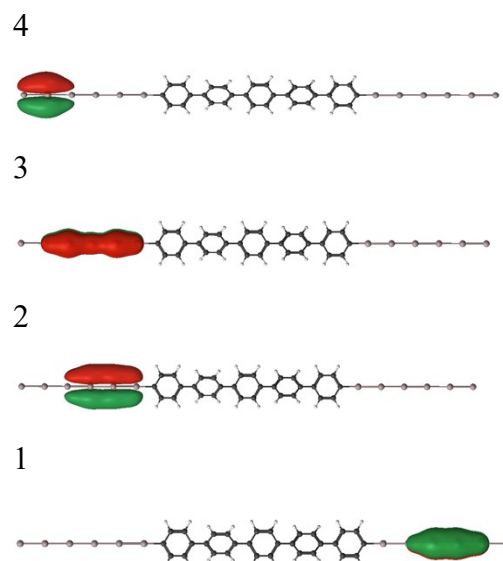

| Orb. | Occ. |
|------|------|
| 8    | 0.35 |
| 7    | 0.47 |
| 6    | 0.75 |
| 5    | 1.0  |
| 4    | 1.0  |
| 3    | 1.25 |
| 2    | 1.53 |
| 1    | 1.65 |

**pX2 1-Ring**  
**(12e, 12o) CAS**

12

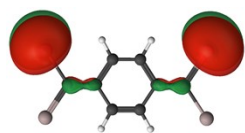

11

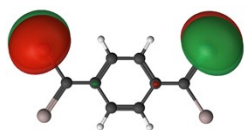

10

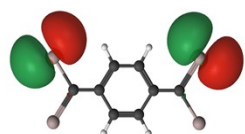

9

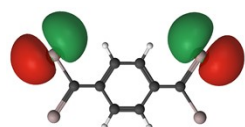

8

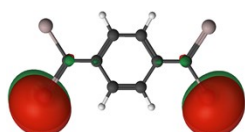

7

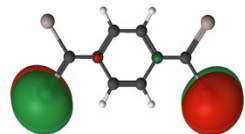

6

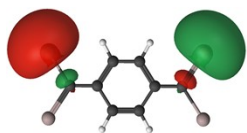

5

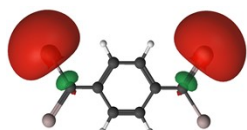

4

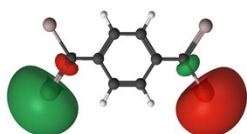

3

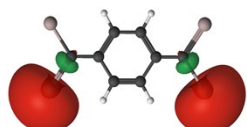

2

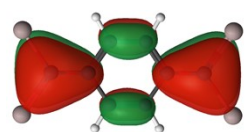

1

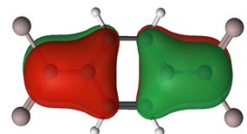

| Orb. | Occ. |
|------|------|
| 12   | 0.06 |
| 11   | 0.06 |
| 10   | 0.07 |
| 9    | 0.07 |
| 8    | 0.08 |
| 7    | 0.08 |
| 6    | 1.87 |
| 5    | 1.87 |
| 4    | 1.92 |
| 3    | 1.92 |
| 2    | 2.0  |
| 1    | 2.0  |

## pX2 1-Ring

(8e, 8o) CAS

1-layer electrode

8

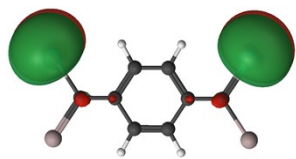

7

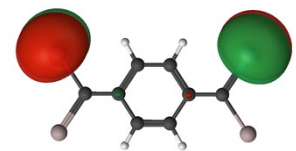

6

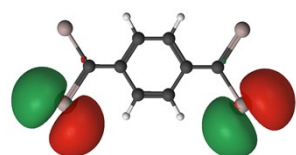

5

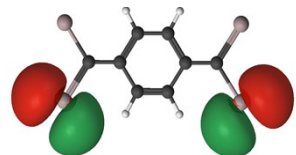

4

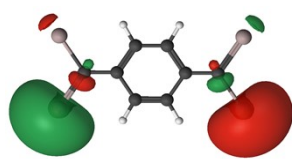

3

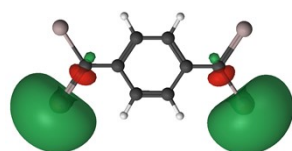

2

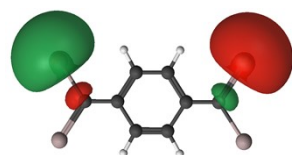

1

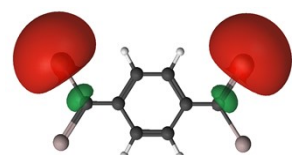

| Orb. | Occ. |
|------|------|
| 8    | 0.08 |
| 7    | 0.08 |
| 6    | 0.09 |
| 5    | 0.09 |
| 4    | 1.91 |
| 3    | 1.91 |
| 2    | 1.92 |
| 1    | 1.92 |

**pX2 1-Ring**  
**(8e, 8o) CAS**

## 2-layer electrode

8

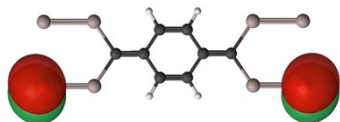

7

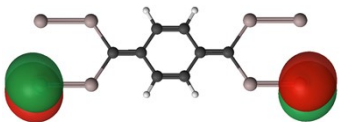

6

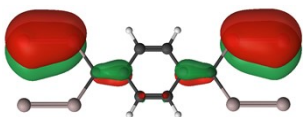

5

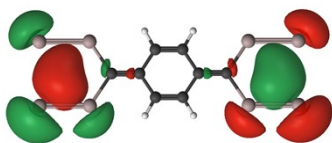

4

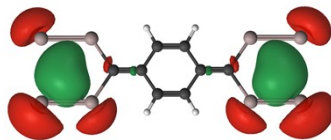

3

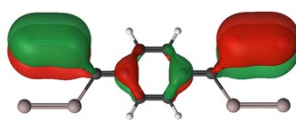

2

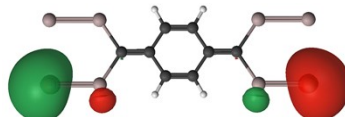

1

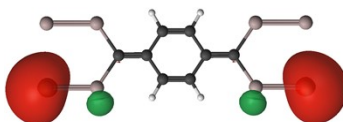

| Orb. | Occ. |
|------|------|
| 8    | 0.08 |
| 7    | 0.08 |
| 6    | 0.74 |
| 5    | 0.98 |
| 4    | 1.01 |
| 3    | 1.26 |
| 2    | 1.93 |
| 1    | 1.93 |

## pX2 1-Ring

(8e, 8o) CAS

4-layer electrode

8 4

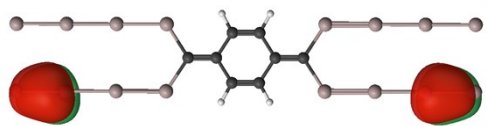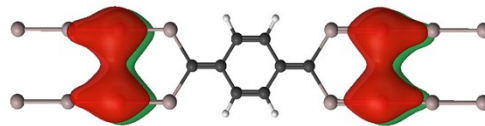

7 3

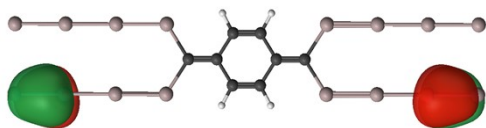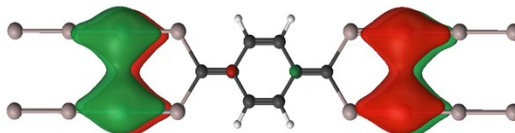

6 2

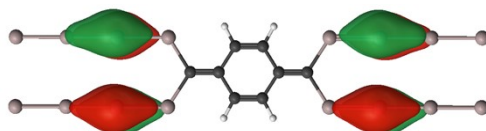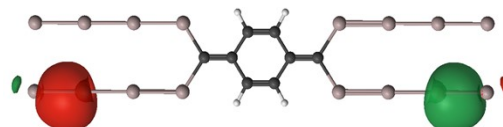

5 1

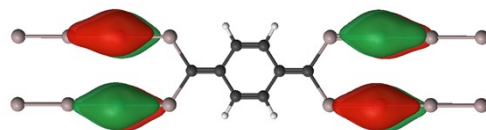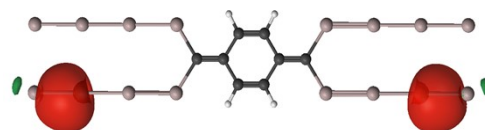

| Orb. | Occ. |
|------|------|
| 8    | 0.04 |
| 7    | 0.04 |
| 6    | 0.31 |
| 5    | 0.31 |
| 4    | 1.68 |
| 3    | 1.7  |
| 2    | 1.96 |
| 1    | 1.96 |

## **pX2 1-Ring**

**(8e, 8o) CAS**

**6-layer electrode**

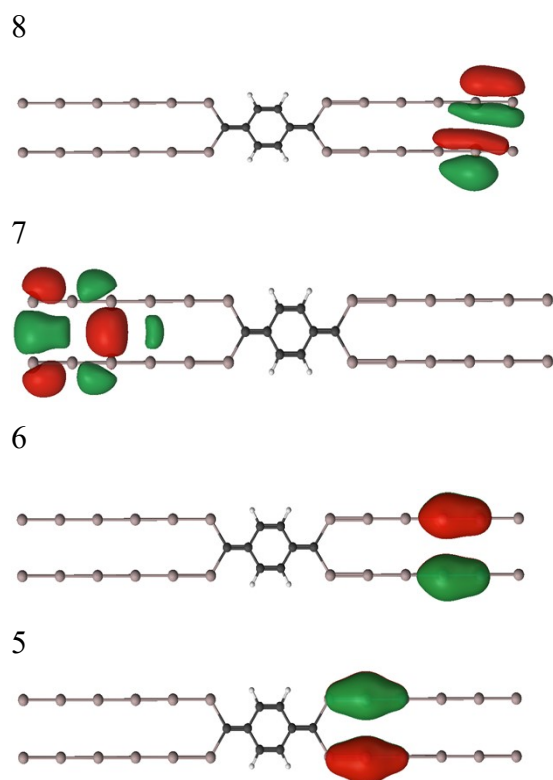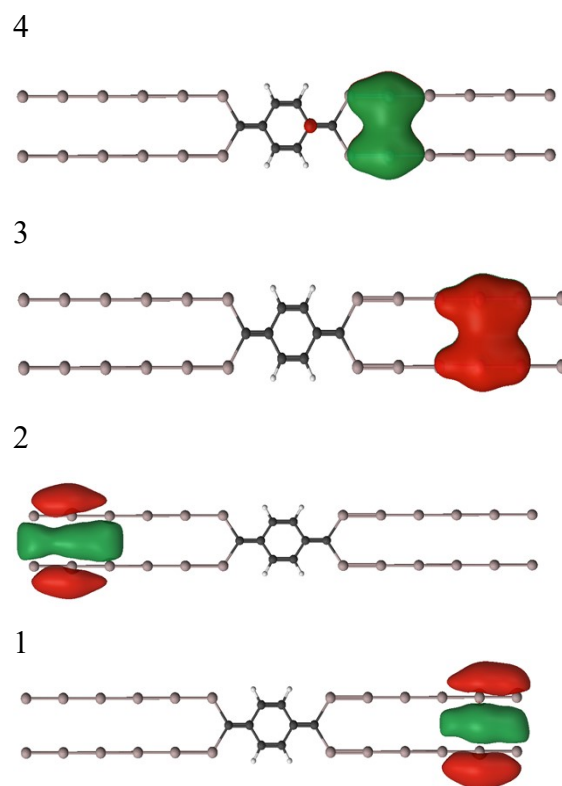

| Orb. | Occ. |
|------|------|
| 8    | 0.07 |
| 7    | 0.12 |
| 6    | 0.23 |
| 5    | 0.36 |
| 4    | 1.64 |
| 3    | 1.76 |
| 2    | 1.88 |
| 1    | 1.93 |

**pX2 2-Ring**  
**(12e, 12o) CAS**



12

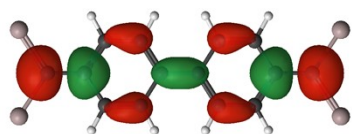

11

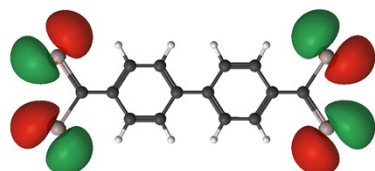

10

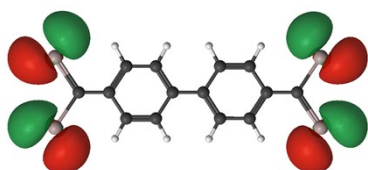

9

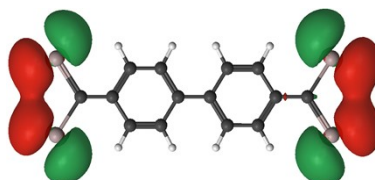

8

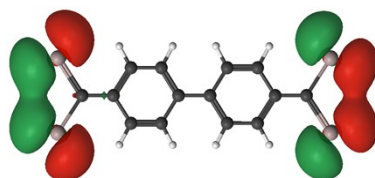

7

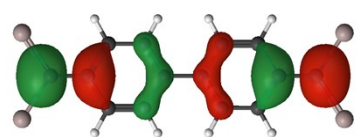

6

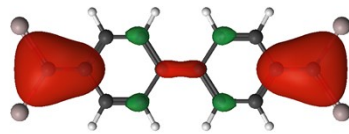

5

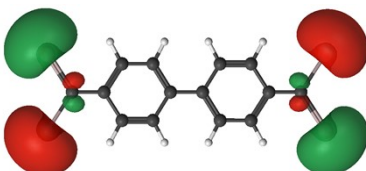

4

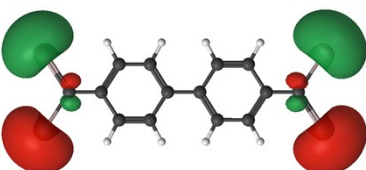

3

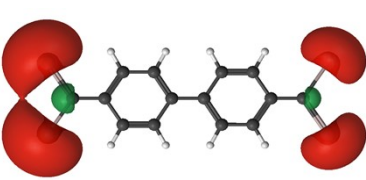

2

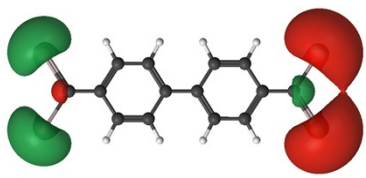

1

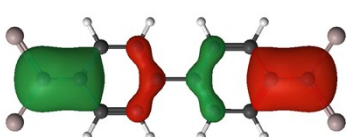

| Orb. | Occ. |
|------|------|
| 12   | 0.07 |
| 11   | 0.08 |
| 10   | 0.08 |
| 9    | 0.1  |
| 8    | 0.1  |
| 7    | 0.1  |
| 6    | 1.9  |
| 5    | 1.91 |
| 4    | 1.91 |
| 3    | 1.91 |
| 2    | 1.91 |
| 1    | 1.92 |

## pX2 2-Ring

(8e, 8o) CAS

## 1-layer electrode

8

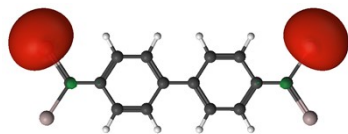

7

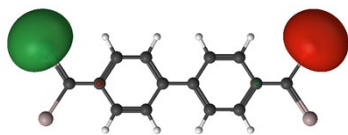

6

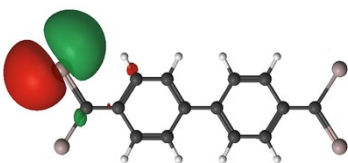

5

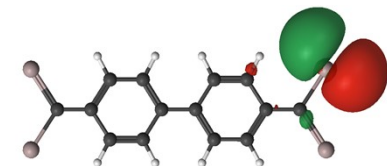

4

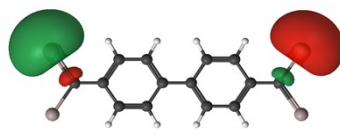

3

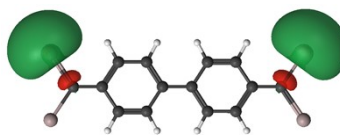

2

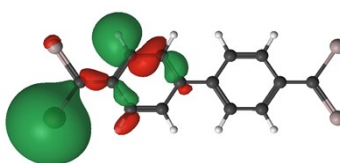

1

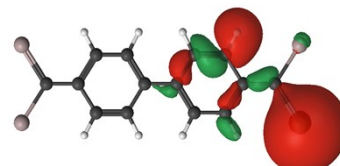

| Orb. | Occ. |
|------|------|
| 8    | 0.06 |
| 7    | 0.06 |
| 6    | 0.07 |
| 5    | 0.07 |
| 4    | 1.87 |
| 3    | 1.87 |
| 2    | 2.0  |
| 1    | 2.0  |

## pX2 2-Ring

(8e, 8o) CAS

## 2-layer electrode

8

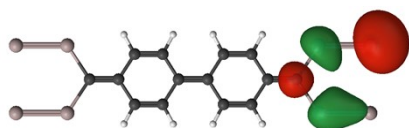

4

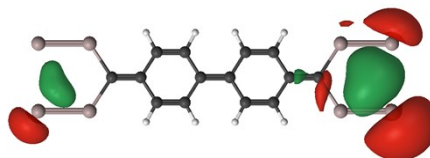

7

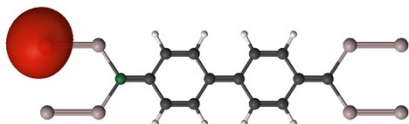

3

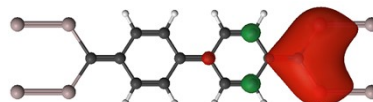

6

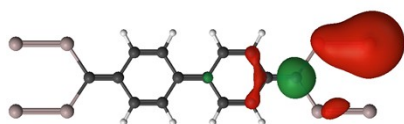

2

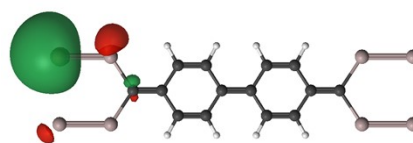

5

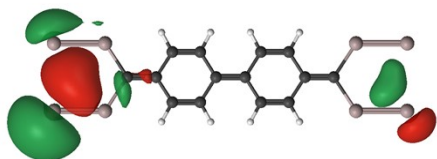

1

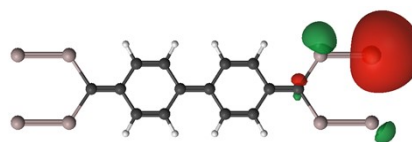

| Orb. | Occ. |
|------|------|
| 8    | 0.06 |
| 7    | 0.09 |
| 6    | 0.11 |
| 5    | 1.0  |
| 4    | 1.0  |
| 3    | 1.91 |
| 2    | 1.92 |
| 1    | 1.92 |

## pX2 2-Ring

(8e, 8o) CAS

4-layer electrode

8

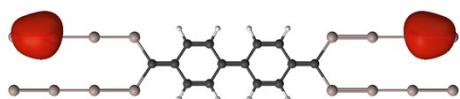

7

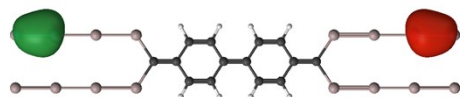

6

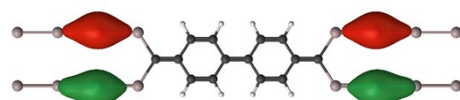

5

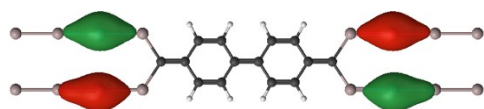

4

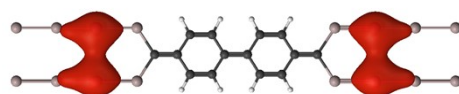

3

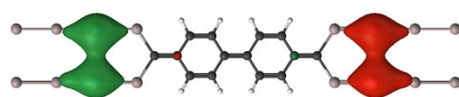

2

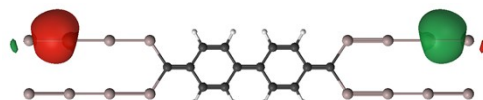

1

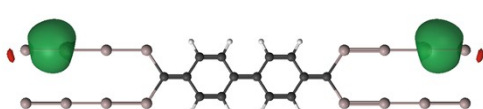

| Orb. | Occ. |
|------|------|
| 8    | 0.04 |
| 7    | 0.04 |
| 6    | 0.30 |
| 5    | 0.30 |
| 4    | 1.69 |
| 3    | 1.71 |
| 2    | 1.96 |
| 1    | 1.96 |

## **pX2 2-Ring**

**(8e, 8o) CAS**

**6-layer electrode**

8

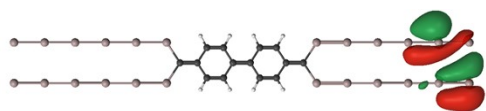

7

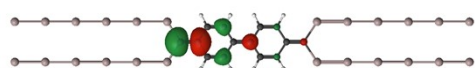

6

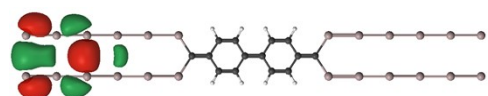

5

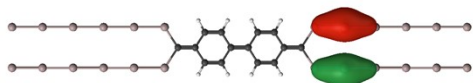

4

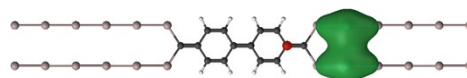

3

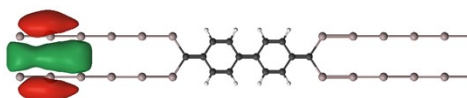

2

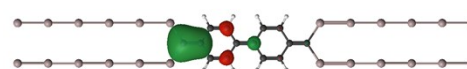

1

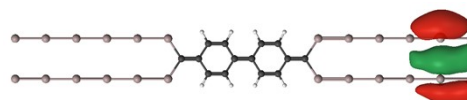

| Orb. | Occ. |
|------|------|
| 8    | 0.08 |
| 7    | 0.08 |
| 6    | 0.12 |
| 5    | 0.35 |
| 4    | 1.65 |
| 3    | 1.88 |
| 2    | 1.92 |
| 1    | 1.92 |

## pX2 3-Ring

## (12e, 12o) CAS

12

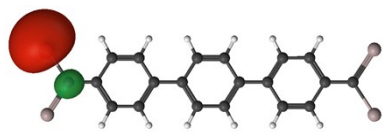

11

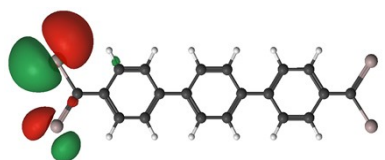

10

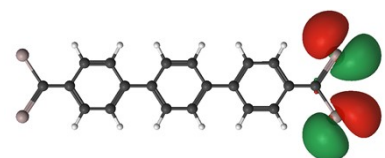

9

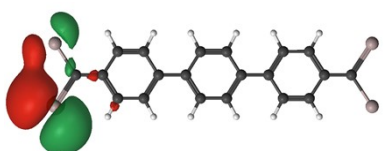

8

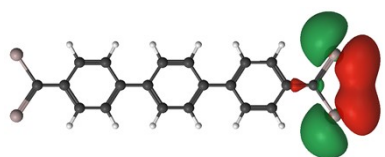

7

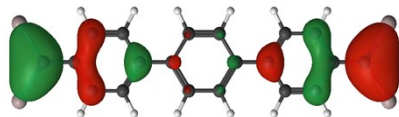

6

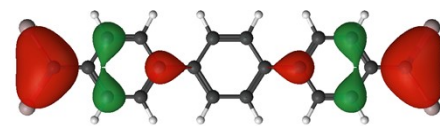

5

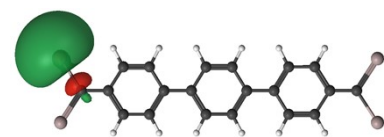

4

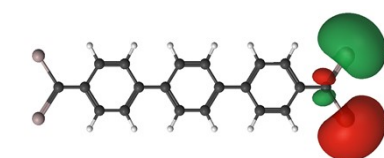

3

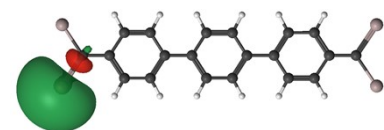

2

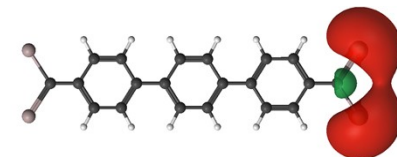

1

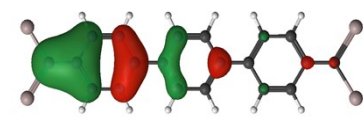

| Orb. | Occ. |
|------|------|
| 12   | 0.06 |
| 11   | 0.07 |
| 10   | 0.08 |
| 9    | 0.09 |
| 8    | 0.1  |
| 7    | 0.8  |
| 6    | 1.21 |
| 5    | 1.87 |
| 4    | 1.91 |
| 3    | 1.91 |
| 2    | 1.91 |
| 1    | 2.0  |

## pX2 3-Ring

(8e, 8o) CAS

1-layer electrode

8

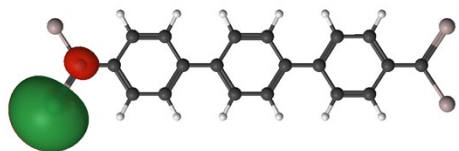

7

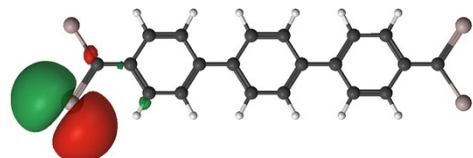

6

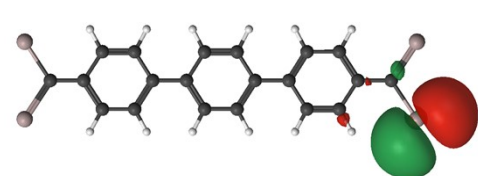

5

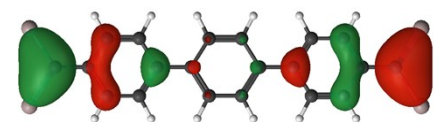

4

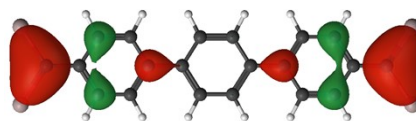

3

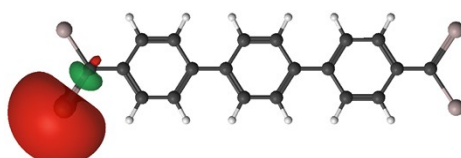

2

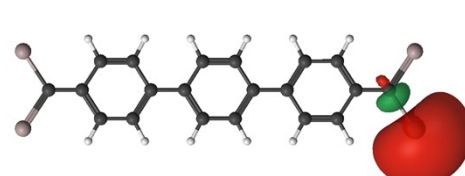

1

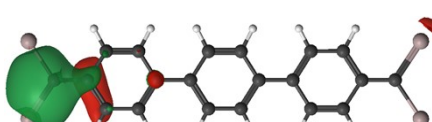

| Orb. | Occ. |
|------|------|
| 8    | 0.06 |
| 7    | 0.07 |
| 6    | 0.09 |
| 5    | 0.8  |
| 4    | 1.2  |
| 3    | 1.87 |
| 2    | 1.91 |
| 1    | 2.0  |

## pX2 3-Ring

**(8e, 8o) CAS**

**2-layer**

**electrode**

8

4

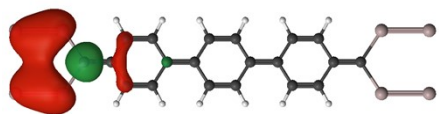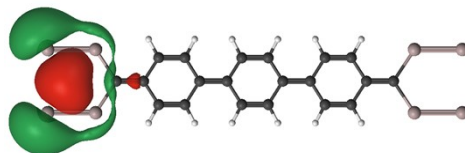

7

3

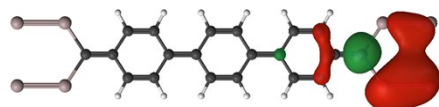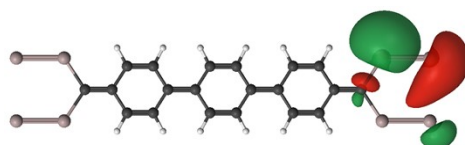

6

2

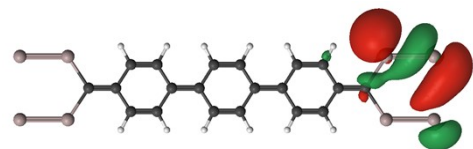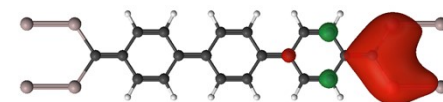

5

1

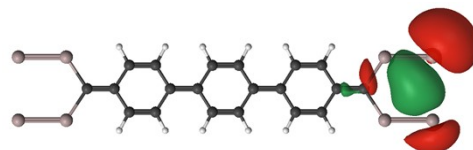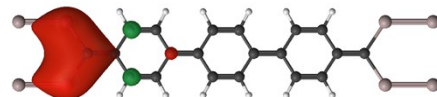

| Orb. | Occ. |
|------|------|
| 8    | 0.1  |
| 7    | 0.11 |
| 6    | 0.13 |
| 5    | 1.0  |
| 4    | 1.0  |
| 3    | 1.87 |
| 2    | 1.89 |
| 1    | 1.90 |

**pX2 3-Ring**



**(8e, 8o) CAS**  
**4-layer electrode**

8

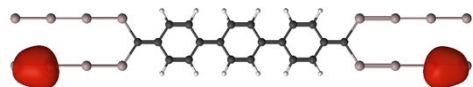

7

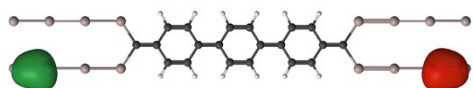

6

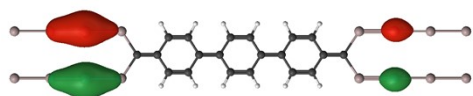

5

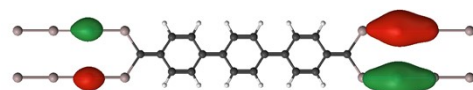

4

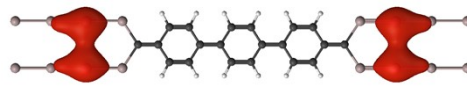

3

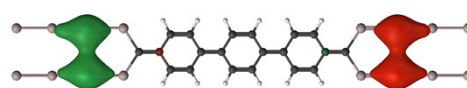

2

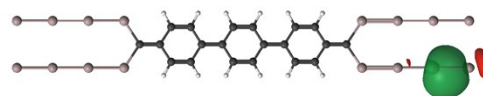

1

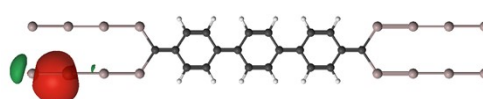

| Orb. | Occ. |
|------|------|
| 8    | 0.04 |
| 7    | 0.04 |
| 6    | 0.29 |
| 5    | 0.29 |
| 4    | 1.70 |
| 3    | 1.72 |
| 2    | 1.96 |
| 1    | 1.96 |

**pX2 3-Ring**

**(8e, 8o) CAS**  
**6-layer electrode**

8

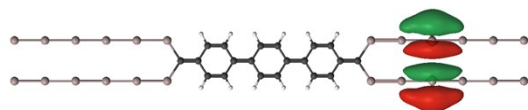

7

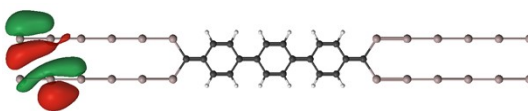

6

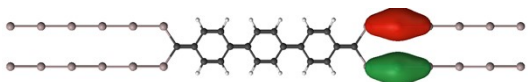

5

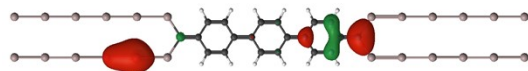

4

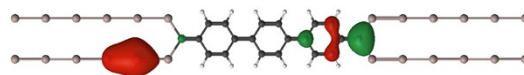

3

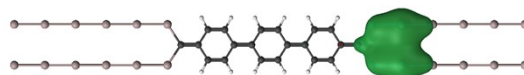

2

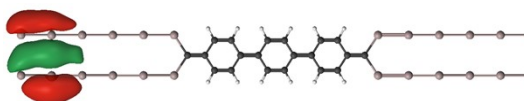

1

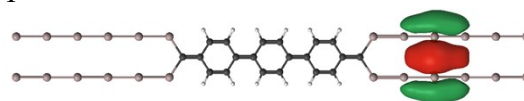

| Orb. | Occ. |
|------|------|
| 8    | 0.06 |
| 7    | 0.08 |
| 6    | 0.31 |
| 5    | 0.92 |
| 4    | 1.07 |
| 3    | 1.71 |
| 2    | 1.92 |
| 1    | 1.94 |

**pX2 4-Ring**  
**(12e, 12o) CAS**

12

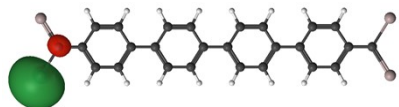

11

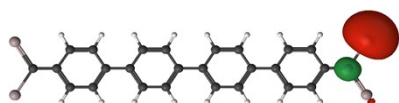

10

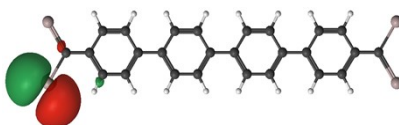

9

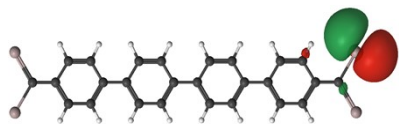

8

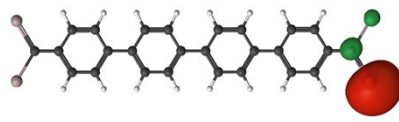

7

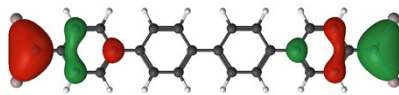

6

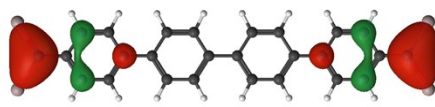

5

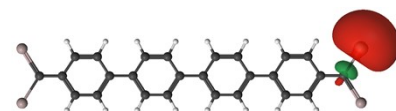

4

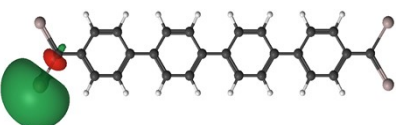

3

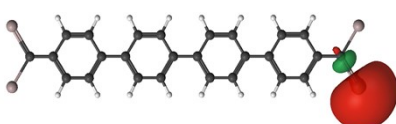

2

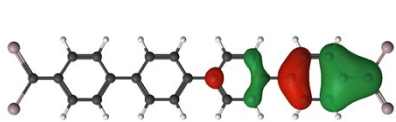

1

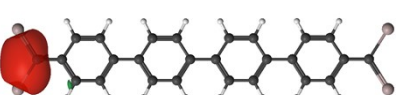

| Orb. | Occ. |
|------|------|
| 12   | 0.06 |
| 11   | 0.06 |
| 10   | 0.07 |
| 9    | 0.07 |
| 8    | 0.08 |
| 7    | 0.95 |
| 6    | 1.06 |
| 5    | 1.87 |
| 4    | 1.87 |
| 3    | 1.92 |
| 2    | 2.0  |
| 1    | 2.0  |

## pX2 4-Ring

(8e, 8o) CAS

1-layer electrode

8

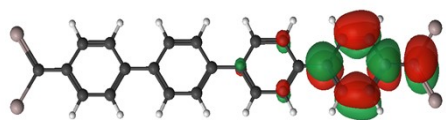

7

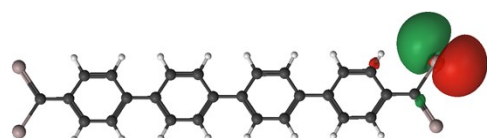

6

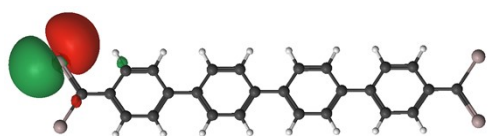

5

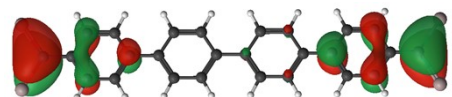

4

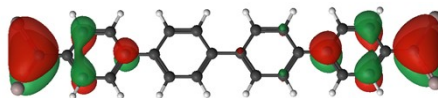

3

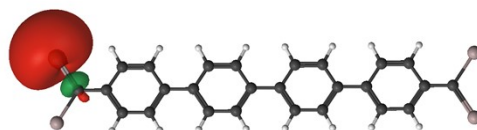

2

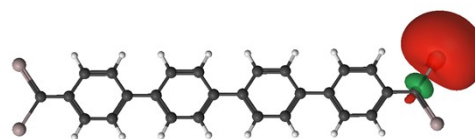

1

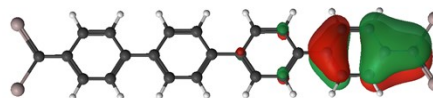

| Orb. | Occ. |
|------|------|
| 8    | 0.07 |
| 7    | 0.09 |
| 6    | 0.09 |
| 5    | 0.93 |
| 4    | 1.07 |
| 3    | 1.91 |
| 2    | 1.91 |
| 1    | 1.93 |

## pX2 4-Ring

(8e, 8o) CAS

2-layer electrode

8

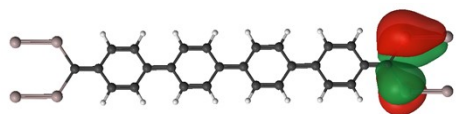

4

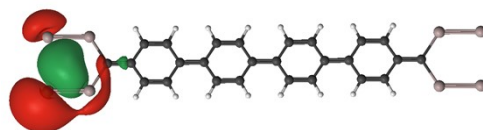

7

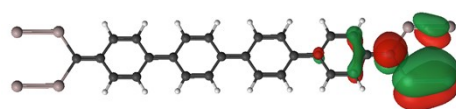

3

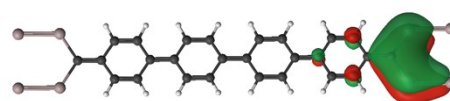

6

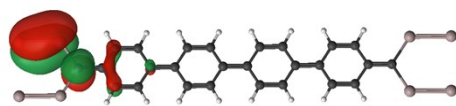

2

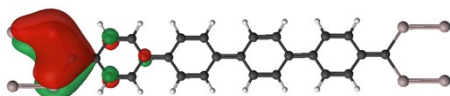

5

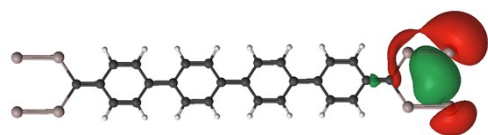

1

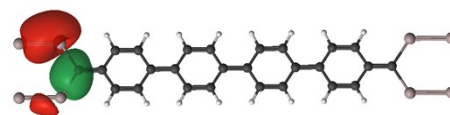

| Orb. | Occ. |
|------|------|
| 8    | 0.02 |
| 7    | 0.12 |
| 6    | 0.14 |
| 5    | 1.0  |
| 4    | 1.0  |
| 3    | 1.86 |
| 2    | 1.87 |
| 1    | 2.0  |

## pX2 4-Ring

(8e, 8o) CAS

4-layer electrode

8

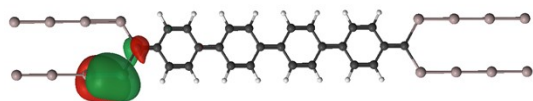

4

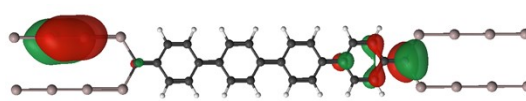

7

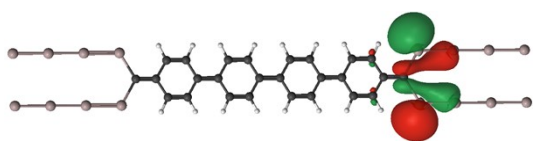

3

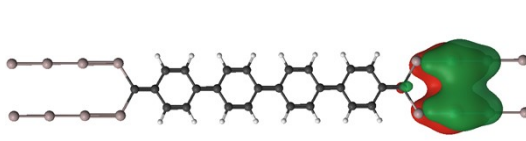

6

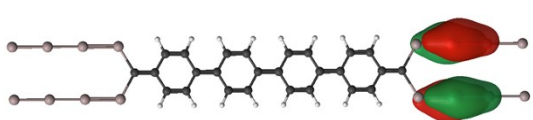

2

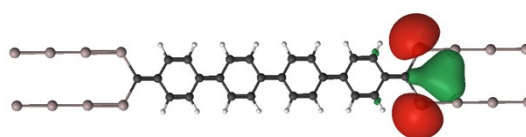

5

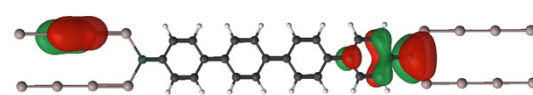

1

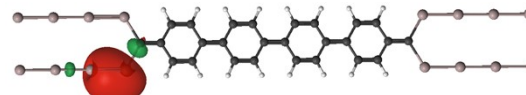

| Orb. | Occ. |
|------|------|
| 8    | 0.03 |
| 7    | 0.34 |
| 6    | 0.37 |
| 5    | 0.97 |
| 4    | 1.02 |
| 3    | 1.64 |
| 2    | 1.66 |
| 1    | 1.97 |

## pX2 4-Ring

(8e, 8o) CAS

6-layer electrode

8

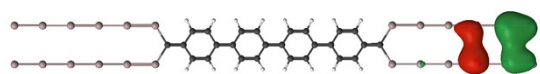

7

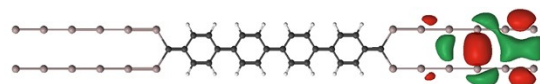

6

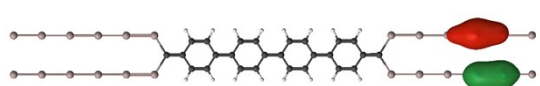

5

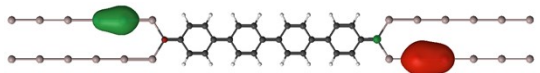

4

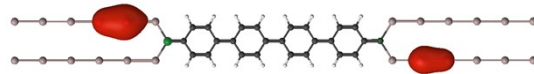

3

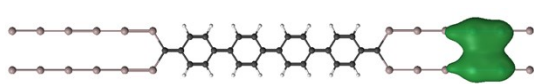

2

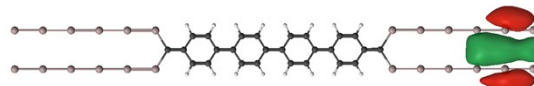

1

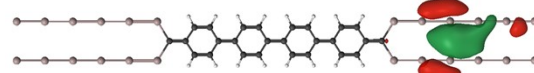

| Orb. | Occ. |
|------|------|
| 8    | 0.06 |
| 7    | 0.11 |
| 6    | 0.23 |
| 5    | 0.99 |
| 4    | 1.01 |
| 3    | 1.71 |
| 2    | 1.90 |
| 1    | 1.99 |

## pX2 5-Ring

(12e, 12o) CAS

12

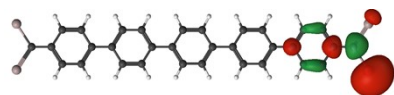

11

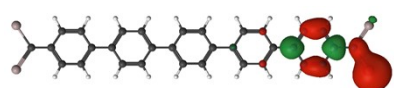

10

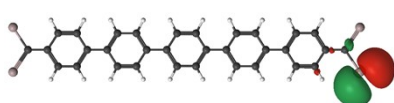

9

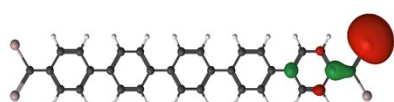

8

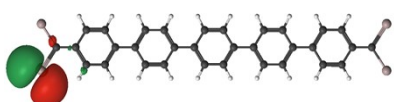

7

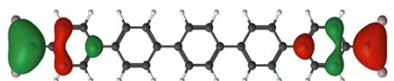

6

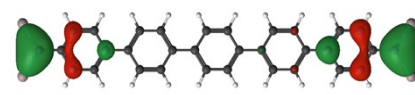

5

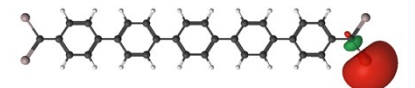

4

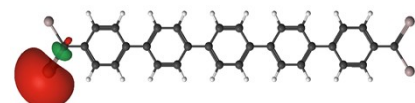

3

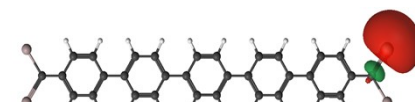

2

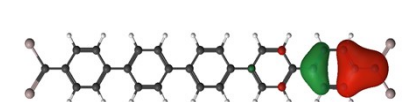

1

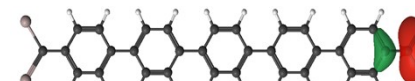

| Orb. | Occ. |
|------|------|
| 12   | 0.06 |
| 11   | 0.06 |
| 10   | 0.07 |
| 9    | 0.08 |
| 8    | 0.09 |
| 7    | 0.98 |
| 6    | 1.02 |
| 5    | 1.87 |
| 4    | 1.91 |
| 3    | 1.92 |
| 2    | 1.94 |
| 1    | 2.0  |



## pX2 5-Ring

(8e, 8o) CAS

1-layer electrode

8

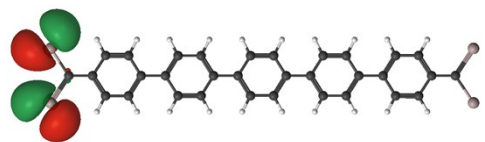

4

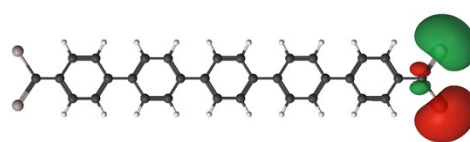

7

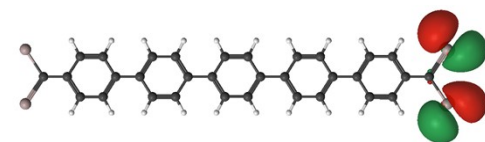

3

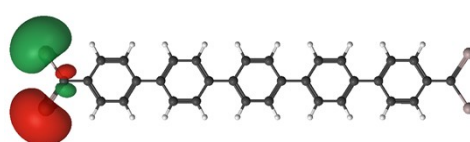

6

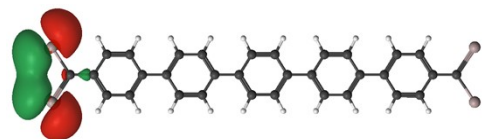

2

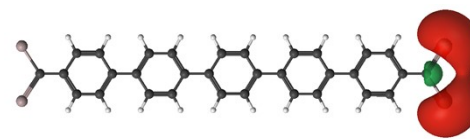

5

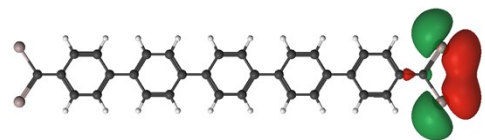

1

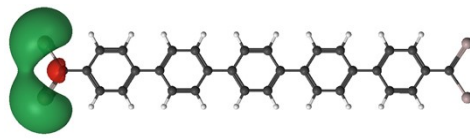

| Orb. | Occ. |
|------|------|
| 8    | 0.08 |
| 7    | 0.08 |
| 6    | 0.1  |
| 5    | 0.1  |
| 4    | 1.91 |
| 3    | 1.91 |
| 2    | 1.91 |
| 1    | 1.91 |

## pX2 5-Ring

(8e, 8o) CAS

2-layer electrode

8

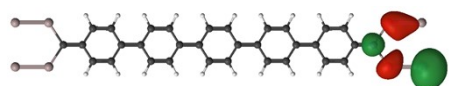

4

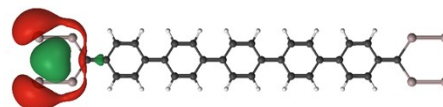

7

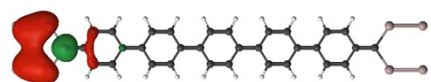

3

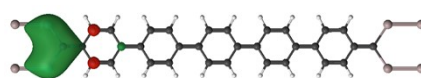

6

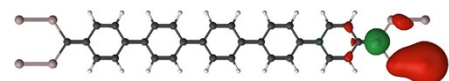

2

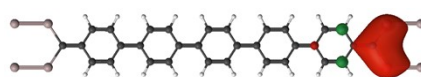

5

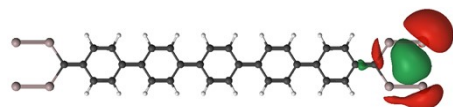

1

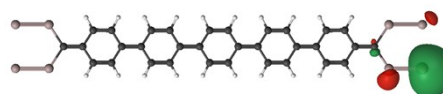

| Orb. | Occ. |
|------|------|
| 8    | 0.06 |
| 7    | 0.1  |
| 6    | 0.11 |
| 5    | 1.0  |
| 4    | 1.0  |
| 3    | 1.90 |
| 2    | 1.91 |
| 1    | 1.92 |

## pX2 5-Ring

(8e, 8o) CAS

4-layer electrode

8

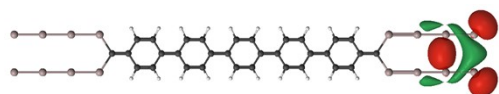

4

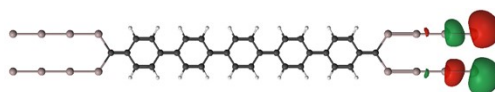

7

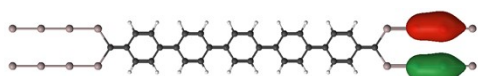

3

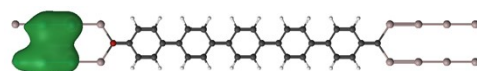

6

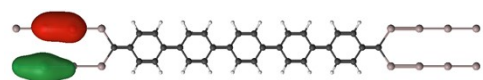

2

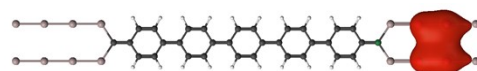

5

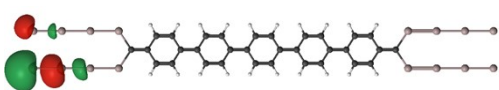

1

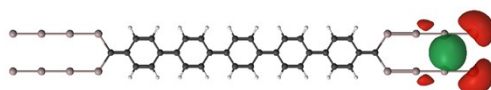

| Orb. | Occ. |
|------|------|
| 8    | 0.18 |
| 7    | 0.29 |
| 6    | 0.32 |
| 5    | 1.0  |
| 4    | 1.0  |
| 3    | 168  |
| 2    | 1.71 |
| 1    | 1.82 |

## pX2 5-Ring

(8e, 8o) CAS

6-layer electrode

8

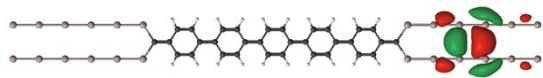

7

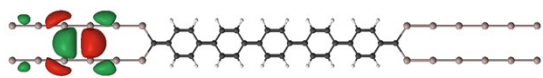

6

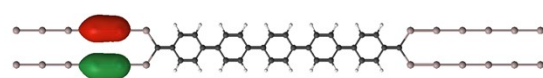

5

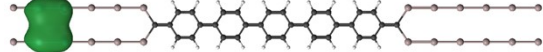

4

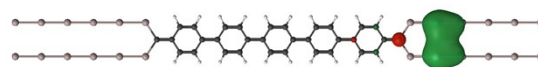

3

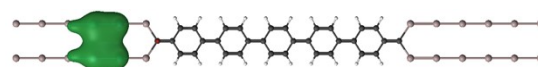

2

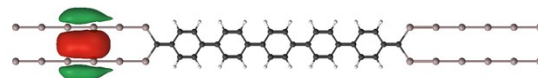

1

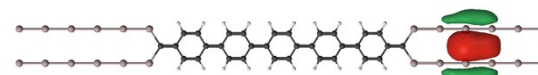

| Orb. | Occ. |
|------|------|
| 8    | 0.07 |
| 7    | 0.14 |
| 6    | 0.31 |
| 5    | 0.99 |
| 4    | 1.0  |
| 3    | 1.7  |
| 2    | 1.86 |
| 1    | 1.93 |

## pX2 1-Ring Reoptimized Active Space

(8e, 8o) CAS

6-layer electrode

8

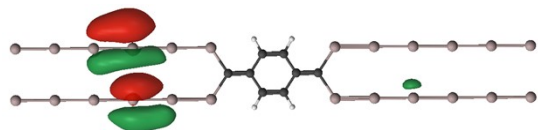

4

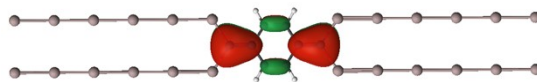

7

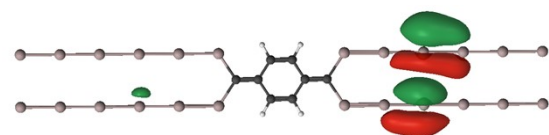

3

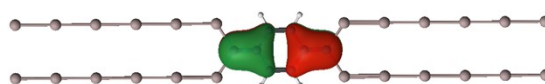

6

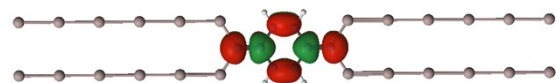

2

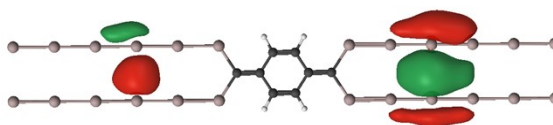

5

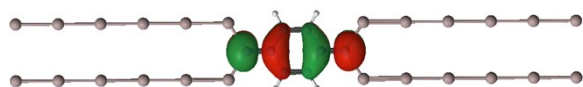

1

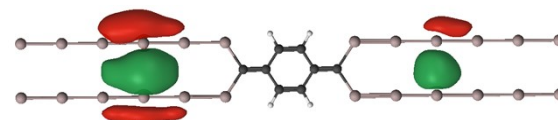

| Orb. | Occ. |
|------|------|
| 8    | 0.06 |
| 7    | 0.06 |
| 6    | 0.06 |
| 5    | 0.12 |
| 4    | 1.88 |
| 3    | 1.93 |
| 2    | 1.94 |
| 1    | 1.94 |

# pX2 2-Ring Reoptimized Active Space

(8e, 8o) CAS

6-layer electrode

8

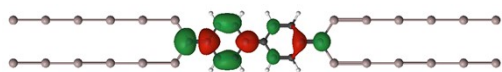

4

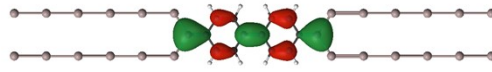

7

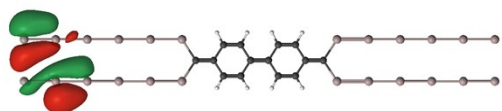

3

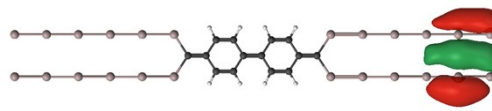

6

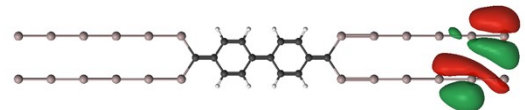

2

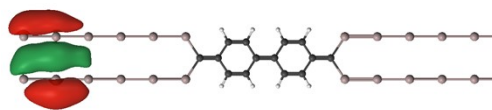

5

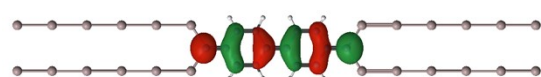

1

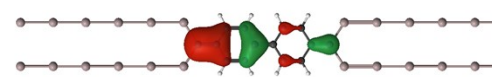

| Orb. | Occ. |
|------|------|
| 8    | 0.07 |
| 7    | 0.08 |
| 6    | 0.08 |
| 5    | 0.23 |
| 4    | 1.78 |
| 3    | 1.92 |
| 2    | 1.92 |
| 1    | 1.93 |

# pX2 3-Ring Reoptimized Active Space

(8e, 8o) CAS

6-layer electrode

8

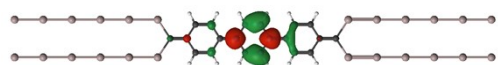

4

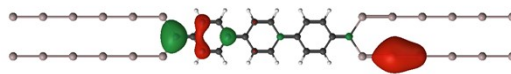

7

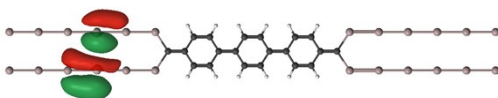

3

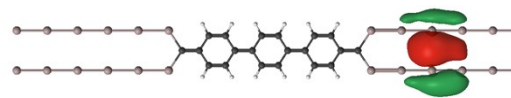

6

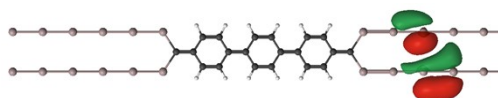

2

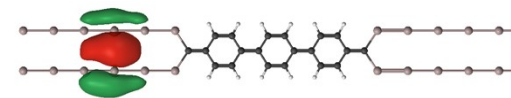

5

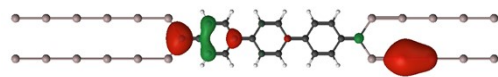

1

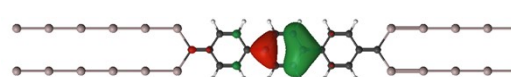

| Orb. | Occ. |
|------|------|
| 8    | 0.04 |
| 7    | 0.05 |
| 6    | 0.06 |
| 5    | 0.92 |
| 4    | 1.08 |
| 3    | 1.94 |
| 2    | 1.95 |
| 1    | 1.96 |

## pX2 4-Ring Reoptimized Active Space

(8e, 8o) CAS

6-layer electrode

8

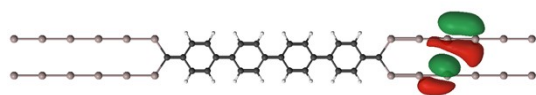

4

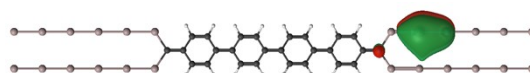

7

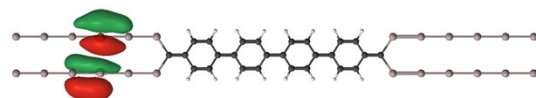

3

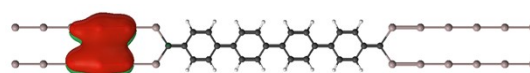

6

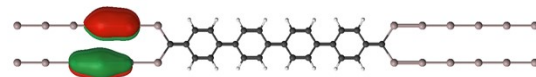

2

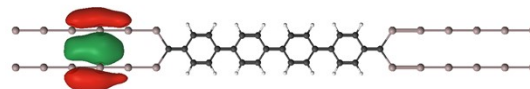

5

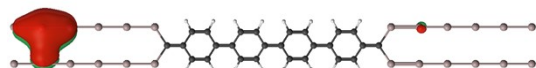

1

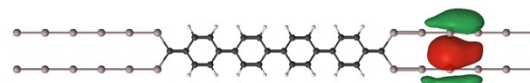

| Orb. | Occ. |
|------|------|
| 8    | 0.06 |
| 7    | 0.07 |
| 6    | 0.22 |
| 5    | 0.99 |
| 4    | 1.0  |
| 3    | 1.79 |
| 2    | 1.93 |
| 1    | 1.94 |



## pX2 5-Ring Reoptimized Active Space

(8e, 8o) CAS

6-layer electrode

8

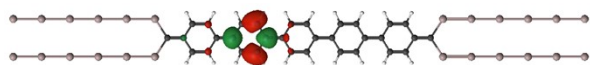

4

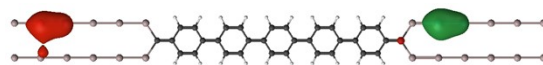

7

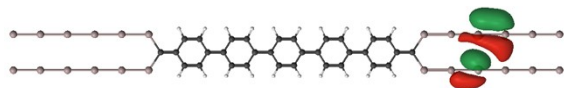

3

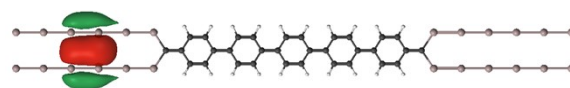

6

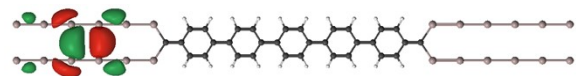

2

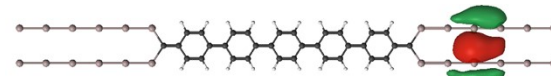

5

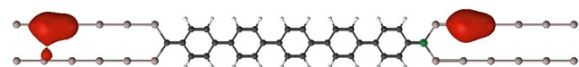

1

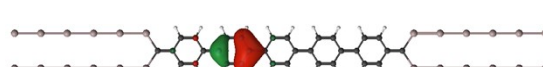

| Orb. | Occ. |
|------|------|
| 8    | 0.04 |
| 7    | 0.06 |
| 6    | 0.13 |
| 5    | 1.0  |
| 4    | 1.0  |
| 3    | 1.87 |
| 2    | 1.94 |
| 1    | 1.96 |

## pX2 5-Ring Twisted Active Space

(8e, 8o) CAS

1-layer electrode

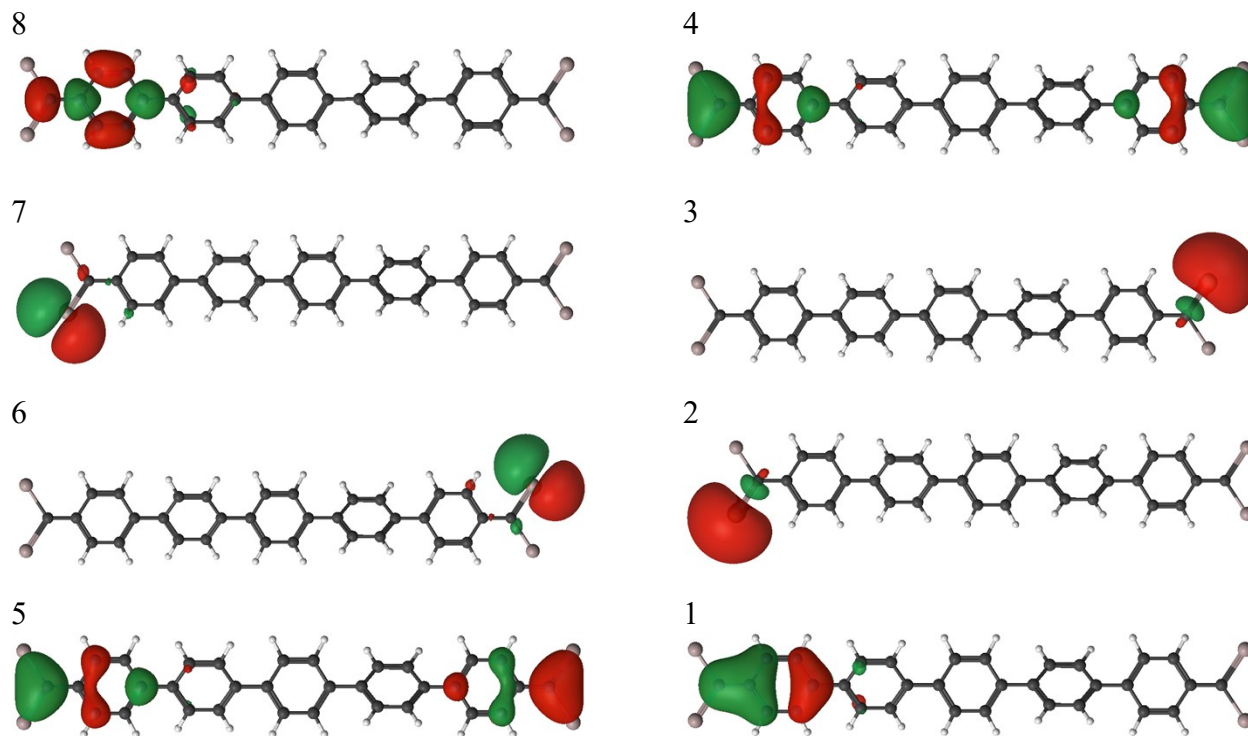

| Orb. | Occ. |
|------|------|
| 8    | 0.06 |
| 7    | 0.09 |
| 6    | 0.09 |
| 5    | 0.99 |
| 4    | 1.01 |
| 3    | 1.91 |
| 2    | 1.91 |
| 1    | 1.94 |

## pX2 5-Ring Twisted Active Space

(8e, 8o) CAS

2-layer electrode

8

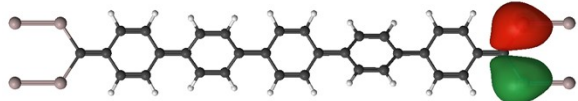

4

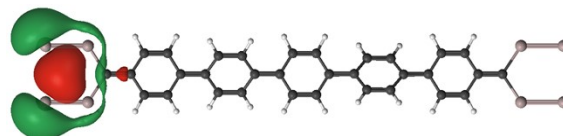

7

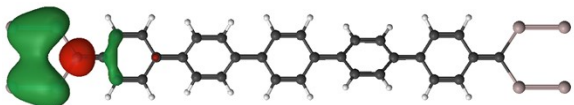

3

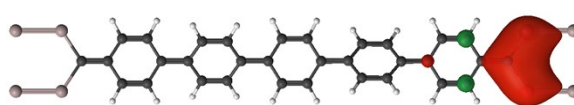

6

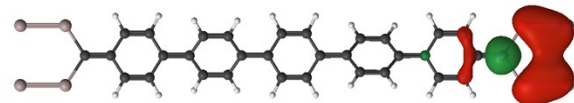

2

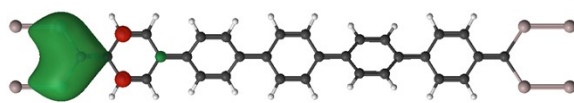

5

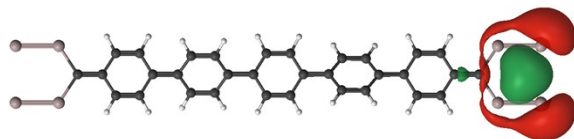

1

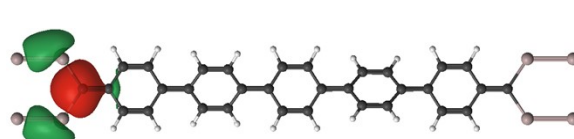

| Orb. | Occ. |
|------|------|
| 8    | 0.02 |
| 7    | 0.10 |
| 6    | 0.10 |
| 5    | 1.00 |
| 4    | 1.00 |
| 3    | 1.89 |
| 2    | 1.91 |
| 1    | 2.00 |

## pX2 5-Ring Twisted Active Space

(8e, 8o) CAS

4-layer electrode

8

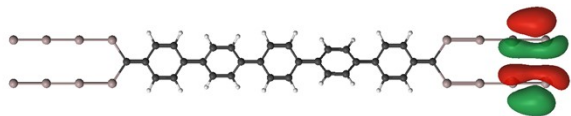

4

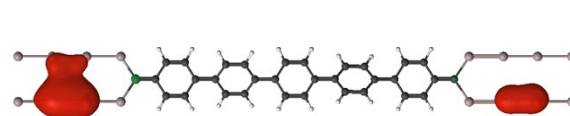

7

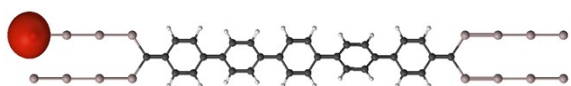

3

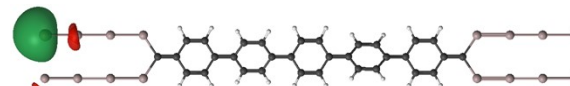

6

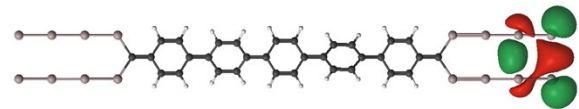

2

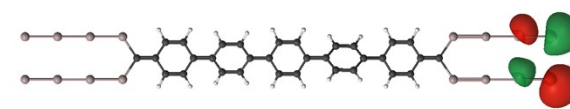

5

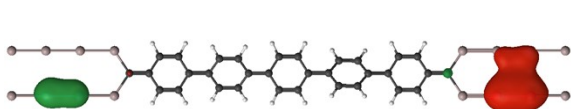

1

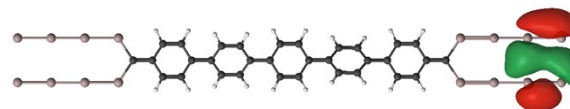

| Orb. | Occ. |
|------|------|
| 8    | 0.04 |
| 7    | 0.08 |
| 6    | 0.09 |
| 5    | 1.00 |
| 4    | 1.00 |
| 3    | 1.92 |
| 2    | 1.93 |
| 1    | 1.94 |

## pX2 5-Ring Twisted Active Space

(8e, 8o) CAS

6-layer electrode

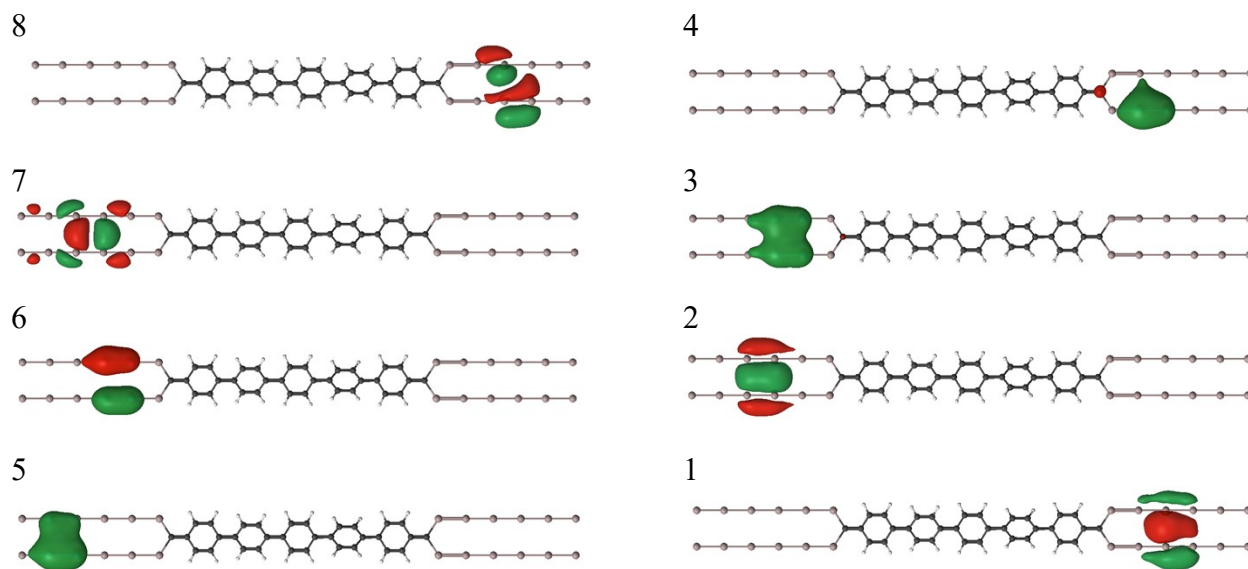

| Orb. | Occ. |
|------|------|
| 8    | 0.06 |
| 7    | 0.14 |
| 6    | 0.31 |
| 5    | 0.99 |
| 4    | 1.00 |
| 3    | 1.70 |
| 2    | 1.86 |
| 1    | 1.94 |
